# Supplementary material for: Combined Cellular and Biochemical Profiling to Identify Predictive Drug Response Biomarkers for Kinase Inhibitors Approved for Clinical Use between 2013 and 2017
Source: Oxford University Press journal article supplement (doi:10.1158/1535-7163.mct-18-0877), 2018-10-31
Supplement: 15357163mct180877-sup-206465_2_supp_5070869_pfzh5q.xlsx [file 15357163mct180877-sup-206465_2_supp_5070869_pfzh5q.xlsx]

## Sheet: TableS4a
Uitdehaag et al. (2018) Supplementary Table S4. Validation of predictive response biomarkers based on gene expression profiles, for the 17 analyzed inhibitors
	Genes of which expression correlates with drug response. See Figure S2 for a detailed validation workflow.
	Legend
	The in-house workflow column presents the pearson correlation, corresponding p-value and Sigma score which are defined by the in-house workflow defined in Figure S2
	The CCLE RNA seq, COSMIC, and Genentech column show the correlations and corresponding p-values of the genes when correlations are calculated using RNA sequencing data from CCLE (Barretina et al, 2016), microarray data from COSMIC (Iorio et al, 2017), and RNA sequencing data from Genentech (Klijn et al, 2014), respectively
	The PharmacoDB column shows the Standardized Coefficient of the gene-drug combination as reported in the PharmacoDB database of pharmacogenomic data (Smirnov et al, 2017)
	Green rows represent genes which are retained after the in-house validation, have a pearson correlation ≥ 0.25 or ≤ -0.25 for at least 2 different gene expression databases, and (if available) are correlated in the independent pharmacogenomic data of the PharmacoDB (see Supplementary Figure S2 for a detailed workflow)
	Blue rows represent genes which meet the requirements of the green rows, but also meet the validation requirements in the profile of at least 1 mechanistically comparable compound
	PharmacoDB data indicated in red represent genes which meet the requirements for in-house validation, and have a pearson correlation ≥ 0.25 or ≤ -0.25 for at least 2 different gene expression databases, but have a Standardized Coefficient score in the PharmacoDB > -0.1 or < 0.1, or the score is not statistically significant.
	When the PharmacoDB column only contains 'NA', this means the inhibitor has not been profiled in a large cell line panel study before, and is therefore not present in the PharmacoDB
	CDK
	Abemaciclib
		In-house workflow			CCLE RNA seq		COSMIC		Genentech		PharmacoDB
	Gene	pearson	p-val	Sigma	pearson	p-val	pearson	p-val	pearson	p-val	Score	p-val
	HGF	-0.28503	0.005362	-1.56206	-0.25547	0.0162935	-0.19972	0.044168	-0.37789	0.00083	NA	NA
	CDKN2A	0.3342	0.000995	2.37899	0.36571	0.0004586	0.3123	0.001396	0.30517	0.007761	NA	NA
	CDKN2B	0.25869	0.011819	1.32174	0.29748	0.0048819	0.33282	0.000631	0.2724	0.018061	NA	NA
	KLF4	0.25801	0.01205	1.2749	0.27284	0.0101155	0.25173	0.010704	0.18234	0.117415	NA	NA
	No PharmacoDB data available
	Blue shading represents genes validated in at least one other CDK inhibitor profile
	Palbociclib
		In-house workflow			CCLE RNA seq		COSMIC		Genentech		PharmacoDB
	Gene	pearson	p-val	Sigma	pearson	p-val	pearson	p-val	pearson	p-val	Score	p-val
	DIS3	-0.38205	0.000144843	-2.01963	-0.24188	0.018838	-0.4023	2.77116e-05	-0.29909	0.009142	0.00309927	0.933668
	FIP1L1	-0.33589	0.00093384	-1.30792	-0.30939	0.00241033	-0.27195	0.0056922	-0.05406	0.645082	-0.0748413	0.131074
	HGF	-0.25	0.01353	-1.4	-0.25	0.015862	-0.28	0.003859	-0.22	0.060236	0.16	0.0007
	RB1	-0.34	0.000683	-1.7	-0.29	0.005088	-0.33	0.000689	-0.27	0.017569	0.25	9.36e-11
	RAD51D	-0.47194	1.57168e-06	-2.6	-0.45	4.09e-06	-0.2	0.039926	-0.41	0.000277	-0.13*	2.40E-03*
	RPTOR	-0.35303	0.000483008	-1.75457	-0.25825	0.0119657	-0.27724	0.00478712	-0.29314	0.010699	0.0726162	0.0351765
	CDH1	0.21	0.038024	0.9	0.28	0.00719	0.22	0.025372	0.26	0.021977	-0.1	0.029152
	CDKN2A	0.3	0.002954	2.1	0.31	0.002162	0.29	0.003343	0.29	0.010262	-0.29	2.17e-17
	CDKN2B	0.24	0.01882	1.2	0.32	0.001653	0.29	0.002683	0.34	0.002565	-0.16	9.07e-06
	CCNE1	0.22	0.031322	1.2	0.22	0.030567	0.29	0.003647	0.35	0.001787	-0.24	1.09e-11
	ERBB2	0.22518	0.0291049	1.03582	0.2801	0.00625157	0.14439	0.147654	0.25665	0.026239	-0.0465429	0.232831
	HIST1H2BD	0.32651	0.00131921	1.73811	0.34929	0.000559446	0.18329	0.065185	0.35145	0.00199	-0.0382962	0.277057
	TP53	0.21739	0.0353189	1.23855	0.25788	0.0120931	0.131	0.189381	0.30969	0.006856	0.077834	0.0249535
	*Gene not present in PharmacoDB datasets. The presented 'Score' is the pearson correlation between GDSC drug response data and CCLE microarray gene expression data.
	Blue shading represents genes validated in at least one other CDK inhibitor profile
	Ribociclib
		In-house workflow			CCLE RNA seq		COSMIC		Genentech		PharmacoDB
	Gene	pearson	p-val	Sigma	pearson	p-val	pearson	p-val	pearson	p-val	Score	p-val
	RAD51D	-0.33922	0.000824015	-1.6	-0.28	0.006721	-0.08	0.419409	-0.31	0.006492	NA	NA
	KDM5A	-0.24465	0.0174778	-0.5	-0.18	0.076963	-0.28	0.004413	-0.28	0.013992	NA	NA
	CDKN2A	0.23884	0.0204316	1.6	0.24	0.017569	0.28	0.004378	0.29	0.012235	NA	NA
	No PharmacoDB data available
	Blue shading represents genes validated in at least one other CDK inhibitor profile
	ALK
	Alectinib
		In-house workflow			CCLE RNA seq		COSMIC		Genentech		PharmacoDB
	Gene	pearson	p-val	Sigma	pearson	p-val	pearson	p-val	pearson	p-val	Score	p-val
	ALK	-0.49577	3.75848e-07	-2.1	-0.48	8.48e-07	-0.12	0.237793	-0.49	7.33e-06	0.61	1.05e-85
	CD274	-0.29901	0.00341673	-1.8	-0.31	0.002608	-0.27	0.005999	-0.33	0.003506	0.17	2.9e-07
	DICER1	-0.25038	0.0149368	-1.3	-0.33	0.001057	-0.32	0.001219	-0.37	0.001241	0.1	0.00474372
	ETV6	-0.34229	0.000733	-1.7035	-0.34922	0.000561	-0.22397	0.023638	-0.35784	0.001621	0.0636855	0.079477
	IFNGR1	-0.31858	0.0017519	-1.7	-0.34	0.00089	-0.32	0.000963	-0.23	0.047115	0.17	1.51e-06
	IL10	-0.47721	1.15607e-06	-2.2	-0.46	2.35e-06	-0.13	0.181454	-0.59	2.18e-08	0.18	2.37e-07
	JAK3	-0.59459	2.64038e-10	-2.3	-0.53	4.55e-08	-0.13	0.200202	-0.64	5.15e-10	0.13	0.000600953
	KAT6A	-0.31671	0.001871	-1.14523	-0.37271	0.000216	NA	NA	-0.37701	0.000856	0.0420224	0.243458
	NFKBIA	-0.31155	0.002238	-2.0532	-0.34409	0.000684	-0.29135	0.00296816	-0.24073	0.037479	0.0188286	0.594239
	PIM1	-0.29522	0.003869	-1.48089	-0.27833	0.006601	-0.34913	0.000322651	-0.30629	0.007528	0.0192973	0.577689
	PRDM1	-0.39677	7.52251e-05	-1.8	-0.42	2.26e-05	-0.29	0.003054	-0.35	0.002403	0.12	0.000869493
	SOCS1	-0.34443	0.000675427	-1.1	-0.38	0.00015	-0.42	8.81e-06	-0.49	6.68e-06	0.17	2.58e-06
	STAT4	-0.25852	0.011877	-0.87067	-0.39917	6.74e-05	-0.30661	0.001723	-0.35997	0.001513	0.0778669	0.0229407
	FGFR4	0.22581	0.028645	1.95283	0.29401	0.004025	0.20251	0.04123	0.26094	0.023751	-0.011971	0.74685
	INSR	-0.00739	0.94368	1.51022	0.3092	0.002427	0.26367	0.007414	0.28069	0.014716	-0.0796329	0.0258539
	STAG2	0.44724	6.21e-06	2.91718	0.4	7.96e-05	0.26237	0.007722	0.45	5.59e-05	-0.090314	0.00696199
	Blue shading represents genes validated in at least one other ALK inhibitor profile
	Brigatinib
		In-house workflow			CCLE RNA seq		COSMIC		Genentech		PharmacoDB
	Gene	pearson	p-val	Sigma	pearson	p-val	pearson	p-val	pearson	p-val	Score	p-val
	ALK	-0.536	2.58734e-08	-2.4	-0.42	2.13e-05	-0.28	0.005042	-0.53	1.24e-06	NA	NA
	DICER1	-0.44447	7.19668e-06	-2.7	-0.4	6.88e-05	-0.39	6.37e-05	-0.51	3.25e-06	NA	NA
	ETV6	-0.34217	0.000736584	-1.7	-0.36	0.000357	-0.09	0.356044	-0.4	0.000379	NA	NA
	IL10	-0.43796	1.0126e-05	-2	-0.48	1.21e-06	-0.18	0.066743	-0.56	2.81e-07	NA	NA
	JAK3	-0.51426	1.14661e-07	-1.7	-0.48	1.23e-06	-0.28	0.005006	-0.44	7.09e-05	NA	NA
	NFKBIA	-0.30446	0.00284929	-2	-0.35	0.000467	-0.27	0.005241	-0.29	0.010357	NA	NA
	PRDM1	-0.2684	0.00890706	-1	-0.35	0.000578	-0.19	0.052177	-0.32	0.00541	NA	NA
	SOX2	-0.28596	0.00520704	-2.2	-0.28	0.007091	NA	NA	-0.44	7.88e-05	NA	NA
	DAXX	0.24275	0.0183997	2	0.26	0.011492	0.2	0.040628	0.33	0.004164	NA	NA
	PIK3CD	0.25879	0.0117828	1.5	0.28	0.006989	0.22	0.023598	0.37	0.001042	NA	NA
	STAG2	0.22072	0.0325379	1.3	0.26	0.010733	0.12	0.227275	0.34	0.002618	NA	NA
	No PharmacoDB data available
	Blue shading represents genes validated in at least one other ALK inhibitor profile
	Ceritinib
		In-house workflow			CCLE RNA seq		COSMIC		Genentech		PharmacoDB
	Gene	pearson	p-val	Sigma	pearson	p-val	pearson	p-val	pearson	p-val	Score	p-val
	ALK	-0.70793	1e-15	-3.7	-0.63	1.39e-11	-0.42	8.71e-06	-0.73	4.6e-14	NA	NA
	CDK8	-0.3723	0.000219809	-1.7	-0.41	4.36e-05	-0.34	0.000563	-0.31	0.006969	NA	NA
	DICER1	-0.41557	3.11081e-05	-2.5	-0.36	0.000328	-0.43	5.83e-06	-0.46	2.71e-05	NA	NA
	IGF1R	-0.26422	0.010073	-1.9	-0.15	0.162087	-0.26	0.007522	-0.29	0.013088	NA	NA
	IL10	-0.54238	1.63734e-08	-2.7	-0.56	3.98e-09	-0.23	0.020234	-0.65	2.12e-10	NA	NA
	JAK3	-0.56825	2.31734e-09	-2.1	-0.47	2.25e-06	-0.37	0.000144	-0.47	2.09e-05	NA	NA
	KAT6A	-0.4032	5.59472e-05	-1.7	-0.3	0.003281	NA	NA	-0.28	0.01592	NA	NA
	KDM5A	-0.41351	3.43503e-05	-1.6	-0.26	0.013031	-0.19	0.058338	-0.26	0.022359	NA	NA
	PHOX2B	-0.30098	0.00320159	-2.3	-0.27	0.007451	-0.23	0.019491	-0.28	0.014395	NA	NA
	PTCH1	-0.3213	0.00159066	-1.8	-0.24	0.02237	-0.29	0.003275	-0.35	0.002015	NA	NA
	EGFR	0.24936	0.0153621	0.6	0.29	0.004806	0.21	0.037825	0.29	0.01257	NA	NA
	SMAD3	0.20551	0.0469113	1.3	0.3	0.002939	0.19	0.058267	0.28	0.014138	NA	NA
	No PharmacoDB data available
	Blue shading represents genes validated in at least one other ALK inhibitor profile
	BTK
	Ibrutinib
		In-house workflow			CCLE RNA seq		COSMIC		Genentech		PharmacoDB
	Gene	pearson	p-val	Sigma	pearson	p-val	pearson	p-val	pearson	p-val	Score	p-val
	AKT2	-0.24904	0.016076	-2.0073	-0.25839	0.0123948	-0.21244	0.032938	-0.3233	0.00496	0.016801	0.680708
	CDK12	-0.25	0.014271	-1.3	-0.38	0.000151	-0.34	0.000581	-0.2	0.0937	0.22	1.79e-07
	ERBB2	-0.35	0.000493	-2.1	-0.28	0.006452	-0.27	0.006893	-0.14	0.249362	0.29	7.01e-11
	ERBB4	-0.35	0.000517	-2.8	-0.32	0.001506	-0.33	0.000777	-0.39	0.000562	0.11	0.00717584
	FANCD2	-0.30671	0.00278809	-1.99234	-0.26101	0.0115039	-0.28822	0.003469	-0.14904	0.205027	0.00819881	0.859305
	FGFR2	-0.30057	0.0034183	-1.84363	-0.32582	0.00143721	-0.25538	0.009954	-0.22711	0.051667	-0.000820435	0.984051
	FGFR3	-0.26821	0.00933909	-1.31722	-0.33289	0.00111254	-0.27217	0.005897	-0.23007	0.0486082	0.0254918	0.530663
	ICOSLG	-0.25201	0.0148129	-2.101	-0.34047	0.000839962	-0.14838	0.138643	-0.33947	0.003087	0.0771223	0.0772236
	NFKBIA	-0.44	1.23e-05	-2.7	-0.44	1.2e-05	-0.31	0.001338	-0.25	0.033633	0.1	0.020823
	REL	-0.33	0.001465	-1.4	-0.36	0.000471	-0.38	8.19e-05	-0.32	0.006014	0.18	2.3e-05
	TP63	-0.27	0.009046	-1.2	-0.31	0.002748	-0.31	0.001854	-0.24	0.038968	0.1	0.0466353
	VTCN1	-0.30501	0.00295073	-1.75112	-0.37	0.0003	-0.26732	0.006882	NA	NA	0.0663865	0.12905
	DDR2	0.34	0.000972	2.2	0.32	0.001483	0.24	0.017826	0.32	0.006091	-0.14	0.0110957
	ERCC1	0.28646	0.00537288	2.34292	0.45	7.53e-06	0.28378	0.00403	0.37	0.001	-0.0343855	0.412094
	ETV1	0.38	0.000183	2.4	0.37	0.000213	0.39	5.21e-05	0.38	0.000915	-0.1	0.0266772
	ETV5	0.4	6e-05	2.3	0.38	0.000166	0.36	0.000242	0.32	0.004841	-0.1	0.019933
	PDGFRB	0.24855	0.0162924	1.35691	0.28418	0.00576939	0.22937	0.02104	0.26	0.02	-0.0505582	0.284996
	Acalabrutinib
	The drug response data of acalabrutinib is highly influenced by one cell line, SU-DHL-6. Therefore, no further predictive biomarker analyses were performed for this compound as these analyses would be heavily based on SU-DHL-6.
	HER2/EGFR
	Osimertinib
		In-house workflow			CCLE RNA seq		COSMIC		Genentech		PharmacoDB
	Gene	pearson	p-val	Sigma	pearson	p-val	pearson	p-val	pearson	p-val	Score	p-val
	CDH1	-0.28918	0.0047	-2.37723	-0.27939	0.00639	-0.22132	0.025386	-0.20887	0.07212	NA	NA
	CDK12	-0.26688	0.00931585	-1.4	-0.32	0.001811	-0.3	0.002181	-0.2	0.078577	NA	NA
	ERBB2	-0.3942	8.45352e-05	-2.4	-0.35	0.000503	-0.39	5.57e-05	-0.26	0.026361	NA	NA
	FGFR2	-0.2887	0.00477251	-1.8	-0.28	0.005739	-0.29	0.002812	-0.17	0.137698	NA	NA
	FGFR3	-0.38943	0.000104687	-2.1	-0.41	4.84e-05	-0.33621	0.000551	-0.39	0.000535	NA	NA
	KDM6A	-0.23311	0.0237557	-0.4	-0.26	0.011371	-0.25	0.010368	-0.24	0.040626	NA	NA
	NFKBIA	-0.32549	0.00136876	-2.1	-0.34	0.000951	-0.28	0.004003	-0.27	0.020148	NA	NA
	RPS6KA4	-0.2604	0.0112522	-1.6	-0.28	0.006954	-0.25	0.011297	-0.21	0.074746	NA	NA
	TP63	-0.38907	0.000106357	-2	-0.45	6.19e-06	-0.38	8.67e-05	-0.4	0.000425	NA	NA
	VTCN1	-0.26382	0.0101906	-1.5	-0.29	0.004334	-0.25	0.011414	NA	NA	NA	NA
	ETV1	0.26535	0.00974459	1.6	0.25	0.013555	0.33	0.000698	0.25	0.030318	NA	NA
	No PharmacoDB data available
	Blue shading represents genes that are also validated from erlotinib or gefitinib profiling
	Neratinib
		In-house workflow			CCLE RNA seq		COSMIC		Genentech		PharmacoDB
	Gene	pearson	p-val	Sigma	pearson	p-val	pearson	p-val	pearson	p-val	Score	p-val
	CDH1	-0.3133	0.002107	-2.53545	-0.28667	0.005092	-0.23319	0.018338	-0.27859	0.015509	0.0926507	0.0277152
	EGFR	-0.31474	0.00200386	-2.2	-0.34	0.000858	-0.25	0.011767	-0.30715	0.007352	0.14	0.000263017
	ERBB2	-0.44356	7.5497e-06	-2.6	-0.43	1.37e-05	-0.44	3.26e-06	-0.37518	0.000911	0.38	2.27e-26
	FGFR2	-0.27475	0.007362	-1.6788	-0.29202	0.004291	-0.26885	0.00629	-0.23693	0.04069	-0.05838	0.0915494
	FGFR3	-0.30642	0.002667	-1.57161	-0.36481	0.0003	-0.33047	0.000693	-0.40511	0.000312	0.022988	0.506324
	FOXA1	-0.3144	0.00202811	-2.5	-0.29447	0.003964	-0.33073	0.000686	-0.30011	0.008897	0.14	0.00092118
	NFKBIA	-0.32895	0.001207	-2.14511	-0.32419	0.001434	-0.32948	0.000721	-0.36228	0.001403	0.0514672	0.153166
	RAC1	-0.30008	0.003298	-2.63086	-0.29926	0.003389	-0.30849	0.001608	-0.13079	0.263364	0.0330123	0.418216
	RPS6KA4	-0.28133	0.006019	-1.74904	-0.2688	0.008802	-0.17813	0.073265	-0.26089	0.023775	0.0230055	0.55391
	TP63	-0.30953	0.002399	-1.44617	-0.35668	0.000418	-0.38	7.26e-05	-0.34318	0.002577	0.0722459	0.0733153
	YAP1	-0.26885	0.008788	-1.82254	-0.25869	0.011817	-0.38	9.79e-05	-0.24026	0.037871	-0.0341359	0.359769
	CCND3	0.27193	0.008016	2.55015	0.26222	0.010674	0.21622	0.02906	0.30147	0.008579	-0.0443378	0.220556
	Blue shading represents genes that are also validated from lapatinib profiling
	Cobimetinib hits validated with trametinib PharmacoDB data
		In-house workflow			CCLE RNA seq		COSMIC		Genentech		PharmacoDB
	Gene	pearson	p-val	Sigma	pearson	p-val	pearson	p-val	pearson	p-val	Score	p-val
	CTNNB1	-0.2341	0.0231515	-2	-0.38	0.000194	-0.24309	0.013821	-0.25	0.029065	NA	NA
	EREG	-0.36253	0.00033	-2.68063	-0.31363	0.002083	-0.366	0.000155	-0.28787	0.012267	NA	NA
	ETV4	-0.38452	0.000130058	-2.6	-0.47	2.25e-06	-0.33	0.00072	-0.53	9.25e-07	NA	NA
	ETV5	-0.41577	3.08074e-05	-2.32274	-0.46	3.04e-06	-0.28	0.003806	-0.43	9.78e-05	NA	NA
	IRS2	-0.41242	3.62049e-05	-3.4	-0.35	0.000541	-0.32	0.001072	-0.49	8.39e-06	NA	NA
	KLF4	-0.32551	0.00136786	-2.4	-0.32	0.001893	-0.31	0.001508	-0.25	0.028008	NA	NA
	MET	-0.29106	0.004427	-2.17627	-0.26843	0.008901	-0.29054	0.003053	-0.13094	0.262825	NA	NA
	NFE2L2	-0.30102	0.003197	-2.07625	-0.29899	0.003419	-0.26523	0.007057	-0.19375	0.095801	NA	NA
	PAK1	-0.24142	0.019071	-1.85846	-0.27016	0.008452	-0.29384	0.002722	-0.18986	0.102788	NA	NA
	RPS6KA4	-0.32258	0.00152	-2.02109	-0.40929	4.2e-05	-0.2722	0.005646	-0.41724	0.000196	NA	NA
	AKT2	0.38457	0.00012974	3	0.39	9.09e-05	0.41	1.46e-05	0.28	0.015233	NA	NA
	ARID1A	0.29765	0.00357311	2.4	0.21683	0.0358	0.39	5.33e-05	0.30606	0.007576	NA	NA
	ARID5B	0.29612	0.003757	2.44036	0.19544	0.059053	0.33376	0.000608	0.36307	0.001367	NA	NA
	BARD1	0.34217	0.000736524	2.5	0.32	0.001544	0.39	4.87e-05	0.48	1.32e-05	NA	NA
	BCL6	0.37965	0.000160735	2.3	0.42	2.38e-05	0.28	0.004024	0.39	0.000542	NA	NA
	BRIP1	0.25494	0.0131472	2.3	0.22172	0.031736	0.27	0.005225	0.35	0.002247	NA	NA
	CCND3	0.32385	0.001452	2.89963	0.3335	0.001021	0.29121	0.002984	0.12103	0.300973	NA	NA
	CD79A	0.39957	6.6179e-05	3.5	0.4	7.48e-05	0.17803	0.07342	0.38	0.000686	NA	NA
	CD79B	0.39049	9.98489e-05	3.6	0.36	0.000315	0.26	0.008325	0.36	0.001527	NA	NA
	GNA13	0.31921	0.00171296	3.1	0.3	0.00306	0.26	0.007704	0.41	0.000294	NA	NA
	TP53	0.36974	0.000245	2.3041	0.38296	0.000139	0.29202	0.0029	0.28432	0.013428	NA	NA
	No PharmacoDB data available
	Blue shading represents genes that are also validated from trametinib profiling
	Idelalisib
		In-house workflow			CCLE RNA seq		COSMIC		Genentech		PharmacoDB
	Gene	pearson	p-val	Sigma	pearson	p-val	pearson	p-val	pearson	p-val	Score	p-val
	BCL6	-0.26052	0.0116659	-2.2	-0.25	0.014066	-0.3	0.002687	-0.3	0.010593	0.14	0.000155718
	CARD11	-0.31363	0.00220402	-1.7	-0.26	0.012217	-0.26	0.008811	-0.28	0.015694	0.24	1.09e-09
	CD79A	-0.29773	0.00375007	-2.1	-0.29	0.005544	-0.29	0.00342	-0.41	0.000341	0.28	3.73e-12
	CD79B	-0.30343	0.00311017	-2.7	-0.29	0.005519	-0.2	0.044118	-0.41	0.000241	0.3	3.39e-15
	PIK3CD	-0.27857	0.00685502	-1.9	-0.26	0.010722	-0.16	0.100913	-0.27	0.01791	0.28	2.91e-11
	PIK3CG	-0.26216	0.0111316	-0.44426	-0.26	0.012198	-0.16	0.113986	-0.27	0.02183	0.22	2.14e-06
	REL	-0.27703	0.00718202	-1	-0.29	0.004125	-0.32	0.00102	-0.34	0.003065	0.22	1.8e-09
	BCL2L2	0.25143	0.015053	1.19874	0.29235	0.004461	NA	NA	0.47606	1.81e-05	-0.028878	0.485999
	IGF1R	0.24469	0.0180846	1	0.26	0.011555	0.25	0.01309	0.23	0.049658	-0.11	0.000718875
	No blue shading applied because no data of PIK3CD selective inhibitors available
	Analysis based on one responsive cell line, but reported since the PharmacoDB data for idelalisib are reported for more cell lines.
	Copanlisib
		In-house workflow			CCLE RNA seq		COSMIC		Genentech		PharmacoDB
	Gene	pearson	p-val	Sigma	pearson	p-val	pearson	p-val	pearson	p-val	Score	p-val
	CEBPA	-0.22635	0.0282549	-1.6	-0.26	0.013032	NA	NA	-0.28	0.014766	NA	NA
	ERBB2	-0.26778	0.00907101	-1.6	-0.28	0.007169	-0.26	0.009118	-0.12	0.301886	NA	NA
	FGFR2	-0.20913	0.0430863	-1.3	-0.23335	0.023606	-0.31	0.001558	-0.27	0.018976	NA	NA
	ICOSLG	-0.21494	0.0374869	-1.9	-0.3	0.003018	-0.2	0.043646	-0.45	4.62e-05	NA	NA
	KIT	0.27519	0.00726681	1.8	0.27	0.00933	0.28	0.004267	0.12	0.291649	NA	NA
	No PharmacoDB data available
	No blue shading because comparison with inhibitors with similar target resulted in no overlapping validated genes.
	Midostaurin
		In-house workflow			CCLE RNA seq		COSMIC		Genentech		PharmacoDB
	Gene	pearson	p-val	Sigma	pearson	p-val	pearson	p-val	pearson	p-val	Score	p-val
	PDGFRB	-0.21651	0.036085	-1.7	-0.26101	0.0110562	-0.06	0.582355	-0.37	0.001153	0.21	3.23e-08
	AKT3	-0.23513	0.0225336	-2.10184	-0.27152	0.008117	-0.22487	0.023068	-0.25117	0.029731	-0.00421725	0.910457
	MSH2	-0.46636	2.165e-06	-2.85782	-0.3773	0.000178	-0.34656	0.00036	-0.23985	0.038203	-0.0912913	0.0106291
	MSH6	-0.27684	0.00690937	-1.87028	-0.28436	0.005475	-0.29111	0.002994	-0.15929	0.172245	-0.0586239	0.105459
	TOP2A	-0.40808	4.44953e-05	-1.36666	-0.37263	0.000217	-0.21853	0.027342	-0.31205	0.006422	-0.0231097	0.506219
	AR	0.34718	0.000607425	2.01524	0.31266	0.002154	0.22033	0.026065	0.29888	0.009194	0.04775	0.203939
	ERBB3	0.3155	0.00195199	1.49022	0.31397	0.002059	0.33972	0.000477	0.31182	0.006462	-0.0552652	0.192813
	MAX	0.21754	0.0351861	2.1853	0.27971	0.006328	0.27204	0.005676	0.3	0.008924	-0.012572	0.736983
	PIK3CB	0.32503	0.00139146	2.33316	0.2581	0.012017	0.18806	0.058377	0.26037	0.024068	0.0642161	0.0883788
	TMPRSS2	0.32788	0.00125495	1.97414	0.35731	0.000407	0.30942	0.001554	0.27073	0.018812	-0.0467075	0.264374
	No blue shading applied because no suitable inhibitor found for comparison
	VEGFR
	Lenvatinib
		In-house workflow			CCLE RNA seq		COSMIC		Genentech		PharmacoDB
	Gene	pearson	p-val	Sigma	pearson	p-val	pearson	p-val	pearson	p-val	Score	p-val
	ERG	-0.26336	0.0107523	-0.685176	-0.28528	0.005574	-0.0839	0.404191	-0.3091	0.00737	-0.000872318	0.98163
	FGFR2	-0.22716	0.0285421	-1.4	-0.33	0.001202	-0.18	0.069644	-0.35	0.00209	0.21	1.3e-09
	PIM1	-0.27805	0.00696344	-1.4	-0.3	0.003012	-0.22	0.029244	-0.33	0.004078	0.19	5.04e-07
	IRS2	0.30745	0.00271889	0.8	0.29	0.004896	0.26	0.009759	0.3	0.008349	-0.11	0.00487334
	SDHC	0.20662	0.046907	1.04734	0.29474	0.004132	0.1851	0.063868	0.43074	0.000128	-0.027967	0.434678
	Blue shading represents genes that are also validated in at least one other VEGFR inhibitor profiling
	Nintedanib
		In-house workflow			CCLE RNA seq		COSMIC		Genentech		PharmacoDB
	Gene	pearson	p-val	Sigma	pearson	p-val	pearson	p-val	pearson	p-val	Score	p-val
	ARID1B	-0.27362	0.007619	-1.19067	-0.2385	0.020616	-0.25952	0.008439	-0.26787	0.020151	0.026894	0.494585
	DNMT3B	-0.24095	0.019313	-1.27035	-0.28395	0.005545	-0.09164	0.35966	-0.30702	0.007379	-0.00982278	0.793198
	GATA1	-0.32359	0.001466	-1.39054	-0.3436	0.000698	-0.17847	0.072703	-0.49489	6.38e-06	-0.0149807	0.682194
	NTRK1	-0.31787	0.001796	-1.69237	-0.31528	0.001967	-0.23991	0.015155	-0.38906	0.000561	0.00630893	0.870658
	PIM1	-0.29009	0.00456614	-1.4	-0.32	0.001666	-0.24	0.017405	-0.49	7.5e-06	0.156112	4.04e-05
	STK40	-0.37488	0.000197	-1.737	-0.32186	0.001559	-0.36765	0.000144	-0.26905	0.01959	0.00627305	0.870693
	TET1	-0.32359	0.00146589	-1.1	-0.35	0.000498	-0.22	0.029677	-0.25	0.029344	0.152091	8.73e-05
	NFKBIA	0.28625	0.005158	0.978415	0.27	0.008	0.32	0.001	0.18617	0.109776	-0.10309	0.006544
	Blue shading represents genes that are also validated in at least one other VEGFR inhibitor profiling
	Tivozanib
		In-house workflow			CCLE RNA seq		COSMIC		Genentech		PharmacoDB
	Gene	pearson	p-val	Sigma	pearson	p-val	pearson	p-val	pearson	p-val	Score	p-val
	PIM1	-0.29387	0.00404308	-1.5	-0.31	0.002233	-0.27	0.005699	-0.47	2.39e-05	0.38	8.58e-26
	STK40	-0.33049	0.001141	-1.47983	-0.30599	0.002706	-0.33782	0.000516	-0.22502	0.052262	0.0407969	0.280697
	CCND1	0.25166	0.014414	0.412856	0.26312	0.0104	0.21173	0.032658	0.32571	0.00435	-0.0826535	0.0577848
	EGFR	0.23429	0.023036	0.533107	0.25482	0.01319	0.29291	0.002811	0.1865	0.109127	-0.0601317	0.170151
	ERCC3	0.27933	0.006401	1.72733	0.25605	0.012739	0.20527	0.038483	0.26088	0.023779	-0.0852789	0.011709
	IGF1R	0.31997	0.001668	1.50226	0.34628	0.000629	0.24715	0.012269	0.27976	0.0150627	-0.0598511	0.10475
	MET	0.31924	0.001712	1.01863	0.31662	0.001876	0.30959	0.001544	0.23391	0.043407	-0.0520473	0.190966
	NFKBIA	0.24479	0.017412	0.758388	0.26866	0.008838	0.25585	0.009446	0.17773	0.127122	-0.0912462	0.0110093
	YAP1	0.27999	0.006273	1.30567	0.26016	0.011331	0.16216	0.103456	0.27006	0.019119	-0.0905082	0.0713537
	Blue shading represents genes that are also validated in at least one other VEGFR inhibitor profiling

## Sheet: TableS4b
Uitdehaag et al. (2018) Supplementary Table S4b. Validation of predictive response biomarkers based on gene expression profiles, for reference compounds
	ALK
	Crizotinib
		In-house workflow			CCLE RNA seq		COSMIC		Genentech		PharmacoDB
	Gene	pearson	p-val	Sigma	pearson	p-val	pearson	p-val	pearson	p-val	Score	p-val
	CDK8	-0.31112	0.002272	-1.37116	-0.36	0.000416	-0.26	0.00821	-0.32116	0.004962	0.068806	0.041072
	CRKL	-0.33452	0.000983	-1.13387	-0.25	0.0148	-0.1185	0.235549	-0.27042	0.018952	0.150182	0.418033
	ERCC1	-0.2721	0.007976	-1.5981	-0.32	0.00196	-0.12732	0.202248	-0.27671	0.016249	-0.3933	0.025143
	DIS3	-0.20988	0.042324	-0.93944	-0.17397	0.093546	-0.29	0.00293	-0.2707	0.018826	0.080241	0.676766
	GATA1	-0.27098	0.008248	-1.09664	-0.27	0.00734	-0.33	0.000719	-0.30512	0.007771	0.07073	0.027394
	IL10	-0.29008	0.004567	-1.01723	-0.25	0.0169	-0.26	0.00743	-0.29519	0.010138	0.082887	0.008901
	CD276	0.20965	0.042557	0.304591	0.25	0.0168	0.25985	0.008351	0.26329	0.022473	0.097266	0.243595
	CDH1	0.24014	0.019737	1.03844	0.26	0.0126	0.29521	0.002594	0.28284	0.013941	-0.14506	0.040934
	ERBB2	0.23426	0.023053	1.11644	0.29	0.00518	0.11832	0.236249	0.28754	0.012369	-0.07153	0.035581
	FOXA1	0.26297	0.010446	0.813239	0.29	0.00531	0.22822	0.021052	0.26798	0.020097	0.212646	0.358109
	PIK3R3	0.23869	0.020512	1.39837	0.28148	0.00599	0.15596	0.117523	0.28385	0.013591	-0.0977	0.094155
	PLK2	0.36436	0.000306	1.01261	0.3515	0.000513	0.24282	0.013931	0.34016	0.002827	-0.05481	0.163957
	TMEM127	0.25126	0.014576	0.751504	0.30059	0.00324	0.25746	0.008991	0.29176	0.011091	-0.06797	0.047167
	Compared to results of alectinib, brigatinib, and ceritinib. No blue shading applied because no overlapping validated genes found
	EGFR
	Erlotinib
		In-house workflow			CCLE RNA seq		COSMIC		Genentech		PharmacoDB
	Gene	pearson	p-val	Sigma	pearson	p-val	pearson	p-val	pearson	p-val	Score	p-val
	CCND1	-0.31823	0.00282671	-2.58692	-0.28367	0.00812711	-0.2931	0.00394478	-0.22947	0.056021	0.175371	0.00408701
	EGFR	-0.46986	5.01515e-06	-3.2519	-0.49318	1.4048e-06	-0.4581	3.04095e-06	-0.4675	4.49584e-05	0.299146	2.94041e-16
	EREG	-0.30183	0.00473792	-2.31382	-0.30353	0.00449698	-0.27486	0.00702379	-0.2848	0.0168662	0.222912	0.000336319
	FGFR2	-0.33273	0.001747	-2.08923	-0.34876	0.000998	-0.25468	0.012752	-0.30611	0.009962	0.0983058	0.0556601
	GNA11	-0.29366	0.00606567	-2.50875	-0.26355	0.0142126	-0.17905	0.082539	-0.31414	0.00808919	-0.234693	2.26893e-07
	MET	-0.37001	0.000454209	-2.68479	-0.35761	0.000724063	-0.32036	0.00155066	-0.26552	0.0263163	0.29979	3.31058e-05
	NFE2L2	-0.27278	0.0110521	-1.91773	-0.30714	0.00402088	-0.2701	0.00811651	-0.30458	0.0103572	0.142592	0.0027903
	NFKBIA	-0.31781	0.00286492	-2.21155	-0.2669	0.0129873	-0.32137	0.00149565	-0.234	0.051208	0.152719	0.00144823
	PLK2	-0.40636	0.000103532	-2.96153	-0.38369	0.000265546	-0.33213	0.0010083	-0.3132	0.00829119	0.309642	2.0282e-05
	RAC1	-0.34981	0.00096184	-3.06996	-0.39653	0.000157023	-0.42093	2.16141e-05	-0.29247	0.0140142	0.160234	0.013712
	SMAD3	-0.46935	5.15135e-06	-3.38415	-0.43449	2.91608e-05	-0.38567	0.000113526	-0.35396	0.00264633	0.232772	0.000141401
	YAP1	-0.31029	0.00364255	-2.10621	-0.2956	0.00572404	-0.34033	0.000739374	-0.28151	0.0182357	0.259506	0.000487952
	YES1	-0.30782	0.003937	-2.4483	-0.35019	0.000948	-0.27907	0.006169	-0.36801	0.001722	0.0639922	0.264958
	CCND3	0.31458	0.003178	2.91828	0.31188	0.003464	0.28399	0.005287	0.26412	0.027146	-0.0684197	0.152068
	FIP1L1	0.24983	0.02035	2.36666	0.24635	0.022227	0.39918	6.15e-05	0.29815	0.01218	0.0819159	0.15747
	IKZF1	0.2996	0.005072	2.58678	0.27996	0.009036	0.1917	0.062734	0.26653	0.025725	0.661357	0.405514
	KLHL6	0.2587	0.016171	2.51228	0.24787	0.021391	0.21387	0.037425	0.26625	0.025889	-0.0751244	0.103499
	MDM4	0.29477	0.005867	2.13614	0.18509	0.087991	0.31453	0.001907	0.2939	0.013532	0.201987	0.228813
	PIK3R1	0.39183	0.000191	2.39989	0.28652	0.007483	0.35557	0.000406	0.30991	0.009033	0.156724	0.405908
	Blue shading represents genes that are also validated from osimertinib or gefitinib profiling
	Gefitinib
		In-house workflow			CCLE RNA seq		COSMIC		Genentech		PharmacoDB
	Gene	pearson	p-val	Sigma	pearson	p-val	pearson	p-val	pearson	p-val	Score	p-val
	BCR
	CDH1	-0.39929	0.000116368	-3.42392	-0.40459	9.24117e-05	-0.27602	0.00620831	-0.30214	0.0104424	0.184079	1.81448e-05
	EGFR	-0.36392	0.000491513	-2.74974	-0.38974	0.000174449	-0.32545	0.0011427	-0.36199	0.00192257	0.324439	1.39478e-15
	EPCAM	-0.34543	0.000980194	-2.94041	-0.32395	0.00207761	-0.23415	0.020978	-0.26272	0.026868	0.181464	4.78989e-05
	ERBB2	-0.36472	0.000476445	-2.28089	-0.39992	0.000113206	-0.34201	0.000606351	-0.32767	0.00527957	0.117736	0.00207171
	ERBB3	-0.29341	0.00552943	-2.36007	-0.31277	0.00300856	-0.26631	0.0083743	-0.18895	0.114545	0.124322	0.00427966
	FGFR2	-0.37111	0.000371483	-2.38008	-0.35636	0.000654904	-0.33931	0.000674101	-0.28401	0.0163812	0.104022	0.00282349
	FGFR3	-0.42455	3.74892e-05	-2.62764	-0.50825	4.29976e-07	-0.39815	5.37294e-05	-0.46901	3.69836e-05	0.14117	6.36582e-05
	FOXA1	-0.32165	0.002245	-2.85998	-0.28871	0.006373	-0.29297	0.003589	-0.23771	0.04592	0.082638	0.0474449
	NFE2L2	-0.24445	0.021718	-1.7072	-0.24701	0.020336	-0.28726	0.004332	-0.18331	0.125981	0.0810293	0.0344467
	NFKBIA	-0.47801	2.48e-06	-3.20697	-0.47557	2.84e-06	-0.39143	7.35e-05	-0.34074	0.003641	0.0935341	0.00611579
	TP63	-0.29545	0.00519669	-1.64144	-0.34462	0.00100911	-0.36607	0.000226449	-0.28777	0.0149543	0.2016	9.75867e-07
	VTCN1	-0.32415	0.002064	-1.92409	-0.36882	0.000406	-0.2873	0.004326	NA	NA	0.092084	0.0116067
	ARAF	0.23283	0.029034	1.92051	0.2507	0.018479	0.20117	0.048172	0.25541	0.031576	-0.076011	0.0391788
	BAP1	0.29979	0.00454476	2.55162	0.25801	0.0152232	0.27138	0.00717092	0.08197	0.49677	-0.0966856	0.0176397
	CCND3	0.30505	0.003853	2.8801	0.28819	0.006472	0.24709	0.01469	0.26838	0.023637	-0.0410458	0.274218
	ERCC1	0.23248	0.029286	2.0543	0.34342	0.001054	0.27585	0.006241	0.2446	0.039805	-0.0339128	0.310871
	ETV1	0.3083	0.003475	2.00369	0.27763	0.008823	0.34189	0.000609	0.21663	0.069588	-0.0912409	0.0189728
	MLH1	0.28351	0.007435	1.62123	0.30154	0.004303	0.25065	0.013275	0.3499	0.002779	-0.083027	0.0373307
	PIK3R1	0.30589	0.003752	1.77906	0.22416	0.035766	0.3012	0.002718	0.24954	0.035843	0.0328139	0.390933
	Blue shading represents genes that are also validated from osimertinib or erlotinib profiling
	Afatinib
		In-house workflow			CCLE RNA seq		COSMIC		Genentech		PharmacoDB
	Gene	pearson	p-val	Sigma	pearson	p-val	pearson	p-val	pearson	p-val	Score	p-val
	CDH1	-0.32532	0.00198345	-2.71502	-0.34025	0.0011804	-0.25669	0.0111472	-0.26918	0.0232081	0.17	9.32e-05
	EGFR	-0.39965	0.000114562	-2.77194	-0.38731	0.000193021	-0.33272	0.00086892	-0.34512	0.00320311	0.23	3.72e-09
	ERBB2	-0.32411	0.00206647	-1.98743	-0.34118	0.00114187	-0.27939	0.00558192	-0.22247	0.062215	0.29	2.18e-15
	FGFR2	-0.37833	0.000279	-2.37737	-0.35055	0.000813	-0.32384	0.001213	-0.28643	0.015451	-0.0706237	0.047209
	FGFR3	-0.38921	0.000178	-2.16818	-0.43442	2.35e-05	-0.38511	9.82e-05	-0.37636	0.001217	-0.152733	0.352475
	NFKBIA	-0.44412	1.46e-05	-2.84415	-0.43343	2.46e-05	-0.40431	4.01e-05	-0.24583	0.038785	0.0572669	0.1247
	NFE2L2	-0.22317	0.036616	-1.52545	-0.23356	0.028522	-0.28935	0.004046	-0.2494	0.035952	0.0531834	0.162559
	TP63	-0.38241	0.000236124	-1.98956	-0.43007	2.89097e-05	-0.37402	0.000160763	-0.37768	0.00116604	0.13	0.0011
	AR	0.21384	0.045439	1.09938	0.21001	0.049549	0.2852	0.004633	0.25391	0.032628	0.1295	0.41281
	DDR2	0.26895	0.0112838	1.77567	0.25495	0.016519	0.16011	0.11722	0.24816	0.0369133	-0.12	0.008
	ETV1	0.27214	0.0103183	1.72097	0.24686	0.0204127	0.31616	0.0016061	0.23625	0.047307	-0.11	0.005
	MLH1	0.22789	0.032729	1.25675	0.27054	0.010794	0.17713	0.082631	0.29211	0.013442	-0.0831921	0.0343015
	PIK3R1	0.3466	0.000939	2.0445	0.27862	0.008574	0.28004	0.005467	0.23159	0.051977	0.280509	0.106179
	No blue shading applied
	HER2
	Lapatinib
		In-house workflow			CCLE RNA seq		COSMIC		Genentech		PharmacoDB
	Gene	pearson	p-val	Sigma	pearson	p-val	pearson	p-val	pearson	p-val	Score	p-val
	EGFR	-0.36319	0.000505447	-2.8004	-0.34626	0.000950916	-0.28259	0.00503939	-0.27795	0.0189278	0.325562	6.61055e-06
	ERBB2	-0.32832	0.00179075	-2.14379	-0.31821	0.00251647	-0.28388	0.00483378	-0.23784	0.045793	0.565698	3.13947e-33
	FGFR3	-0.28104	0.00799185	-1.60167	-0.33043	0.00166559	-0.33972	0.000663338	-0.37085	0.00145412	0.175986	0.000125187
	FOXA1	-0.26157	0.0138284	-2.54149	-0.23739	0.025945	-0.28785	0.00424951	-0.2637	0.0262818	0.380821	7.91993e-13
	HNF1A	-0.28767	0.006573	-2.06516	-0.25214	0.017792	-0.10253	0.317646	-0.41984	0.000268	-0.2098	0.197403
	NFKBIA	-0.38295	0.000230993	-2.75625	-0.34684	0.000931151	-0.3268	0.00108674	-0.23388	0.049645	0.121437	0.00973846
	RAC1	-0.23118	0.0302282	-2.39143	-0.25844	0.0150503	-0.29718	0.00311643	-0.10424	0.386972	0.173966	0.00511815
	SRC	-0.30301	0.00411	-2.11818	-0.25924	0.01473	-0.32772	0.00105	-0.2739	0.020811	0.0787737	0.08727
	TP63	-0.28408	0.00731069	-1.5758	-0.33815	0.00127189	-0.28072	0.00535054	-0.18316	0.126286	0.165795	4.06703e-05
	DDR2	0.27832	0.00864868	1.8889	0.28734	0.00663842	0.12627	0.217789	0.29706	0.0118798	-0.187042	0.000224956
	ETV1	0.28818	0.00647505	1.93908	0.27548	0.00938249	0.33805	0.000707942	0.24563	0.038945	-0.260809	6.10987e-06
	PIK3R1	0.3106	0.003227	1.84309	0.27992	0.008257	0.31187	0.001873	0.25318	0.033148	0.42986	0.0161964
	Blue shading represents genes that are also validated from neratinib profiling
	Herceptin
		In-house workflow			CCLE RNA seq		COSMIC		Genentech		PharmacoDB
	Gene	pearson	p-val	Sigma	pearson	p-val	pearson	p-val	pearson	p-val	Score	p-val
	CDK12	-0.64276	2.5244e-11	-4.41352	-0.6522	1.0276e-11	-0.3912	8.85896e-05	-0.21995	0.06938	NA	NA
	ERBB2	-0.70294	4.5e-14	-4.61497	-0.49991	9.55825e-07	-0.37789	0.000159686	-0.13134	0.282036	NA	NA
	NBN	-0.34519	0.00113404	-1.913	-0.41264	7.87545e-05	-0.27524	0.00694248	0.04671	0.703135	NA	NA
	VTCN1	-0.51051	5.12395e-07	-3.04669	-0.52977	1.56205e-07	-0.25033	0.0144152	NA	NA	NA	NA
	RAD51D	0.26442	0.013886	2.38733	0.26209	0.0147785	0.26914	0.008354	0.02128	0.862213	NA	NA
	No PharmacoDB data available
	No blue shading applied
	MEK
	Trametinib
		In-house workflow			CCLE RNA seq		COSMIC		Genentech		PharmacoDB
	Gene	pearson	p-val	Sigma	pearson	p-val	pearson	p-val	pearson	p-val	Score	p-val
	ETV4	-0.29741	0.00570606	-2.18664	-0.39403	0.000190643	-0.29328	0.00412126	-0.4232	0.00029126	0.15105	0.00237071
	ETV5	-0.32956	0.002071	-1.81514	-0.36984	0.000495	-0.23446	0.02293	-0.41479	0.000395	0.104406	0.0417472
	TGFBR1	-0.25927	0.016573	-1.63598	-0.26802	0.01314	-0.30241	0.003052	-0.18579	0.126415	0.0423914	0.390662
	AKT2	0.32253	0.0026089	2.52359	0.36004	0.00071293	0.35783	0.000398807	0.37879	0.00132987	-0.101677	0.0472707
	ARID5B	0.27625	0.010492	2.27373	0.2093	0.054553	0.34036	0.000789	0.35458	0.002796	-0.0742879	0.137739
	BARD1	0.24937	0.0213602	2.04182	0.19157	0.0790272	0.36988	0.000243319	0.49058	1.87492e-05	-0.219284	1.41066e-05
	BCL6	0.32196	0.00265779	1.8891	0.36959	0.000499345	0.20012	0.053129	0.29034	0.0155191	-0.150116	0.00218677
	PIK3R3	0.24019	0.0268174	1.42755	0.21704	0.046019	0.29908	0.0034089	0.3044	0.0109901	-0.160978	0.00384533
	TP53	0.27642	0.010441	1.64211	0.2806	0.009291	0.19338	0.061841	0.25961	0.031225	-0.0760763	0.119435
	Blue shading represents genes that are also validated from cobimetinib profiling
