# Supplementary material for: Combined Cellular and Biochemical Profiling to Identify Predictive Drug Response Biomarkers for Kinase Inhibitors Approved for Clinical Use between 2013 and 2017
Source: Oxford University Press journal article supplement (doi:10.1158/1535-7163.mct-18-0877), 2018-10-31
Supplement: 15357163mct180877-sup-206465_2_supp_5070872_pfzh5r.xlsx [file 15357163mct180877-sup-206465_2_supp_5070872_pfzh5r.xlsx]

## Sheet: TableS3a_cell_panel_IC50data
Uitdehaag et al. (2018) Supplementary Table S3a. Cell panel data. IC50s (in nM) in cell proliferation assays, except for Herceptin which is given in ng/ml. For details see www.ntrc.nl. Data were stripped of "> " sign for biomarker analysis.
*Compound has been approved prior to the current study, but was profiled as a reference
	Abemaciclib	Acalabrutinib	Alectinib	Brigatinib	Ceritinib	Cobimetinib	Copanlisib	Ibrutinib	Idelalisib	Lenvatinib	Midostaurin	Neratinib	Nintedanib	Osimertinib	Palbociclib	Ribociclib	Tivozanib	Afatinib*	Crizotinib*	Erlotinib*	Gefitinib*	Herceptin*	Lapatinib*	Trametinib*
5637	1891.6		2187.85	1124.33	2490.25	452.09	247.634	471.685	>31600	>10000	958.074	448.257	4185.13	869.789	4783.71	15576.6	>31600	15.8748	1871.12	537.405	528	>10000	2220.05	297.215
769-P	420.676	>31600	9151.63	1909.7	2846.94	422.532	296.877	624.271	>31600	>31600	551.116	945.393	3642.49	1562.09	179.198	2475.91	>31600	1801.59	2585.31	11780.4	260	>10000	175.844	94.7229
786-O	864.576	>31600	>10000	2074.27	3278.04	205.377	848.333	446.941	13926.7	>31600	1143.66	1957.31	4067.36	2611.03	158.022	311.046	31083	2217.6	2887.55	115.68	11307	>10000	10507.2	41.8216
A-172	2609.6	>31600	>10000	888.32	3938.91	218.467	323.261	>31600	>31600	2379.34	440.583	3287.19	3806.7	3659.46	4794.03	12226.7	18000.1	2645.15	2396.54	>31600	13913	>10000	13737.6	235.344
A-204	747.703	>31600	>10000	1271.45	2678.79	900.071	10.6667	29184	2615.6	38.9854	333.526	1330.46	9.12829	1043.98	238.305	202.849	40.845	1650.39	777.69	4757.9	9866	>10000	10813.5	1230.62
A375	158.626	>31600	>10000	719.221	1608.01	12.6796	137.925	>31600	11511.5	>31600	732.77	1443.49	3798.75	3230.01	237.497	7238.72	29196.6	2453.57	1947.14	3977.95	11355	>10000	19743.1	4.78489
A388	704.349	>31600	2055.23	1233.25	3642.52	171.121	31.3437	252.61	20571.5	>31600	2392.12	203.499	3601.8	480.004	4365.81	20241.4	>31600	194.733	3041.9	686.165	159	>10000	1200.95	99.3577
A-427	65.9581		>10000	447.655	1454.44	72.4889	22.8566	7613.17	17865.1	95.0642	298.395	1391.87	477.846	2480.71	35.5197	260.907	9300.39	2797.45	1151.81	2758.12	7808	>10000	12692.9	2.13041
A-498	950.069	>31600	>10000	1862.34	4166.29	3910.04	126.041	10123	414.421	>31600	641.904	913.735	4860.74	1957.13	1885.07	1169.41	30506.7	8.74534	2554.78	102.998	5809	>10000	260.507	13797
A-549	208.076	>31600	>10000	892.66	4563.54	255.194	184.921	>31600	>31600	>31600	571.321	79.3014	7389.49	5744.8	4597.41	708.443	27064.6	4299.65	2336.3	1080.12	19667	>10000	674.673	70.7346
A-704	1538.51	>31600	>10000	3593.96	6188.13	>10000	84.1484	>31600	>31600	>31600	658.417	1986.68	5090.28	3919.56	9363.52	30524.2	>31600	4815.22	4454.31	2121.95	12928	>10000	26485.9	>28165
ACHN	222.55	12604.2	3520	893.878	4778.05	104.443	33.0243	674.747	14917.7	16804.9	685.817	288.674	3443.66	389.7	305.171	95.9924	18596.2	4.14963	3711.09	658.595	379	>10000	303.587	5.82728
AN3 CA	1196.61	>31600	>10000	1862.16	4138.21	558.293	33.258	12670.2	10431.4	126.756	792.07	2927.13	555.81	4264.81	4578.35	806.266	2693.9	3158.4	2245.78	2181.21	14014	>10000	12845.5	50.2386
AsPC-1	3332.4	>31600	>10000	809.029	1345.2	61.2879	43.8625	>31600	>31600	>31600	8954.05	1672.04	4502.58	4599.54	8936.47	19151.4	>31600	404.906	2703.5	129.135	12547	>10000	12792.8	13.9203
AU-565	379.703	684.633	>10000	2575.59	3259.82	>10000	25.9845	41.991	24231	28804.4	1311.6	17.0619	3824.08	118.016	7431.86	>31600	26505.2	27.2965	6527.03	4179.76	576	90.1242	294.249	>28165
BL-70	310.402	>10000	6427.13	2706.03	2532.73	>10000	125.569	2247.31	>31600	7764.1	552.724	1342.85	1667.96	1232.69	628.694	1987.86	3793.16		1500.07
BT-20	13452	>31600	>10000	4213.62	6050.01	>10000	26.5097	>31600	>31600	>31600	1038.77	5155.38	17914.4	10676.1	14349.4	>31600	27703.3	4104.27	10679.1	>31600	26607	>10000	15208.1	>28165
BT-474	11178.1	1368.03	>10000	1918.19	3110.09	>10000	50.0803	38.2457	>31600	>31600	4187.17	10.4669	3473.31	58.7066	>10000	>31600	>31600		7437.72
BT-549	3799.74	>31600	2707.55	3010.17	3832.06	5714.73	330.175	17487.9	15672.5	6292.26	1077.57	1973.93	3926.67	3484.84	8667.99	9971.72	27700.4	1816.77	3410.03	26810.3	14027	>10000	11520.4
BxPC-3	1755.14	>31600	>10000	619.205	1703.76	9.74591	98.0801	1406.65			654.992	51.4545	3204.66	93.5104	4912.87	532.858	>31600	26.1332	2674.29	5800.48	5117	>10000	11997.9	37.9164
C-33 A	237.389	2008.64	1989.93	527.338	4457.08	43.2881	239.67	46.2629	25902.8	9923.76	718.974	40.2864	1842.18	153.747	5537.77	20845.2	21796.7	36.2709	6376.39	494.929	497	229.843	257.841	4.4199
CAL 27	2274.19	>31600	1179.98	672.969	3022.19	63.1232	79.9045	374.36	27258.4	>31600	1682.55	75.7267	2772.19	288.995	4493.13	1605.23	29781.2	6.04417	1653.13	175.394	38		879.262	10.9145
CCF-STTG1	5043.57	>31600	3022.3	3442.06	4496.02	>10000	664.67	>31600	>31600	>31600	885.47	4297.76	6367.11	7184.78	11932.4	27263.9	>31600	5599.69	6556.1	>31600	21553	>10000	22513.5	>28165
CCRF-CEM	1214.68	>31600	>10000	3604.06	3891.43	8480.06	31.7604	8435.59	11457.8	>31600	627.291	2564.9	3859.01	3600.34	159.05	598.2	18957.3	1118.54	2103.05	8926.42	11871	>10000	11159	>28165
COLO 205	436.722	>31600	>10000	997.951	1884.02	10.3068	201.005	>31600	>31600	>31600	682.637	2000.41	4844.42	3427.77	132.173	3046.89	19741.9	2055.77	1885.31	>31600	11939	>10000	17025.9	3.91571
COLO 829	4837.08	>31600	>10000	2559.88	3260.4	27.5295	841.679	>31600	>31600	>31600	6125.15	3163.27	6677.1	3832.47	7748.73	24123.9	>31600	4575.31	4022.99	>31600	14166	>10000	13206.4	16.1371
Daoy	5840.49	>31600	3452.11	3070.95	4950.68	>10000	91.092	23104	>31600	23533.7	516.326	603.763	4334.12	4867.79	9497.31	24770.5	>31600	2633.44	2337.59	5229.39	11663	>10000	18384.3	426.61
DB	1444.6	>31600	>10000	2928.99	3985.94	8687.65	990.629	21406.6	>31600	27874.8	584.837	1863.87	3922.9	2217.84	3570.03	7071.54	22304.8	741.494	2849.13	>31600	11598	>10000	12375.4	18943.2
DLD-1	4359.37	>31600	>10000	4725.18	4380.07	724.309	55.53	>31600	>31600	>31600	1596.27	2483.93	5079.79	4212.76	7250.15	27306.2	>31600	2382.14	4722.04	>31600	10524	>10000	14633.5	506.98
DOHH-2	846.562	>10000	7665.36	1096.68	2472.98	7398.95	60.1912	1453.1	2839.08	5615.02	592.221	1042.03	1442.91	1315.73	787.221	1026.6	4424.28		1354.27
DoTc2 4510	1203.51	9830.73	477.255	270.467	1189.59	42.0514	42.9766	208.815	9801.8	10375	939.682	38.6189	3787.86	75.5741	5877.84	17467.4	28470.3	3.65359	2000.84	125.918	42	>10000	340.698	7.8616
DU 145	3391.07	>31600	>10000	667.4	3852.19	56.4283	56.012	147.783	6306.22	10749.1	477.169	186.053	4321.98	272.491	8688.86	23306.6	23620.9	15.6749	3300.88	210.907	173	>10000	529.534	75.9288
DU4475	4690.45	>31600	>10000	1789.11	2182.66	17.0587	550.402	20119.4	>31600	>31600	501.221	4311.2	3908.87	4542.62	11189.4	9984.02	25474.9	4125.68	2052.12	20590.3	15893	>10000	5835.06	10.4566
ES-2	436.425	>31600	>10000	2093.57	2806.21	32.2704	633.863	29834.4	>31600	5787.4	2213.87	636.777	2393.6	1718.27	208.454	829.582	30469.2	851.718	2620.02	3337.91	13368	>10000	12026.8	7.32779
FaDu	468.446	28477.7	>10000	970.709	3248.85	145.591	73.6216	95.2075	>31600	6956.42	866.73	87.1335	4457.79	256.997	1094.31	6647.77	30569.3	2.87945	4109.43	403.854	155	>10000	245.017	18.5993
G-361	70.7057	>31600	>10000	9283.04	1513.26	10.7818	96.8327	>31600	30277.1	>31600	3140.55	871.243	2539.86	1115.17	5232.99	19018.8	>31600	2028.38	3311.77	4004.26	5384	>10000	11027	5.46471
HCT 116	193.22	>31600	>10000	1690.04	2718.96	106.095	23.5885	26394.6	25154.1	9975.68	1434.48	1116.96	2395.12	1557.73	3542.14	6464.66	20194.5	1112.55	1809.06	4947.46	10969	>10000	13728.2	29.0014
HCT-15	3113.38	>31600	>10000	3767.5	3812.64	3576.81	123.369	>31600	28539.5	14904	1117.03	2325.59	5352.34	3771.74	4839.4	15192.5	>31600	1871.87	3761.43	14684.7	11333	>10000	11829.4	1740.5
HL-60	113.317	>31600	>10000	1113.3	951.002	18.6545	13.6609	29660	>31600	>31600	4528.22	2037.11	4683.51	1492.02	25.672	161.929	30011.7	2016.36	1414.67	8020.07	15824	>10000	13462.6	0.974208
Hs 578T	4253.74	>31600	4917.76	1394.3	4067.77	2215.52	134.82	15078.7	20493.7	613.007	599.211	736.218	2677.94	3560.89	6123.93	19143.2	28487.3	2526.25	917.997	5103.11	13174	>10000	15207.1	210.651
Hs 746T	1581.77	9683.07	>10000	2135.48	3338.44	530.39	40.2317	30698.1	28704.8	11141.3	1657.25	785.922	2914.64	1977.78	21.465	1175.8	>31600	3267.74	14.7816	802.314	9246	>10000	13426	81.9505
Hs 766T	238.906	>31600	>10000	2535.57	3519.86	6.02491	136.255	>31600	4188.29	>31600	1513.19	3822.31	3624.35	2764.25	4568.8	11721.1	>31600	4158.68	3604.95	>31600	19430	>10000	17135	2.3436
HT	5336.17	>31600	>10000	4537.19	4738	>10000	139.527	902.053	27923.7	>31600	4809.87	4418.71	5343.55	3949.41	6421.22	9588.95	>31600	859.938	3167.29	>31600	17582	>10000	13148.9	>28165
HT-1080	18.2682	>31600	7551.92	1663.89	2000.81	67.8454	277.579		8338.03	>10000	329.944	574.386	2835.7	3038.9	125.565	1221.62	>31600	2541.12	1497.75	3482.1	9538	>10000	10727.8	28.0757
HuTu 80	158.337	>31600	>10000	451.141	1666.08	319.472	70.8595	3662.76	9823.19	2774.77	354.939	1521.72	1435.82	2130.29	75.2355	175.789	7184.92	3524.33	821.169	13841.6	2607	>10000	12783.8	88.3048
J82	4463.66	>31600	>10000	1881.07	4502	85.3857	132.558	25502.6	>31600	>31600	1971.81	2660.77	5363.49	5514.44	12011.6	12328.8	25737.1	3740.9	4884.75	2590.77	14053	>10000	18157.5	>28165
JAR	787.785	>31600	>10000	3047.56	3578.84	6287.81	817.286	23676.3	12181	15153.3	560.757	1332.35	3699.87	2281.95	3434.8	13440.5	16662.6	1916.89	1376.54	20325.5	9217	>10000	10960.4	>28165
JM1	105.751	>10000	>10000	1115.38	3460.67	>10000	107.846	>10000	>31600	1062.16	536.764	3328.69	2400.01	3008.83	650.26	2250.24	22471.1		1703.33
Jurkat E6.1	535.947	29605.5	>10000	4383.33	4073.72	>10000	285.371	10814	24300.9	29855.5	2451.38	1748.37	3678.9	2270.76	234.68	1787.02	18988.2	1808.11	1334.78	18775	12498	>10000	10548.4	>28165
K-562	137.599	>31600	>10000	2738.11	3974.27	73.3603	380.715	7324.28	22798.8	3242.12	1898.36	2385.39	254.742	1458.58	4007.5	15086	526.687	2720.64	284.864	6459.05	10804	>10000	12216.6	21.7481
KATO III	169.443	31255.8	>10000	210.855	2360.52	290.758	21.2535	1037.81	23590.4	44.6979	423.573	505.192	132.951	2496.2	58.3646	9763.65	585.387	1909.88	1984.32	3756.47	8944	>10000	10940.1	141.909
KG-1	51.9081	>31600	441.538	242.669	3852.96	26.1463	717.241	1355.28	>31600	73.1154	427.034	515.015	308.045	210.414	669.685	11441.9	1532.85	3239.06	564.29	3055.63	11712	>10000	18542.7	8.9113
KLE	190.545	>31600	>10000	552.505	3578.44	>10000	15.8271	75.3698	18702	21842.7	2299.81	44.0161	3905.58	148.868	10618.2	10087.1	>31600	0.840146	9675.03	1086.51	286	>10000	16661.2	>28165
KU812	224.018	>31600	>10000	1389.7	1884.2	63.5609	1030.15	2806.35	>31600	2996.72	1357.65	3046.4	334.079	1891.47	35.1454	2720.49	548.5	1394.04	269.429	14993.3	12907	>10000	12351.7	13.4261
LNCaP FGC	34.1326	>31600	>10000	688.595	3720.33	9636.34	362.248	>31600	949.144	9350.84	>31600	5924.67	1798.04	4554.7	12836.6	766.116	>31600	7108.85	6398.25	>31600	20701	>10000	21069.3	>28165
LoVo	302.854	>31600	>10000	2016.33	3471.58	118.286	276.968	>31600	25597.7	>31600	745.339	58.305	4025.24	3786.13	3387.19	160.505	25749	2309.22	1401.72	577.896	213		337.664	32.0967
LS 174T	307.312	>31600	>10000	1333.29	2004.01	24.6842	114.515	11618.2	>31600	>31600	726.848	3040	3772.8	2708.97	93.3548	396.354	22663.6	89.002	1507.24	16631.5	5604	>10000	109.129	29.7683
LS411N	842.673	>31600	>10000	1764.71	1965.29	21.1743	374.158	22992.1	>31600	>31600	1237.58	3744.81	4068.4	6019.13	63.4391	2143.68	24834.6	1149.9	2447.85	>31600	19534	>10000	18008.1	9.3919
MCF7	947.192	>31600	>10000	601.449	2768.7	8552.18	58.0353	>31600	>31600	>31600	3266.72	>10000	13657.2	10162.7	14222.1	>31600	>31600	11879.8	3758.12	>31600	18458	>10000	18891.7	>28165
MDA-MB-231	585.165	>10000	>10000	1267.77	4127.55	143.95	1465.87	>10000	>31600	>31600	1152.39	3755.38	5549.64	4639.28	>10000	4556.19	>31600		4296.83
MeWo	77.3047	>31600	>10000	>10000	3195.61	329.739	128.916	29117.6	>31600	>31600	2757.8	3149.9	4110.87	3833.81	84.5863	4116.81	>31600	4279.12	3595.51	>31600	12716	>10000	15527.3	35.6999
MG-63	84.6662	>31600	>10000	1052.42	3042.28	420.609	56.8318	>31600	21433.5	1054.22	628.714	3604.24	3959.24	4409.95	69.5297	164.463	27901.8	3338.6	2620.58	>31600	13291	>10000	13191.2	256.73
MIA PaCa-2	576.386	>31600	>10000	1189.22	2186.68	68.3866	258.922	>31600	>31600	>31600	1639.88	3643	3727.61	2613.96	4983.87	9055.67	23950.3	2292.28	1612.2	1428.46	13841	>10000	16957.3	33.0975
MOLT-4	815.885	>31600	>10000	1949.15	3755.8	>10000	60.0641	1877.31	18743.2	28251.8	600.942	2469.62	3696.31	2859.02	284.531	2030.62	10957.8	1264.1	640.875	>31600	11681	>10000	11431.6	27623.7
NCCIT	359.772	>31600	> 3160	2683.4	3108.67	1286.2	165.598	5101.43	24463.8	2501.83	767.155	2317.37	3291.37	2740.76	4554.37	7399.26	9706.76	1752.67	1469.05	>31600	15822	>10000	18075.3	870.545
NCI-H460	314.233	>31600	>10000	1377.17	3155.67	76.8862	77.8495	>31600	13642	>31600	520.858	2371.27	5559.67	5390.94	262.024	425.816	19661.6	2933.15	2501.18	29092.6	14906	>10000	22342.3	32.7309
NCI-H661	>1000	10964.9	>10000	402.179	3465.59	>10000	79.8031	122.892	>31600	>31600	528.054	2298.22	5334.64	4806.38	8300.95	>31600	>31600	12.3623	6615.25	>31600	19765	>10000	15207.9
NCI-H82	3949.99	>31600	>10000	1978.53	1570.95	8222.2	338.036	18444.2	>31600	18804.7	782.376	2165.59	4193.79	4151.17	5972.4	19995.4	20601.2	2679.02	1594.33	>31600	10106	>10000	12442.8	>28165
OVCAR-3	2196.26	>31600	>10000	939.338	5140.63	>10000	85.3924	199.934	5430.39	>31600	2106.11	1115.57	13699.8	3129.63	13955.6	>31600	>31600	1308.84	7278.7	8789.29	134	>10000	>31600	>28165
PA-1	668.126	>31600	7916.6	918.177	2078.31	495.723	543.802	12656.9	>31600	>31600	481.126	959.873	2577.35	1442.67	1543.74	4847.2	21452.6	2596.81	797.164	13957.3	7637	>10000	11143.8	665.92
PC-3	3354.24	>31600	>10000	2016.8	4055.11	>10000	189.935	>31600	30589.2	>31600	1338.32	5442.84	14388.1	9360.55	5500.97	1111.57	>31600	4648.11	2844.55	>31600	19273	>10000	11929.8	>28165
PFSK-1	3831.15	>31600	3485.11	591.927	1536.32	>10000	88.7598	25647.5	>31600	27275.4	2054.31	2926.77	3795.04	3885.8	10044.1	23613.8	>31600	2575.74	2155.93	>31600	14512	>10000	10956.9	>28165
RD	2424.43	>31600	>10000	1015.44	1709.93	91.5969	122.601	29081.2	15136.6	>31600	745.735	937.534	2009.83	2512.02	4154.12	18949.2	>31600	1905.89	2274.38	4180.2	11162	>10000	16624.4	4.01683
RKO	92.9518	>31600	>10000	3461.77	1627.7	38.4214	81.1867	>31600	>31600	8478.8	1762.66	2238.17	3257.04	3582.12	2436.62	4556.45	28413.6	2716.85	1901.17	>31600	8273	>10000	8227.34	8.39893
RL	777.595	>31600	>10000	5833.83	4058.81	>10000	289.444	3053.89	8806.62	10331.8	2892.81	4373.11	3686.38	3916.31	146.378	339.564	8856.59	1899.61	2633.43	>31600	13089	>10000	11895.6
RL95-2	1267.3	>31600	1326.05	651.921	1757.38	34.1149	132.972	32.3369	11671.7	11615.4	706.629	230.352	4368.02	49.5919	7163.59	14471.8	27375.5	4.61451	1265.8	137.89	35	>10000	109.519	1.55478
RPMI-7951	689.874	>31600	>10000	1278.02	3675.25	20.0348	128.972	26921.4	5782.18	>31600	567.677	2809.77	3524.88	3630.29	1592.39	885.229	22218.9	3598.23	2086.99		11169	>10000	12214.1	16.7812
RS4-11	642.388	>31600	>10000	473.173	1075.52	>10000	12.257	>31600	25827.2	>31600	492.817	1512.46	4129.94	2202.45	163.509	2413.28	18321.8	2329.9	782.649	>31600	15495	>10000	13102	>28165
RT4	9.75367	>31600	>10000	253.645	4049.62	299.043	467.01	3470.02	>31600	77.0415	1231.61	9.98738	890.357	65.3811	18.2207	73.9665	10884.1	9.59104	3562.2	1314.86	149	>10000	273.734	71.8782
SHP-77	3545.06	>31600	>10000	5192.03	3401.63	>10000	1031.99	>31600	>31600	>31600	2184.2	4197.52	5779.18	6743.42	9844.2	>31600	>31600	3766.5	3384.22	>31600	18780	>10000	18131.9	>28165
SJCRH30	4115.52	>31600	>10000	463.73	1013.84	3409.02	78.4362	25701.8	17673.5	23440.4	1552.14	3254.84	3858.15	3964.38	5585.33	20341.7	21635.7	2507.13	1573.59	>31600	13806	>10000	12127	236.907
SK-N-AS	19.2748	>31600	7730.39	617.583	2092.1	12.2573	25.3258	>31600	>31600	>31600	635.121	803.2	3550.84	2351.02	70.8759	216.817	>31600	1929.41	1842.12	5532.48	14521	>10000	15494	3.80986
SK-N-FI	36.1519	>31600	7436.73	1093.36	536.735	81.8069	109.288	>31600	11026.2	>31600	918.922	1034.88	2936.9	3229.48	13.6394	250.742	>31600	1913.85	2165.56	7845.85	16527	>10000	19990.6	33.518
SNU-5	3972.68	>31600	>10000	2150.99	3865.56	47.2903	214.589	17612.7	21385.9	7584.23	1703.21	799.087	3063.19	2562.09	35.6628	89.023	30225.1	3881.99	11.088	3595.42	12163	>10000	17265.7	12.0955
SNU-C2B	570.893	>31600	>10000	741.106	2540.29	324.1	20.4097	300.397	>31600	>31600	3352.85	4532.43	5548.5	2420.54	9839.27	26716.4	>31600	264.736	4803.85		82	>10000	8395.01	40.6745
SR	301.267	14683.7	328.358	20.0396	200.333	508.504	425.298	13221.3	12084.2	25357.7	410.579	1632	2505.11	1701.66	91.0224	836.073	13593.5	1208.38	193.677	>31600	11192	>10000	3714.8	935.846
SU-DHL-1	1684.66	>31600	431.696	34.9396	191.806	477.848	1054.26	>31600	17470.6	30765.8	1890.94	3515.57	2798.4	2433.78	1295.13	4257.98	14418.9	2843.95	181.663	>31600	8185	>10000	6478.08	279.11
SU-DHL-5	1703.08	>10000	6180.88	1370.41	1881.13	3179.5	37.4198	1737.21	2150.91	15722.9	626.501	3759.58	3352.93	1784.05	2677.63	3312.41	11553.9		1322.11
SU-DHL-6	246.276	3.10252	>10000	1341.54	2945.61	2017.07	4.0974	11.8984	13.2586	15267.8	843.934	1804.58	3696.41	1816.18	54.5905	400.77	8336.25	861.63	2187.3	>31600	11269	>10000	9009.88	27.4523
SUP-T1	343.616	>31600	>10000	1479.96	3495.92	>10000	43.9404	1314.24	>31600	>31600	6630.65	3429.47	4531.59	4961.7	113.561	891.2	9433.52	3824.02	1738.95	>31600	13061	>10000	11760.3	>28165
SW48	135.243	4428.97	>10000	713.42	1292.19	58.8476	22.9747	21.3613	17769.2	5511.09	432.801	9.94567	4431.23	91.7864	68.2044	193.344	10158.7	0.317991	1024.11	18.3875	4	>10000	96.9976	6.20715
SW480	4489.34	>31600	>10000	1088.85	2442.93	342.167	155.782	>31600	15759.3	>31600	1035.58	3799.86	6035.28	4088.73	5819.67	17311	>31600	4546.66	2662.11	>31600	12828	>10000	13205	230.061
SW620	267.529	>31600	>10000	979.712	1555.15	92.7455	100.203	>31600	>31600	>31600	916.163	3138.11	4961.62	6364.21	179.325	941.747	26831.1	4144.32	1368.58	>31600	26894	>10000	20740.9	16.5468
SW626	4094.38	>31600	>10000	1296.63	3426.47	145.634	139.047	>31600	>31600	>31600	1644.18	3794.15	7076.81	3861.34	6361.13	398.483	>31600	3839.63	2953.35	>31600	12976	>10000	12903.5	58.8071
SW837	8956.28	>31600	>10000	663.433	2942.33	137.443	102.493	>31600	>31600	>31600	2735.5	3962.61	7245	4232.89	12585.6	>31600	>31600	4594.06	4012.91	>31600	18157	>10000	17314.5	98.3584
SW872	501.089	>31600	>10000	779.586	2778.98	45.5304	311.015	>31600	>31600	>31600	721.353	3728.92	4580.37	4640.44	6263.2	5839.72	>31600	4633.32	2228.68	>31600	14593	>10000	12982.3	23.1199
SW900	181.35	>31600	>10000	536.581	2339.03	295.003	65.0399	>31600	7997.97	>31600	718.545	2299.09	4276.85	4869.14	206.943	852.409	>31600	3425.85	2303.07	>31600	12947	>10000	21519.4	111.37
SW948	818.365	>31600	>10000	1440.66	2278.19	87.0233	60.3257	>31600	>31600	>31600	1037.9	3662.18	4264.65	4609.79	5234.82	22845.7	>31600	3469.57	2660.63	>31600	19387	>10000	14010.4	25.7855
SW982	80.5506	>31600	>10000	489.722	4150.49	1695.86	160.971	>31600	19453.6	>31600	175.59	1746.28	6181.3	5096.81	53.0018	133.1	>31600	2881.7	1454.42	>31600	19646	>10000	18495.8	928.53
T24	55.1609	>31600	8718.04	2552.75	4044.46	42.7731	99.0792	>31600	12187.3	10944.2	724.739	664.517	3709.08	2763.41	164.061	724.22	26531.8	2644.37	2934.04	5209.84	13497	>10000	16543.3	4.78538
T98G	201.976	>31600	>10000	1341.17	4704.07	3341.86	116.641	20631.5	6229.52	1206.65	682.432	3486.38	1573.62	8763.88	649.863	377.685	90.5325	4989.84	3743.21	5244.15	16353	>10000	22141.5	>28165
TCCSUP	4550.19	>31600	3699.91	1414.9	3818.42	483.048	30.6983	18089.1	>31600	28754.9	680.456	379.931	4176.21	4313.67	6289.78	>31600	28729.6	3654.21	3539.84	1954.66	11819	>10000	14000.8	1448.3
THP-1	12809	>31600	>10000	6382.81	4755.37	20.4652	18.1094	>31600	6982.72	>31600	5168.95	1149.06	11106	7195.07	267.187	15947.8	>31600	3228.32	4954.54	>31600	22842	>10000	19183.6	1.02337
TT	49.0865	>31600	8096.18	675.743	3833.63	224.637	1483.68	7123.71	>31600	163.061	755.689	4207.26	200.179	4149.72	10361.5	20630.6	484.291	4670.39	3731.75	>31600	13297	>10000	17479.4	209.151
U-118 MG	4854.17	>31600	3327.32	1875.39	3848.24	147.429	270.415	23333.6	>31600	28991.1	497.036	890.922	5962.96	4026.18	184.585	20144.1	>31600	2958.35	3973.19	8451.22	16565	>10000	20764.1	151.299
U-2 OS	307.502	>31600	3791.33	1235.57	3857.13	279.278	12.155	10089.3	26863.4	10885.2	1028.88	2034.25	1405.97	1290.83	6487.77	15821.5	21496.6	2282.85	3446.42	85.909	12833	>10000	14005.8	3.90243
U-87 MG	52.6826	>31600	3099.82	8526.27	4435.34	924.594	152.519	>31600	>31600	>31600	4332.8	3415.73	6280.5	3740.83	80.7296	780.613	>31600	4293.68	221.947	>31600	14949.1	>10000	17195.1	245.14
VA-ES-BJ	46.7484	9577.12	>10000	633.375	4249.3	4579.71	44.8776	24110.8	15589.4	>31600	349.269	777.771	4595.43	2218.02	63.5191	233.237	28357.8	2525.66	30.8945	7561.92	19092.8	>10000	20784.2	89.4442

## Sheet: TableS3b_raw_counts_study_cmpds
Uitdehaag et al. (2018) Supplementary Table S3b. Cell panel data of the 17 studied kinase inhibitors. Raw luminescence counts as determined by proliferation assays, for details see www.ntrc.nl. Data as used for fitting of dose-response curves.
Incubation time is in hours. Concentration is in nM. Cell_counts are the average luminiscence counts of the tested compound concentration in duplo. Cell_count_control are the average luminescence counts of the DMSO control in quadruplo. Cell_count_time0 are the average luminescence counts at timepoint 0 in quadruplo.
cell_line	compound	incubation_time	concentration	cell_counts	cell_count_ctrl	cell_count_time0
5637	abemaciclib	72	3.16	2653114	3148604	460517
5637	abemaciclib	72	10.01	2874300	3148604	460517
5637	abemaciclib	72	31.65	2777594	3148604	460517
5637	abemaciclib	72	100.07	3145180	3148604	460517
5637	abemaciclib	72	316.46	2297820	3148604	460517
5637	abemaciclib	72	1000.72	2040160	3148604	460517
5637	abemaciclib	72	3164.56	1032120	3148604	460517
5637	abemaciclib	72	10007.2	12780	3148604	460517
5637	abemaciclib	72	31645.6	30014	3148604	460517
769-P	abemaciclib	72	3.16	4651894	4025603	550737
769-P	abemaciclib	72	10.01	4077140	4025603	550737
769-P	abemaciclib	72	31.65	3645360	4025603	550737
769-P	abemaciclib	72	100.07	3367754	4025603	550737
769-P	abemaciclib	72	316.46	2490620	4025603	550737
769-P	abemaciclib	72	1000.72	1726567	4025603	550737
769-P	abemaciclib	72	3164.56	716927	4025603	550737
769-P	abemaciclib	72	10007.2	3413	4025603	550737
769-P	abemaciclib	72	31645.6	5207	4025603	550737
786-O	abemaciclib	72	3.16	6208907	6066747	556720
786-O	abemaciclib	72	10.01	5422180	6066747	556720
786-O	abemaciclib	72	31.65	6174067	6066747	556720
786-O	abemaciclib	72	100.07	5108487	6066747	556720
786-O	abemaciclib	72	316.46	4655434	6066747	556720
786-O	abemaciclib	72	1000.72	2837647	6066747	556720
786-O	abemaciclib	72	3164.56	507047	6066747	556720
786-O	abemaciclib	72	10007.2	6814	6066747	556720
786-O	abemaciclib	72	31645.6	10507	6066747	556720
A-172	abemaciclib	72	3.16	1756420	1827023	547207
A-172	abemaciclib	72	10.01	1808927	1827023	547207
A-172	abemaciclib	72	31.65	1691460	1827023	547207
A-172	abemaciclib	72	100.07	1640093	1827023	547207
A-172	abemaciclib	72	316.46	1579453	1827023	547207
A-172	abemaciclib	72	1000.72	1265027	1827023	547207
A-172	abemaciclib	72	3164.56	900520	1827023	547207
A-172	abemaciclib	72	10007.2	3100	1827023	547207
A-172	abemaciclib	72	31645.6	240	1827023	547207
A-204	abemaciclib	72	3.16	1010087	1111520	336637
A-204	abemaciclib	72	10.01	866674	1111520	336637
A-204	abemaciclib	72	31.65	823620	1111520	336637
A-204	abemaciclib	72	100.07	754974	1111520	336637
A-204	abemaciclib	72	316.46	636267	1111520	336637
A-204	abemaciclib	72	1000.72	472827	1111520	336637
A-204	abemaciclib	72	3164.56	3713	1111520	336637
A-204	abemaciclib	72	10007.2	447	1111520	336637
A-204	abemaciclib	72	31645.6	8080	1111520	336637
A-427	abemaciclib	72	3.16	1845067	1957207	247477
A-427	abemaciclib	72	10.01	1701627	1957207	247477
A-427	abemaciclib	72	31.65	1518067	1957207	247477
A-427	abemaciclib	72	100.07	1317867	1957207	247477
A-427	abemaciclib	72	316.46	943393	1957207	247477
A-427	abemaciclib	72	1000.72	948667	1957207	247477
A-427	abemaciclib	72	3164.56	705047	1957207	247477
A-427	abemaciclib	72	10007.2	2080	1957207	247477
A-427	abemaciclib	72	31645.6	160	1957207	247477
A-498	abemaciclib	72	3.16	4604787	5569513	693063
A-498	abemaciclib	72	10.01	5073693	5569513	693063
A-498	abemaciclib	72	31.65	4962354	5569513	693063
A-498	abemaciclib	72	100.07	4521607	5569513	693063
A-498	abemaciclib	72	316.46	3654807	5569513	693063
A-498	abemaciclib	72	1000.72	2569260	5569513	693063
A-498	abemaciclib	72	3164.56	851340	5569513	693063
A-498	abemaciclib	72	10007.2	3047	5569513	693063
A-498	abemaciclib	72	31645.6	307	5569513	693063
A-549	abemaciclib	72	3.16	6707120	6683097	814250
A-549	abemaciclib	72	10.01	6553094	6683097	814250
A-549	abemaciclib	72	31.65	5784200	6683097	814250
A-549	abemaciclib	72	100.07	5553613	6683097	814250
A-549	abemaciclib	72	316.46	4572780	6683097	814250
A-549	abemaciclib	72	1000.72	3910614	6683097	814250
A-549	abemaciclib	72	3164.56	3472060	6683097	814250
A-549	abemaciclib	72	10007.2	17634	6683097	814250
A-549	abemaciclib	72	31645.6	387	6683097	814250
A-704	abemaciclib	72	3.16	5010353	4991937	2314910
A-704	abemaciclib	72	10.01	5016487	4991937	2314910
A-704	abemaciclib	72	31.65	4756160	4991937	2314910
A-704	abemaciclib	72	100.07	4786047	4991937	2314910
A-704	abemaciclib	72	316.46	4224973	4991937	2314910
A-704	abemaciclib	72	1000.72	3474667	4991937	2314910
A-704	abemaciclib	72	3164.56	958793	4991937	2314910
A-704	abemaciclib	72	10007.2	23893	4991937	2314910
A-704	abemaciclib	72	31645.6	2580	4991937	2314910
A375	abemaciclib	72	3.16	4563853	4793630	561173
A375	abemaciclib	72	10.01	4844014	4793630	561173
A375	abemaciclib	72	31.65	4517420	4793630	561173
A375	abemaciclib	72	100.07	4132360	4793630	561173
A375	abemaciclib	72	316.46	3427120	4793630	561173
A375	abemaciclib	72	1000.72	3113654	4793630	561173
A375	abemaciclib	72	3164.56	2983247	4793630	561173
A375	abemaciclib	72	10007.2	20034	4793630	561173
A375	abemaciclib	72	31645.6	267	4793630	561173
A388	abemaciclib	72	3.16	1661800	1630804	465200
A388	abemaciclib	72	10.01	1644014	1630804	465200
A388	abemaciclib	72	31.65	1633374	1630804	465200
A388	abemaciclib	72	100.07	1554814	1630804	465200
A388	abemaciclib	72	316.46	1542547	1630804	465200
A388	abemaciclib	72	1000.72	1268533	1630804	465200
A388	abemaciclib	72	3164.56	1130840	1630804	465200
A388	abemaciclib	72	10007.2	7040	1630804	465200
A388	abemaciclib	72	31645.6	287	1630804	465200
ACHN	abemaciclib	72	3.16	8211160	7982547	1315757
ACHN	abemaciclib	72	10.01	8233000	7982547	1315757
ACHN	abemaciclib	72	31.65	7238980	7982547	1315757
ACHN	abemaciclib	72	100.07	6131187	7982547	1315757
ACHN	abemaciclib	72	316.46	4470080	7982547	1315757
ACHN	abemaciclib	72	1000.72	2762174	7982547	1315757
ACHN	abemaciclib	72	3164.56	2053540	7982547	1315757
ACHN	abemaciclib	72	10007.2	7014	7982547	1315757
ACHN	abemaciclib	72	31645.6	933	7982547	1315757
AN3 CA	abemaciclib	72	3.16	880040	820803	156774
AN3 CA	abemaciclib	72	10.01	769900	820803	156774
AN3 CA	abemaciclib	72	31.65	692580	820803	156774
AN3 CA	abemaciclib	72	100.07	687814	820803	156774
AN3 CA	abemaciclib	72	316.46	613520	820803	156774
AN3 CA	abemaciclib	72	1000.72	487134	820803	156774
AN3 CA	abemaciclib	72	3164.56	128413	820803	156774
AN3 CA	abemaciclib	72	10007.2	5714	820803	156774
AN3 CA	abemaciclib	72	31645.6	307	820803	156774
AsPC-1	abemaciclib	72	3.16	4465687	4203360	1043607
AsPC-1	abemaciclib	72	10.01	4222227	4203360	1043607
AsPC-1	abemaciclib	72	31.65	4164907	4203360	1043607
AsPC-1	abemaciclib	72	100.07	3851307	4203360	1043607
AsPC-1	abemaciclib	72	316.46	3489634	4203360	1043607
AsPC-1	abemaciclib	72	1000.72	3118860	4203360	1043607
AsPC-1	abemaciclib	72	3164.56	2551987	4203360	1043607
AsPC-1	abemaciclib	72	10007.2	57100	4203360	1043607
AsPC-1	abemaciclib	72	31645.6	11387	4203360	1043607
AU-565	abemaciclib	72	3.16	3394767	3314550	1314683
AU-565	abemaciclib	72	10.01	3297107	3314550	1314683
AU-565	abemaciclib	72	31.65	3589620	3314550	1314683
AU-565	abemaciclib	72	100.07	3287147	3314550	1314683
AU-565	abemaciclib	72	316.46	2823640	3314550	1314683
AU-565	abemaciclib	72	1000.72	2516214	3314550	1314683
AU-565	abemaciclib	72	3164.56	2199400	3314550	1314683
AU-565	abemaciclib	72	10007.2	23740	3314550	1314683
AU-565	abemaciclib	72	31645.6	22560	3314550	1314683
BL-70	abemaciclib	72	3.16	6984427	7096584	550510
BL-70	abemaciclib	72	9.99	7564087	7096584	550510
BL-70	abemaciclib	72	31.6	7214627	7096584	550510
BL-70	abemaciclib	72	99.93	6511567	7096584	550510
BL-70	abemaciclib	72	316	4332880	7096584	550510
BL-70	abemaciclib	72	999.28	2222627	7096584	550510
BL-70	abemaciclib	72	3160	1572987	7096584	550510
BL-70	abemaciclib	72	9992.8	16527	7096584	550510
BL-70	abemaciclib	72	31600	11267	7096584	550510
BT-20	abemaciclib	72	3.16	3856154	3687067	1558170
BT-20	abemaciclib	72	10.01	4021060	3687067	1558170
BT-20	abemaciclib	72	31.65	3859520	3687067	1558170
BT-20	abemaciclib	72	100.07	4082727	3687067	1558170
BT-20	abemaciclib	72	316.46	3942827	3687067	1558170
BT-20	abemaciclib	72	1000.72	3818580	3687067	1558170
BT-20	abemaciclib	72	3164.56	3668920	3687067	1558170
BT-20	abemaciclib	72	10007.2	3329713	3687067	1558170
BT-20	abemaciclib	72	31645.6	10340	3687067	1558170
BT-474	abemaciclib	72	3.16	2942673	2962783	1512537
BT-474	abemaciclib	72	9.99	2887874	2962783	1512537
BT-474	abemaciclib	72	31.6	2839087	2962783	1512537
BT-474	abemaciclib	72	99.93	2666574	2962783	1512537
BT-474	abemaciclib	72	316	2606407	2962783	1512537
BT-474	abemaciclib	72	999.28	2516827	2962783	1512537
BT-474	abemaciclib	72	3160	2291727	2962783	1512537
BT-474	abemaciclib	72	9992.8	1645347	2962783	1512537
BT-474	abemaciclib	72	31600	6847	2962783	1512537
BT-549	abemaciclib	72	3.16	2959480	3072983	534787
BT-549	abemaciclib	72	10.01	3369507	3072983	534787
BT-549	abemaciclib	72	31.65	2998807	3072983	534787
BT-549	abemaciclib	72	100.07	3356100	3072983	534787
BT-549	abemaciclib	72	316.46	3361234	3072983	534787
BT-549	abemaciclib	72	1000.72	2663540	3072983	534787
BT-549	abemaciclib	72	3164.56	2054807	3072983	534787
BT-549	abemaciclib	72	10007.2	7667	3072983	534787
BT-549	abemaciclib	72	31645.6	1134	3072983	534787
BxPC-3	abemaciclib	72	3.16	612440	709347	192990
BxPC-3	abemaciclib	72	10.01	861000	709347	192990
BxPC-3	abemaciclib	72	31.65	802867	709347	192990
BxPC-3	abemaciclib	72	100.07	946507	709347	192990
BxPC-3	abemaciclib	72	316.46	581607	709347	192990
BxPC-3	abemaciclib	72	1000.72	530580	709347	192990
BxPC-3	abemaciclib	72	3164.56	314600	709347	192990
BxPC-3	abemaciclib	72	10007.2	1527	709347	192990
BxPC-3	abemaciclib	72	31645.6	373	709347	192990
C-33 A	abemaciclib	72	3.16	4257914	4150890	656673
C-33 A	abemaciclib	72	10.01	4221380	4150890	656673
C-33 A	abemaciclib	72	31.65	4422273	4150890	656673
C-33 A	abemaciclib	72	100.07	3876353	4150890	656673
C-33 A	abemaciclib	72	316.46	2869627	4150890	656673
C-33 A	abemaciclib	72	1000.72	2388580	4150890	656673
C-33 A	abemaciclib	72	3164.56	1988580	4150890	656673
C-33 A	abemaciclib	72	10007.2	18174	4150890	656673
C-33 A	abemaciclib	72	31645.6	520	4150890	656673
CAL 27	abemaciclib	72	3.16	1946934	1716320	189563
CAL 27	abemaciclib	72	10.01	1897820	1716320	189563
CAL 27	abemaciclib	72	31.65	2073320	1716320	189563
CAL 27	abemaciclib	72	100.07	1647394	1716320	189563
CAL 27	abemaciclib	72	316.46	1656927	1716320	189563
CAL 27	abemaciclib	72	1000.72	1384000	1716320	189563
CAL 27	abemaciclib	72	3164.56	889187	1716320	189563
CAL 27	abemaciclib	72	10007.2	3527	1716320	189563
CAL 27	abemaciclib	72	31645.6	154	1716320	189563
CCF-STTG1	abemaciclib	72	3.16	1133080	1109823	394780
CCF-STTG1	abemaciclib	72	10.01	1127247	1109823	394780
CCF-STTG1	abemaciclib	72	31.65	1078107	1109823	394780
CCF-STTG1	abemaciclib	72	100.07	1201840	1109823	394780
CCF-STTG1	abemaciclib	72	316.46	1179840	1109823	394780
CCF-STTG1	abemaciclib	72	1000.72	1340254	1109823	394780
CCF-STTG1	abemaciclib	72	3164.56	1112294	1109823	394780
CCF-STTG1	abemaciclib	72	10007.2	8734	1109823	394780
CCF-STTG1	abemaciclib	72	31645.6	340	1109823	394780
CCRF-CEM	abemaciclib	72	3.16	5561100	5699320	998463
CCRF-CEM	abemaciclib	72	10.01	5430707	5699320	998463
CCRF-CEM	abemaciclib	72	31.65	5428954	5699320	998463
CCRF-CEM	abemaciclib	72	100.07	5399760	5699320	998463
CCRF-CEM	abemaciclib	72	316.46	4490687	5699320	998463
CCRF-CEM	abemaciclib	72	1000.72	2953267	5699320	998463
CCRF-CEM	abemaciclib	72	3164.56	1731487	5699320	998463
CCRF-CEM	abemaciclib	72	10007.2	5440	5699320	998463
CCRF-CEM	abemaciclib	72	31645.6	480	5699320	998463
COLO 205	abemaciclib	72	3.16	7675907	7881713	928697
COLO 205	abemaciclib	72	10.01	7976353	7881713	928697
COLO 205	abemaciclib	72	31.65	7896400	7881713	928697
COLO 205	abemaciclib	72	100.07	7258207	7881713	928697
COLO 205	abemaciclib	72	316.46	5578747	7881713	928697
COLO 205	abemaciclib	72	1000.72	3874820	7881713	928697
COLO 205	abemaciclib	72	3164.56	2671847	7881713	928697
COLO 205	abemaciclib	72	10007.2	8627	7881713	928697
COLO 205	abemaciclib	72	31645.6	360	7881713	928697
COLO 829	abemaciclib	72	3.16	2172620	2212057	692040
COLO 829	abemaciclib	72	10.01	2340707	2212057	692040
COLO 829	abemaciclib	72	31.65	2043807	2212057	692040
COLO 829	abemaciclib	72	100.07	1984833	2212057	692040
COLO 829	abemaciclib	72	316.46	2404940	2212057	692040
COLO 829	abemaciclib	72	1000.72	2081280	2212057	692040
COLO 829	abemaciclib	72	3164.56	2017707	2212057	692040
COLO 829	abemaciclib	72	10007.2	7660	2212057	692040
COLO 829	abemaciclib	72	31645.6	654	2212057	692040
Daoy	abemaciclib	72	3.16	7048987	7305430	1103710
Daoy	abemaciclib	72	10.01	6900754	7305430	1103710
Daoy	abemaciclib	72	31.65	6791680	7305430	1103710
Daoy	abemaciclib	72	100.07	6906287	7305430	1103710
Daoy	abemaciclib	72	316.46	7143214	7305430	1103710
Daoy	abemaciclib	72	1000.72	6561687	7305430	1103710
Daoy	abemaciclib	72	3164.56	7144267	7305430	1103710
Daoy	abemaciclib	72	10007.2	24394	7305430	1103710
Daoy	abemaciclib	72	31645.6	5747	7305430	1103710
DB	abemaciclib	72	3.16	3441094	3333457	499783
DB	abemaciclib	72	10.01	3469387	3333457	499783
DB	abemaciclib	72	31.65	3550654	3333457	499783
DB	abemaciclib	72	100.07	3532774	3333457	499783
DB	abemaciclib	72	316.46	3137934	3333457	499783
DB	abemaciclib	72	1000.72	2208773	3333457	499783
DB	abemaciclib	72	3164.56	901654	3333457	499783
DB	abemaciclib	72	10007.2	4067	3333457	499783
DB	abemaciclib	72	31645.6	607	3333457	499783
DLD-1	abemaciclib	72	3.16	13055360	13557023	1299917
DLD-1	abemaciclib	72	10.01	13520273	13557023	1299917
DLD-1	abemaciclib	72	31.65	13693993	13557023	1299917
DLD-1	abemaciclib	72	100.07	13372820	13557023	1299917
DLD-1	abemaciclib	72	316.46	12029714	13557023	1299917
DLD-1	abemaciclib	72	1000.72	10638107	13557023	1299917
DLD-1	abemaciclib	72	3164.56	8705127	13557023	1299917
DLD-1	abemaciclib	72	10007.2	3293340	13557023	1299917
DLD-1	abemaciclib	72	31645.6	27087	13557023	1299917
DOHH-2	abemaciclib	72	3.16	8999980	9079280	1688067
DOHH-2	abemaciclib	72	9.99	9092300	9079280	1688067
DOHH-2	abemaciclib	72	31.6	8186147	9079280	1688067
DOHH-2	abemaciclib	72	99.93	8295067	9079280	1688067
DOHH-2	abemaciclib	72	316	6478307	9079280	1688067
DOHH-2	abemaciclib	72	999.28	4072807	9079280	1688067
DOHH-2	abemaciclib	72	3160	2112434	9079280	1688067
DOHH-2	abemaciclib	72	9992.8	22167	9079280	1688067
DOHH-2	abemaciclib	72	31600	16733	9079280	1688067
DoTc2 4510	abemaciclib	72	3.16	957494	935383	264457
DoTc2 4510	abemaciclib	72	10.01	962314	935383	264457
DoTc2 4510	abemaciclib	72	31.65	870673	935383	264457
DoTc2 4510	abemaciclib	72	100.07	909774	935383	264457
DoTc2 4510	abemaciclib	72	316.46	791420	935383	264457
DoTc2 4510	abemaciclib	72	1000.72	589367	935383	264457
DoTc2 4510	abemaciclib	72	3164.56	11207	935383	264457
DoTc2 4510	abemaciclib	72	10007.2	933	935383	264457
DoTc2 4510	abemaciclib	72	31645.6	180	935383	264457
DU 145	abemaciclib	72	3.16	4213767	4256700	738080
DU 145	abemaciclib	72	10.01	4794913	4256700	738080
DU 145	abemaciclib	72	31.65	4389600	4256700	738080
DU 145	abemaciclib	72	100.07	4751380	4256700	738080
DU 145	abemaciclib	72	316.46	4318147	4256700	738080
DU 145	abemaciclib	72	1000.72	3488560	4256700	738080
DU 145	abemaciclib	72	3164.56	2714033	4256700	738080
DU 145	abemaciclib	72	10007.2	19874	4256700	738080
DU 145	abemaciclib	72	31645.6	16460	4256700	738080
DU4475	abemaciclib	72	3.16	7878133	8213467	2106253
DU4475	abemaciclib	72	10.01	8322180	8213467	2106253
DU4475	abemaciclib	72	31.65	8160920	8213467	2106253
DU4475	abemaciclib	72	100.07	7934520	8213467	2106253
DU4475	abemaciclib	72	316.46	7559907	8213467	2106253
DU4475	abemaciclib	72	1000.72	7122574	8213467	2106253
DU4475	abemaciclib	72	3164.56	7161920	8213467	2106253
DU4475	abemaciclib	72	10007.2	41993	8213467	2106253
DU4475	abemaciclib	72	31645.6	3533	8213467	2106253
ES-2	abemaciclib	72	3.16	2127774	2125730	120574
ES-2	abemaciclib	72	10.01	1582620	2125730	120574
ES-2	abemaciclib	72	31.65	1769380	2125730	120574
ES-2	abemaciclib	72	100.07	1533573	2125730	120574
ES-2	abemaciclib	72	316.46	1095894	2125730	120574
ES-2	abemaciclib	72	1000.72	651587	2125730	120574
ES-2	abemaciclib	72	3164.56	11880	2125730	120574
ES-2	abemaciclib	72	10007.2	540	2125730	120574
ES-2	abemaciclib	72	31645.6	4840	2125730	120574
FaDu	abemaciclib	72	3.16	2283693	2387843	401837
FaDu	abemaciclib	72	10.01	2198467	2387843	401837
FaDu	abemaciclib	72	31.65	2368067	2387843	401837
FaDu	abemaciclib	72	100.07	2134547	2387843	401837
FaDu	abemaciclib	72	316.46	1782367	2387843	401837
FaDu	abemaciclib	72	1000.72	1254254	2387843	401837
FaDu	abemaciclib	72	3164.56	976620	2387843	401837
FaDu	abemaciclib	72	10007.2	8907	2387843	401837
FaDu	abemaciclib	72	31645.6	14214	2387843	401837
G-361	abemaciclib	72	3.16	2429440	2244054	649383
G-361	abemaciclib	72	10.01	2543147	2244054	649383
G-361	abemaciclib	72	31.65	2220114	2244054	649383
G-361	abemaciclib	72	100.07	1941774	2244054	649383
G-361	abemaciclib	72	316.46	1609900	2244054	649383
G-361	abemaciclib	72	1000.72	1585767	2244054	649383
G-361	abemaciclib	72	3164.56	5674	2244054	649383
G-361	abemaciclib	72	10007.2	794	2244054	649383
G-361	abemaciclib	72	31645.6	8054	2244054	649383
HCT-15	abemaciclib	72	3.16	9894860	9035637	660900
HCT-15	abemaciclib	72	10.01	9873774	9035637	660900
HCT-15	abemaciclib	72	31.65	9534200	9035637	660900
HCT-15	abemaciclib	72	100.07	10440127	9035637	660900
HCT-15	abemaciclib	72	316.46	9156667	9035637	660900
HCT-15	abemaciclib	72	1000.72	7893040	9035637	660900
HCT-15	abemaciclib	72	3164.56	5425674	9035637	660900
HCT-15	abemaciclib	72	10007.2	29820	9035637	660900
HCT-15	abemaciclib	72	31645.6	8047	9035637	660900
HCT 116	abemaciclib	72	3.16	4248847	4126734	263197
HCT 116	abemaciclib	72	10.01	4595780	4126734	263197
HCT 116	abemaciclib	72	31.65	3461300	4126734	263197
HCT 116	abemaciclib	72	100.07	3683147	4126734	263197
HCT 116	abemaciclib	72	316.46	2004813	4126734	263197
HCT 116	abemaciclib	72	1000.72	1493400	4126734	263197
HCT 116	abemaciclib	72	3164.56	34440	4126734	263197
HCT 116	abemaciclib	72	10007.2	12614	4126734	263197
HCT 116	abemaciclib	72	31645.6	20280	4126734	263197
HL-60	abemaciclib	72	3.16	2307107	2445377	890187
HL-60	abemaciclib	72	10.01	2181860	2445377	890187
HL-60	abemaciclib	72	31.65	2034240	2445377	890187
HL-60	abemaciclib	72	100.07	1774020	2445377	890187
HL-60	abemaciclib	72	316.46	1395540	2445377	890187
HL-60	abemaciclib	72	1000.72	1241340	2445377	890187
HL-60	abemaciclib	72	3164.56	237827	2445377	890187
HL-60	abemaciclib	72	10007.2	1287	2445377	890187
HL-60	abemaciclib	72	31645.6	487	2445377	890187
Hs 578T	abemaciclib	72	3.16	2288073	2149800	729224
Hs 578T	abemaciclib	72	10.01	2253767	2149800	729224
Hs 578T	abemaciclib	72	31.65	2301487	2149800	729224
Hs 578T	abemaciclib	72	100.07	2217534	2149800	729224
Hs 578T	abemaciclib	72	316.46	2379980	2149800	729224
Hs 578T	abemaciclib	72	1000.72	2108727	2149800	729224
Hs 578T	abemaciclib	72	3164.56	1913214	2149800	729224
Hs 578T	abemaciclib	72	10007.2	10987	2149800	729224
Hs 578T	abemaciclib	72	31645.6	267	2149800	729224
Hs 746T	abemaciclib	72	3.16	2015200	2075463	427837
Hs 746T	abemaciclib	72	10.01	2122294	2075463	427837
Hs 746T	abemaciclib	72	31.65	1800774	2075463	427837
Hs 746T	abemaciclib	72	100.07	1858327	2075463	427837
Hs 746T	abemaciclib	72	316.46	1692274	2075463	427837
Hs 746T	abemaciclib	72	1000.72	1230367	2075463	427837
Hs 746T	abemaciclib	72	3164.56	723720	2075463	427837
Hs 746T	abemaciclib	72	10007.2	2740	2075463	427837
Hs 746T	abemaciclib	72	31645.6	494	2075463	427837
Hs 766T	abemaciclib	72	3.16	960800	980253	309183
Hs 766T	abemaciclib	72	10.01	1001647	980253	309183
Hs 766T	abemaciclib	72	31.65	996240	980253	309183
Hs 766T	abemaciclib	72	100.07	948327	980253	309183
Hs 766T	abemaciclib	72	316.46	770087	980253	309183
Hs 766T	abemaciclib	72	1000.72	669073	980253	309183
Hs 766T	abemaciclib	72	3164.56	201140	980253	309183
Hs 766T	abemaciclib	72	10007.2	12394	980253	309183
Hs 766T	abemaciclib	72	31645.6	12327	980253	309183
HT	abemaciclib	72	3.16	6272687	5920237	1148437
HT	abemaciclib	72	10.01	6488467	5920237	1148437
HT	abemaciclib	72	31.65	6581874	5920237	1148437
HT	abemaciclib	72	100.07	6619740	5920237	1148437
HT	abemaciclib	72	316.46	6680000	5920237	1148437
HT	abemaciclib	72	1000.72	6636207	5920237	1148437
HT	abemaciclib	72	3164.56	6349747	5920237	1148437
HT	abemaciclib	72	10007.2	25680	5920237	1148437
HT	abemaciclib	72	31645.6	18020	5920237	1148437
HT-1080	abemaciclib	72	3.16	3539747	3583900	125134
HT-1080	abemaciclib	72	10.01	3604414	3583900	125134
HT-1080	abemaciclib	72	31.65	2579667	3583900	125134
HT-1080	abemaciclib	72	100.07	2612740	3583900	125134
HT-1080	abemaciclib	72	316.46	1963553	3583900	125134
HT-1080	abemaciclib	72	1000.72	861627	3583900	125134
HT-1080	abemaciclib	72	3164.56	9534	3583900	125134
HT-1080	abemaciclib	72	10007.2	620	3583900	125134
HT-1080	abemaciclib	72	31645.6	22574	3583900	125134
HuTu 80	abemaciclib	72	3.16	5746327	5602237	484924
HuTu 80	abemaciclib	72	10.01	5603573	5602237	484924
HuTu 80	abemaciclib	72	31.65	5621927	5602237	484924
HuTu 80	abemaciclib	72	100.07	5205240	5602237	484924
HuTu 80	abemaciclib	72	316.46	4106347	5602237	484924
HuTu 80	abemaciclib	72	1000.72	3831513	5602237	484924
HuTu 80	abemaciclib	72	3164.56	2926747	5602237	484924
HuTu 80	abemaciclib	72	10007.2	9907	5602237	484924
HuTu 80	abemaciclib	72	31645.6	3034	5602237	484924
J82	abemaciclib	72	3.16	3681900	3329687	795207
J82	abemaciclib	72	10.01	3585060	3329687	795207
J82	abemaciclib	72	31.65	3602820	3329687	795207
J82	abemaciclib	72	100.07	3349074	3329687	795207
J82	abemaciclib	72	316.46	3756860	3329687	795207
J82	abemaciclib	72	1000.72	3272260	3329687	795207
J82	abemaciclib	72	3164.56	3138220	3329687	795207
J82	abemaciclib	72	10007.2	30234	3329687	795207
J82	abemaciclib	72	31645.6	10614	3329687	795207
JAR	abemaciclib	72	3.16	5159554	4901037	306500
JAR	abemaciclib	72	10.01	5348020	4901037	306500
JAR	abemaciclib	72	31.65	5015800	4901037	306500
JAR	abemaciclib	72	100.07	5758193	4901037	306500
JAR	abemaciclib	72	316.46	4747054	4901037	306500
JAR	abemaciclib	72	1000.72	1902314	4901037	306500
JAR	abemaciclib	72	3164.56	73340	4901037	306500
JAR	abemaciclib	72	10007.2	3380	4901037	306500
JAR	abemaciclib	72	31645.6	24360	4901037	306500
JM-1	abemaciclib	72	3.16	2317527	2237307	458297
JM-1	abemaciclib	72	9.99	2521493	2237307	458297
JM-1	abemaciclib	72	31.6	1932487	2237307	458297
JM-1	abemaciclib	72	99.93	1864247	2237307	458297
JM-1	abemaciclib	72	316	1431954	2237307	458297
JM-1	abemaciclib	72	999.28	1229260	2237307	458297
JM-1	abemaciclib	72	3160	837154	2237307	458297
JM-1	abemaciclib	72	9992.8	4640	2237307	458297
JM-1	abemaciclib	72	31600	2607	2237307	458297
Jurkat E6-1	abemaciclib	72	3.16	3070480	3011557	495967
Jurkat E6-1	abemaciclib	72	10.01	3204413	3011557	495967
Jurkat E6-1	abemaciclib	72	31.65	3014353	3011557	495967
Jurkat E6-1	abemaciclib	72	100.07	2859227	3011557	495967
Jurkat E6-1	abemaciclib	72	316.46	2138767	3011557	495967
Jurkat E6-1	abemaciclib	72	1000.72	886574	3011557	495967
Jurkat E6-1	abemaciclib	72	3164.56	238414	3011557	495967
Jurkat E6-1	abemaciclib	72	10007.2	1067	3011557	495967
Jurkat E6-1	abemaciclib	72	31645.6	6667	3011557	495967
K-562	abemaciclib	72	3.16	7762667	7200724	548540
K-562	abemaciclib	72	10.01	7688747	7200724	548540
K-562	abemaciclib	72	31.65	7548460	7200724	548540
K-562	abemaciclib	72	100.07	7122520	7200724	548540
K-562	abemaciclib	72	316.46	5231640	7200724	548540
K-562	abemaciclib	72	1000.72	5163827	7200724	548540
K-562	abemaciclib	72	3164.56	2427073	7200724	548540
K-562	abemaciclib	72	10007.2	9494	7200724	548540
K-562	abemaciclib	72	31645.6	340	7200724	548540
KATO III	abemaciclib	72	3.16	1885453	1927934	490727
KATO III	abemaciclib	72	10.01	1805694	1927934	490727
KATO III	abemaciclib	72	31.65	1720327	1927934	490727
KATO III	abemaciclib	72	100.07	1562614	1927934	490727
KATO III	abemaciclib	72	316.46	1051534	1927934	490727
KATO III	abemaciclib	72	1000.72	863420	1927934	490727
KATO III	abemaciclib	72	3164.56	257040	1927934	490727
KATO III	abemaciclib	72	10007.2	55567	1927934	490727
KATO III	abemaciclib	72	31645.6	520	1927934	490727
KG-1	abemaciclib	72	3.16	1856900	1875477	854033
KG-1	abemaciclib	72	10.01	1834827	1875477	854033
KG-1	abemaciclib	72	31.65	1655854	1875477	854033
KG-1	abemaciclib	72	100.07	1404114	1875477	854033
KG-1	abemaciclib	72	316.46	1270014	1875477	854033
KG-1	abemaciclib	72	1000.72	1225054	1875477	854033
KG-1	abemaciclib	72	3164.56	765107	1875477	854033
KG-1	abemaciclib	72	10007.2	2513	1875477	854033
KG-1	abemaciclib	72	31645.6	214	1875477	854033
KLE	abemaciclib	72	3.16	2745547	2910230	1586440
KLE	abemaciclib	72	10.01	3222794	2910230	1586440
KLE	abemaciclib	72	31.65	2817560	2910230	1586440
KLE	abemaciclib	72	100.07	2599747	2910230	1586440
KLE	abemaciclib	72	316.46	2412054	2910230	1586440
KLE	abemaciclib	72	1000.72	2125367	2910230	1586440
KLE	abemaciclib	72	3164.56	2050053	2910230	1586440
KLE	abemaciclib	72	10007.2	161720	2910230	1586440
KLE	abemaciclib	72	31645.6	913	2910230	1586440
KU812	abemaciclib	72	3.16	2066134	2263067	742937
KU812	abemaciclib	72	10.01	2298273	2263067	742937
KU812	abemaciclib	72	31.65	2206613	2263067	742937
KU812	abemaciclib	72	100.07	1954107	2263067	742937
KU812	abemaciclib	72	316.46	1546200	2263067	742937
KU812	abemaciclib	72	1000.72	1314700	2263067	742937
KU812	abemaciclib	72	3164.56	1161673	2263067	742937
KU812	abemaciclib	72	10007.2	7007	2263067	742937
KU812	abemaciclib	72	31645.6	9847	2263067	742937
LNCaP FGC	abemaciclib	72	3.16	3399840	3430930	1191430
LNCaP FGC	abemaciclib	72	10.01	3205640	3430930	1191430
LNCaP FGC	abemaciclib	72	31.65	2860260	3430930	1191430
LNCaP FGC	abemaciclib	72	100.07	2745347	3430930	1191430
LNCaP FGC	abemaciclib	72	316.46	2457040	3430930	1191430
LNCaP FGC	abemaciclib	72	1000.72	2624467	3430930	1191430
LNCaP FGC	abemaciclib	72	3164.56	2288634	3430930	1191430
LNCaP FGC	abemaciclib	72	10007.2	1115787	3430930	1191430
LNCaP FGC	abemaciclib	72	31645.6	3800	3430930	1191430
LoVo	abemaciclib	72	3.16	2580974	2628067	358793
LoVo	abemaciclib	72	10.01	2659480	2628067	358793
LoVo	abemaciclib	72	31.65	2095434	2628067	358793
LoVo	abemaciclib	72	100.07	1945460	2628067	358793
LoVo	abemaciclib	72	316.46	1302587	2628067	358793
LoVo	abemaciclib	72	1000.72	899120	2628067	358793
LoVo	abemaciclib	72	3164.56	459634	2628067	358793
LoVo	abemaciclib	72	10007.2	221533	2628067	358793
LoVo	abemaciclib	72	31645.6	1307	2628067	358793
LS 174T	abemaciclib	72	3.16	866813	814494	112307
LS 174T	abemaciclib	72	10.01	746634	814494	112307
LS 174T	abemaciclib	72	31.65	697954	814494	112307
LS 174T	abemaciclib	72	100.07	688587	814494	112307
LS 174T	abemaciclib	72	316.46	358807	814494	112307
LS 174T	abemaciclib	72	1000.72	211867	814494	112307
LS 174T	abemaciclib	72	3164.56	95693	814494	112307
LS 174T	abemaciclib	72	10007.2	747	814494	112307
LS 174T	abemaciclib	72	31645.6	11940	814494	112307
LS411N	abemaciclib	72	3.16	6103187	6288754	887130
LS411N	abemaciclib	72	10.01	5988287	6288754	887130
LS411N	abemaciclib	72	31.65	5811214	6288754	887130
LS411N	abemaciclib	72	100.07	5117920	6288754	887130
LS411N	abemaciclib	72	316.46	4183140	6288754	887130
LS411N	abemaciclib	72	1000.72	2860613	6288754	887130
LS411N	abemaciclib	72	3164.56	1884860	6288754	887130
LS411N	abemaciclib	72	10007.2	29267	6288754	887130
LS411N	abemaciclib	72	31645.6	974	6288754	887130
MCF7	abemaciclib	72	3.16	6383527	6530007	3211607
MCF7	abemaciclib	72	10.01	5956413	6530007	3211607
MCF7	abemaciclib	72	31.65	5964414	6530007	3211607
MCF7	abemaciclib	72	100.07	5806287	6530007	3211607
MCF7	abemaciclib	72	316.46	5425274	6530007	3211607
MCF7	abemaciclib	72	1000.72	5511220	6530007	3211607
MCF7	abemaciclib	72	3164.56	5711793	6530007	3211607
MCF7	abemaciclib	72	10007.2	5251253	6530007	3211607
MCF7	abemaciclib	72	31645.6	15794	6530007	3211607
MDA-MB-231	abemaciclib	72	3.16	2023800	2020297	137453
MDA-MB-231	abemaciclib	72	9.99	2084973	2020297	137453
MDA-MB-231	abemaciclib	72	31.6	1941987	2020297	137453
MDA-MB-231	abemaciclib	72	99.93	1864907	2020297	137453
MDA-MB-231	abemaciclib	72	316	1713247	2020297	137453
MDA-MB-231	abemaciclib	72	999.28	1315293	2020297	137453
MDA-MB-231	abemaciclib	72	3160	1126673	2020297	137453
MDA-MB-231	abemaciclib	72	9992.8	14393	2020297	137453
MDA-MB-231	abemaciclib	72	31600	3653	2020297	137453
MeWo	abemaciclib	72	3.16	2816354	2946170	784000
MeWo	abemaciclib	72	10.01	2828894	2946170	784000
MeWo	abemaciclib	72	31.65	2788587	2946170	784000
MeWo	abemaciclib	72	100.07	2437114	2946170	784000
MeWo	abemaciclib	72	316.46	2264007	2946170	784000
MeWo	abemaciclib	72	1000.72	2270873	2946170	784000
MeWo	abemaciclib	72	3164.56	2266040	2946170	784000
MeWo	abemaciclib	72	10007.2	804314	2946170	784000
MeWo	abemaciclib	72	31645.6	2914	2946170	784000
MG-63	abemaciclib	72	3.16	9562454	9630397	1496097
MG-63	abemaciclib	72	10.01	9026673	9630397	1496097
MG-63	abemaciclib	72	31.65	8545127	9630397	1496097
MG-63	abemaciclib	72	100.07	7452387	9630397	1496097
MG-63	abemaciclib	72	316.46	6998720	9630397	1496097
MG-63	abemaciclib	72	1000.72	6121940	9630397	1496097
MG-63	abemaciclib	72	3164.56	5862953	9630397	1496097
MG-63	abemaciclib	72	10007.2	20500	9630397	1496097
MG-63	abemaciclib	72	31645.6	1767	9630397	1496097
MIA PaCa-2	abemaciclib	72	3.16	10536374	9650240	1482450
MIA PaCa-2	abemaciclib	72	10.01	9592560	9650240	1482450
MIA PaCa-2	abemaciclib	72	31.65	9124593	9650240	1482450
MIA PaCa-2	abemaciclib	72	100.07	8574773	9650240	1482450
MIA PaCa-2	abemaciclib	72	316.46	8503760	9650240	1482450
MIA PaCa-2	abemaciclib	72	1000.72	6915214	9650240	1482450
MIA PaCa-2	abemaciclib	72	3164.56	6365627	9650240	1482450
MIA PaCa-2	abemaciclib	72	10007.2	18467	9650240	1482450
MIA PaCa-2	abemaciclib	72	31645.6	5120	9650240	1482450
MOLT-4	abemaciclib	72	3.16	5266507	5170287	627493
MOLT-4	abemaciclib	72	10.01	5111640	5170287	627493
MOLT-4	abemaciclib	72	31.65	5163960	5170287	627493
MOLT-4	abemaciclib	72	100.07	4598713	5170287	627493
MOLT-4	abemaciclib	72	316.46	4023647	5170287	627493
MOLT-4	abemaciclib	72	1000.72	2138407	5170287	627493
MOLT-4	abemaciclib	72	3164.56	1214220	5170287	627493
MOLT-4	abemaciclib	72	10007.2	3700	5170287	627493
MOLT-4	abemaciclib	72	31645.6	233	5170287	627493
NCCIT	abemaciclib	72	3.16	3577607	3209324	310887
NCCIT	abemaciclib	72	10.01	3614154	3209324	310887
NCCIT	abemaciclib	72	31.65	3671073	3209324	310887
NCCIT	abemaciclib	72	100.07	2811127	3209324	310887
NCCIT	abemaciclib	72	316.46	1946127	3209324	310887
NCCIT	abemaciclib	72	1000.72	1056187	3209324	310887
NCCIT	abemaciclib	72	3164.56	298074	3209324	310887
NCCIT	abemaciclib	72	10007.2	1340	3209324	310887
NCCIT	abemaciclib	72	31645.6	307	3209324	310887
NCI-H460	abemaciclib	72	3.16	12579953	12775773	614370
NCI-H460	abemaciclib	72	10.01	13114467	12775773	614370
NCI-H460	abemaciclib	72	31.65	12069207	12775773	614370
NCI-H460	abemaciclib	72	100.07	10802487	12775773	614370
NCI-H460	abemaciclib	72	316.46	9207120	12775773	614370
NCI-H460	abemaciclib	72	1000.72	7444894	12775773	614370
NCI-H460	abemaciclib	72	3164.56	6199620	12775773	614370
NCI-H460	abemaciclib	72	10007.2	18040	12775773	614370
NCI-H460	abemaciclib	72	31645.6	374	12775773	614370
NCI-H661	abemaciclib	72	0.1	1574694	1591947	683650
NCI-H661	abemaciclib	72	0.32	1625427	1591947	683650
NCI-H661	abemaciclib	72	1	1638500	1591947	683650
NCI-H661	abemaciclib	72	3.16	1626654	1591947	683650
NCI-H661	abemaciclib	72	10	1494260	1591947	683650
NCI-H661	abemaciclib	72	31.62	1847527	1591947	683650
NCI-H661	abemaciclib	72	100	1519773	1591947	683650
NCI-H661	abemaciclib	72	316.23	1295080	1591947	683650
NCI-H661	abemaciclib	72	1000	1324420	1591947	683650
NCI-H82	abemaciclib	72	3.16	8157580	7614570	566610
NCI-H82	abemaciclib	72	10.01	7688167	7614570	566610
NCI-H82	abemaciclib	72	31.65	6768934	7614570	566610
NCI-H82	abemaciclib	72	100.07	6898813	7614570	566610
NCI-H82	abemaciclib	72	316.46	7266367	7614570	566610
NCI-H82	abemaciclib	72	1000.72	5829500	7614570	566610
NCI-H82	abemaciclib	72	3164.56	4930320	7614570	566610
NCI-H82	abemaciclib	72	10007.2	14467	7614570	566610
NCI-H82	abemaciclib	72	31645.6	694	7614570	566610
OVCAR-3	abemaciclib	72	3.16	7568980	7012114	3582083
OVCAR-3	abemaciclib	72	10.01	8243500	7012114	3582083
OVCAR-3	abemaciclib	72	31.65	7803820	7012114	3582083
OVCAR-3	abemaciclib	72	100.07	7948067	7012114	3582083
OVCAR-3	abemaciclib	72	316.46	6765907	7012114	3582083
OVCAR-3	abemaciclib	72	1000.72	6602600	7012114	3582083
OVCAR-3	abemaciclib	72	3164.56	5826400	7012114	3582083
OVCAR-3	abemaciclib	72	10007.2	4940707	7012114	3582083
OVCAR-3	abemaciclib	72	31645.6	33300	7012114	3582083
PA-1	abemaciclib	72	3.16	1369594	1249797	212247
PA-1	abemaciclib	72	10.01	1357200	1249797	212247
PA-1	abemaciclib	72	31.65	1235420	1249797	212247
PA-1	abemaciclib	72	100.07	1096467	1249797	212247
PA-1	abemaciclib	72	316.46	987120	1249797	212247
PA-1	abemaciclib	72	1000.72	528420	1249797	212247
PA-1	abemaciclib	72	3164.56	46507	1249797	212247
PA-1	abemaciclib	72	10007.2	587	1249797	212247
PA-1	abemaciclib	72	31645.6	227	1249797	212247
PC-3	abemaciclib	72	3.16	8279054	7831677	1498357
PC-3	abemaciclib	72	10.01	8440194	7831677	1498357
PC-3	abemaciclib	72	31.65	7648047	7831677	1498357
PC-3	abemaciclib	72	100.07	8514434	7831677	1498357
PC-3	abemaciclib	72	316.46	7448927	7831677	1498357
PC-3	abemaciclib	72	1000.72	6123867	7831677	1498357
PC-3	abemaciclib	72	3164.56	4288120	7831677	1498357
PC-3	abemaciclib	72	10007.2	2573000	7831677	1498357
PC-3	abemaciclib	72	31645.6	14994	7831677	1498357
PFSK-1	abemaciclib	72	3.16	3797567	4006807	643620
PFSK-1	abemaciclib	72	10.01	3910267	4006807	643620
PFSK-1	abemaciclib	72	31.65	3775700	4006807	643620
PFSK-1	abemaciclib	72	100.07	3749074	4006807	643620
PFSK-1	abemaciclib	72	316.46	3485360	4006807	643620
PFSK-1	abemaciclib	72	1000.72	3753587	4006807	643620
PFSK-1	abemaciclib	72	3164.56	2845487	4006807	643620
PFSK-1	abemaciclib	72	10007.2	16327	4006807	643620
PFSK-1	abemaciclib	72	31645.6	18427	4006807	643620
RD	abemaciclib	72	3.16	2123880	2098703	317257
RD	abemaciclib	72	10.01	2103980	2098703	317257
RD	abemaciclib	72	31.65	1844194	2098703	317257
RD	abemaciclib	72	100.07	1759060	2098703	317257
RD	abemaciclib	72	316.46	1673200	2098703	317257
RD	abemaciclib	72	1000.72	1750407	2098703	317257
RD	abemaciclib	72	3164.56	637240	2098703	317257
RD	abemaciclib	72	10007.2	2360	2098703	317257
RD	abemaciclib	72	31645.6	4367	2098703	317257
RKO	abemaciclib	72	3.16	3791940	3350147	244837
RKO	abemaciclib	72	10.01	3782407	3350147	244837
RKO	abemaciclib	72	31.65	3106867	3350147	244837
RKO	abemaciclib	72	100.07	3077553	3350147	244837
RKO	abemaciclib	72	316.46	2726433	3350147	244837
RKO	abemaciclib	72	1000.72	2214480	3350147	244837
RKO	abemaciclib	72	3164.56	1845347	3350147	244837
RKO	abemaciclib	72	10007.2	6000	3350147	244837
RKO	abemaciclib	72	31645.6	307	3350147	244837
RL	abemaciclib	72	3.16	14016374	11696797	919977
RL	abemaciclib	72	10.01	13332414	11696797	919977
RL	abemaciclib	72	31.65	12178567	11696797	919977
RL	abemaciclib	72	100.07	11809014	11696797	919977
RL	abemaciclib	72	316.46	8873753	11696797	919977
RL	abemaciclib	72	1000.72	6675874	11696797	919977
RL	abemaciclib	72	3164.56	3290340	11696797	919977
RL	abemaciclib	72	10007.2	10647	11696797	919977
RL	abemaciclib	72	31645.6	15533	11696797	919977
RL95-2	abemaciclib	72	3.16	2110620	1920093	760677
RL95-2	abemaciclib	72	10.01	1960360	1920093	760677
RL95-2	abemaciclib	72	31.65	1971694	1920093	760677
RL95-2	abemaciclib	72	100.07	1972820	1920093	760677
RL95-2	abemaciclib	72	316.46	1746900	1920093	760677
RL95-2	abemaciclib	72	1000.72	1451874	1920093	760677
RL95-2	abemaciclib	72	3164.56	7240	1920093	760677
RL95-2	abemaciclib	72	10007.2	767	1920093	760677
RL95-2	abemaciclib	72	31645.6	240	1920093	760677
RPMI-7951	abemaciclib	72	3.16	2900440	2851180	386800
RPMI-7951	abemaciclib	72	10.01	2329587	2851180	386800
RPMI-7951	abemaciclib	72	31.65	2795447	2851180	386800
RPMI-7951	abemaciclib	72	100.07	2388880	2851180	386800
RPMI-7951	abemaciclib	72	316.46	2083720	2851180	386800
RPMI-7951	abemaciclib	72	1000.72	1565060	2851180	386800
RPMI-7951	abemaciclib	72	3164.56	1146260	2851180	386800
RPMI-7951	abemaciclib	72	10007.2	3840	2851180	386800
RPMI-7951	abemaciclib	72	31645.6	240	2851180	386800
RS4-11	abemaciclib	72	3.16	3000474	2782057	673067
RS4-11	abemaciclib	72	10.01	2767840	2782057	673067
RS4-11	abemaciclib	72	31.65	2692827	2782057	673067
RS4-11	abemaciclib	72	100.07	2784540	2782057	673067
RS4-11	abemaciclib	72	316.46	1808520	2782057	673067
RS4-11	abemaciclib	72	1000.72	1166607	2782057	673067
RS4-11	abemaciclib	72	3164.56	569407	2782057	673067
RS4-11	abemaciclib	72	10007.2	2407	2782057	673067
RS4-11	abemaciclib	72	31645.6	10240	2782057	673067
RT4	abemaciclib	72	3.16	6054774	6604597	2364223
RT4	abemaciclib	72	10.01	5340014	6604597	2364223
RT4	abemaciclib	72	31.65	4771720	6604597	2364223
RT4	abemaciclib	72	100.07	4348974	6604597	2364223
RT4	abemaciclib	72	316.46	4354214	6604597	2364223
RT4	abemaciclib	72	1000.72	4240734	6604597	2364223
RT4	abemaciclib	72	3164.56	4094327	6604597	2364223
RT4	abemaciclib	72	10007.2	18313	6604597	2364223
RT4	abemaciclib	72	31645.6	6714	6604597	2364223
SHP-77	abemaciclib	72	3.16	2467767	2551413	579050
SHP-77	abemaciclib	72	10.01	2836887	2551413	579050
SHP-77	abemaciclib	72	31.65	2707940	2551413	579050
SHP-77	abemaciclib	72	100.07	2832474	2551413	579050
SHP-77	abemaciclib	72	316.46	2433354	2551413	579050
SHP-77	abemaciclib	72	1000.72	2604900	2551413	579050
SHP-77	abemaciclib	72	3164.56	1763247	2551413	579050
SHP-77	abemaciclib	72	10007.2	6220	2551413	579050
SHP-77	abemaciclib	72	31645.6	38880	2551413	579050
SJCRH30	abemaciclib	72	3.16	4426954	4150297	669637
SJCRH30	abemaciclib	72	10.01	4181313	4150297	669637
SJCRH30	abemaciclib	72	31.65	3802180	4150297	669637
SJCRH30	abemaciclib	72	100.07	3594000	4150297	669637
SJCRH30	abemaciclib	72	316.46	3165887	4150297	669637
SJCRH30	abemaciclib	72	1000.72	3737287	4150297	669637
SJCRH30	abemaciclib	72	3164.56	3129600	4150297	669637
SJCRH30	abemaciclib	72	10007.2	18907	4150297	669637
SJCRH30	abemaciclib	72	31645.6	4187	4150297	669637
SK-N-AS	abemaciclib	72	3.16	1892474	1929420	512447
SK-N-AS	abemaciclib	72	10.01	1658207	1929420	512447
SK-N-AS	abemaciclib	72	31.65	1616400	1929420	512447
SK-N-AS	abemaciclib	72	100.07	1398233	1929420	512447
SK-N-AS	abemaciclib	72	316.46	1378194	1929420	512447
SK-N-AS	abemaciclib	72	1000.72	1234907	1929420	512447
SK-N-AS	abemaciclib	72	3164.56	1047087	1929420	512447
SK-N-AS	abemaciclib	72	10007.2	6340	1929420	512447
SK-N-AS	abemaciclib	72	31645.6	4553	1929420	512447
SK-N-FI	abemaciclib	72	3.16	1391960	1405287	492137
SK-N-FI	abemaciclib	72	10.01	1337534	1405287	492137
SK-N-FI	abemaciclib	72	31.65	1187460	1405287	492137
SK-N-FI	abemaciclib	72	100.07	1065727	1405287	492137
SK-N-FI	abemaciclib	72	316.46	950720	1405287	492137
SK-N-FI	abemaciclib	72	1000.72	956914	1405287	492137
SK-N-FI	abemaciclib	72	3164.56	820047	1405287	492137
SK-N-FI	abemaciclib	72	10007.2	2687	1405287	492137
SK-N-FI	abemaciclib	72	31645.6	2974	1405287	492137
SNU-5	abemaciclib	72	3.16	3439620	3336647	1133233
SNU-5	abemaciclib	72	10.01	3151760	3336647	1133233
SNU-5	abemaciclib	72	31.65	2967754	3336647	1133233
SNU-5	abemaciclib	72	100.07	3000894	3336647	1133233
SNU-5	abemaciclib	72	316.46	2559987	3336647	1133233
SNU-5	abemaciclib	72	1000.72	2511020	3336647	1133233
SNU-5	abemaciclib	72	3164.56	2090747	3336647	1133233
SNU-5	abemaciclib	72	10007.2	6307	3336647	1133233
SNU-5	abemaciclib	72	31645.6	493	3336647	1133233
SNU-C2B	abemaciclib	72	3.16	905980	851767	368007
SNU-C2B	abemaciclib	72	10.01	944154	851767	368007
SNU-C2B	abemaciclib	72	31.65	856694	851767	368007
SNU-C2B	abemaciclib	72	100.07	864980	851767	368007
SNU-C2B	abemaciclib	72	316.46	738040	851767	368007
SNU-C2B	abemaciclib	72	1000.72	580707	851767	368007
SNU-C2B	abemaciclib	72	3164.56	471447	851767	368007
SNU-C2B	abemaciclib	72	10007.2	6033	851767	368007
SNU-C2B	abemaciclib	72	31645.6	19900	851767	368007
SR	abemaciclib	72	3.16	2441374	2527363	481104
SR	abemaciclib	72	10.01	2601180	2527363	481104
SR	abemaciclib	72	31.65	2097660	2527363	481104
SR	abemaciclib	72	100.07	2066467	2527363	481104
SR	abemaciclib	72	316.46	1190054	2527363	481104
SR	abemaciclib	72	1000.72	399467	2527363	481104
SR	abemaciclib	72	3164.56	98627	2527363	481104
SR	abemaciclib	72	10007.2	900	2527363	481104
SR	abemaciclib	72	31645.6	313	2527363	481104
SU-DHL-1	abemaciclib	72	3.16	9310294	10134537	562027
SU-DHL-1	abemaciclib	72	10.01	9763667	10134537	562027
SU-DHL-1	abemaciclib	72	31.65	8907767	10134537	562027
SU-DHL-1	abemaciclib	72	100.07	9888527	10134537	562027
SU-DHL-1	abemaciclib	72	316.46	8287280	10134537	562027
SU-DHL-1	abemaciclib	72	1000.72	5930867	10134537	562027
SU-DHL-1	abemaciclib	72	3164.56	3642507	10134537	562027
SU-DHL-1	abemaciclib	72	10007.2	12253	10134537	562027
SU-DHL-1	abemaciclib	72	31645.6	287	10134537	562027
SU-DHL-5	abemaciclib	72	3.16	10467120	10372460	836930
SU-DHL-5	abemaciclib	72	9.99	10684660	10372460	836930
SU-DHL-5	abemaciclib	72	31.6	10081560	10372460	836930
SU-DHL-5	abemaciclib	72	99.93	10352214	10372460	836930
SU-DHL-5	abemaciclib	72	316	9578054	10372460	836930
SU-DHL-5	abemaciclib	72	999.28	7321794	10372460	836930
SU-DHL-5	abemaciclib	72	3160	2949334	10372460	836930
SU-DHL-5	abemaciclib	72	9992.8	22600	10372460	836930
SU-DHL-5	abemaciclib	72	31600	14853	10372460	836930
SU-DHL-6	abemaciclib	72	3.16	5392267	5500560	832597
SU-DHL-6	abemaciclib	72	10.01	5231953	5500560	832597
SU-DHL-6	abemaciclib	72	31.65	4765527	5500560	832597
SU-DHL-6	abemaciclib	72	100.07	4422193	5500560	832597
SU-DHL-6	abemaciclib	72	316.46	2596760	5500560	832597
SU-DHL-6	abemaciclib	72	1000.72	1443880	5500560	832597
SU-DHL-6	abemaciclib	72	3164.56	953900	5500560	832597
SU-DHL-6	abemaciclib	72	10007.2	4107	5500560	832597
SU-DHL-6	abemaciclib	72	31645.6	707	5500560	832597
SUP-T1	abemaciclib	72	3.16	3186153	2992230	424510
SUP-T1	abemaciclib	72	10.01	3218160	2992230	424510
SUP-T1	abemaciclib	72	31.65	2853513	2992230	424510
SUP-T1	abemaciclib	72	100.07	2837274	2992230	424510
SUP-T1	abemaciclib	72	316.46	2119947	2992230	424510
SUP-T1	abemaciclib	72	1000.72	1407553	2992230	424510
SUP-T1	abemaciclib	72	3164.56	1126547	2992230	424510
SUP-T1	abemaciclib	72	10007.2	76867	2992230	424510
SUP-T1	abemaciclib	72	31645.6	454	2992230	424510
SW48	abemaciclib	72	3.16	6053967	5900100	1296800
SW48	abemaciclib	72	10.01	5742294	5900100	1296800
SW48	abemaciclib	72	31.65	5472640	5900100	1296800
SW48	abemaciclib	72	100.07	4143227	5900100	1296800
SW48	abemaciclib	72	316.46	2918927	5900100	1296800
SW48	abemaciclib	72	1000.72	1856140	5900100	1296800
SW48	abemaciclib	72	3164.56	1806574	5900100	1296800
SW48	abemaciclib	72	10007.2	299540	5900100	1296800
SW48	abemaciclib	72	31645.6	3527	5900100	1296800
SW480	abemaciclib	72	3.16	4836974	5200440	724417
SW480	abemaciclib	72	10	5419334	5200440	724417
SW480	abemaciclib	72	31.62	5653434	5200440	724417
SW480	abemaciclib	72	100	5235813	5200440	724417
SW480	abemaciclib	72	316.23	5273767	5200440	724417
SW480	abemaciclib	72	1000	4439393	5200440	724417
SW480	abemaciclib	72	3162.28	4376380	5200440	724417
SW480	abemaciclib	72	10000	73880	5200440	724417
SW480	abemaciclib	72	31622.8	827	5200440	724417
SW620	abemaciclib	72	3.16	8451447	8760010	826227
SW620	abemaciclib	72	10.01	8651980	8760010	826227
SW620	abemaciclib	72	31.65	8078780	8760010	826227
SW620	abemaciclib	72	100.07	7877413	8760010	826227
SW620	abemaciclib	72	316.46	5996660	8760010	826227
SW620	abemaciclib	72	1000.72	4607234	8760010	826227
SW620	abemaciclib	72	3164.56	4256300	8760010	826227
SW620	abemaciclib	72	10007.2	72847	8760010	826227
SW620	abemaciclib	72	31645.6	1354	8760010	826227
SW626	abemaciclib	72	3.16	2779487	3053854	879204
SW626	abemaciclib	72	10.01	3043920	3053854	879204
SW626	abemaciclib	72	31.65	2784307	3053854	879204
SW626	abemaciclib	72	100.07	2861740	3053854	879204
SW626	abemaciclib	72	316.46	2173987	3053854	879204
SW626	abemaciclib	72	1000.72	2600934	3053854	879204
SW626	abemaciclib	72	3164.56	1998753	3053854	879204
SW626	abemaciclib	72	10007.2	59874	3053854	879204
SW626	abemaciclib	72	31645.6	9827	3053854	879204
SW837	abemaciclib	72	3.16	3374934	3112307	839200
SW837	abemaciclib	72	10.01	3348947	3112307	839200
SW837	abemaciclib	72	31.65	3378394	3112307	839200
SW837	abemaciclib	72	100.07	3250667	3112307	839200
SW837	abemaciclib	72	316.46	2983453	3112307	839200
SW837	abemaciclib	72	1000.72	2814020	3112307	839200
SW837	abemaciclib	72	3164.56	2968527	3112307	839200
SW837	abemaciclib	72	10007.2	1399234	3112307	839200
SW837	abemaciclib	72	31645.6	38100	3112307	839200
SW872	abemaciclib	72	3.16	6818374	6617167	980260
SW872	abemaciclib	72	10.01	6946307	6617167	980260
SW872	abemaciclib	72	31.65	7009740	6617167	980260
SW872	abemaciclib	72	100.07	6812800	6617167	980260
SW872	abemaciclib	72	316.46	6464147	6617167	980260
SW872	abemaciclib	72	1000.72	5194800	6617167	980260
SW872	abemaciclib	72	3164.56	4949234	6617167	980260
SW872	abemaciclib	72	10007.2	31247	6617167	980260
SW872	abemaciclib	72	31645.6	18554	6617167	980260
SW900	abemaciclib	72	3.16	6152774	6172884	973327
SW900	abemaciclib	72	10.01	6401814	6172884	973327
SW900	abemaciclib	72	31.65	6335080	6172884	973327
SW900	abemaciclib	72	100.07	5211800	6172884	973327
SW900	abemaciclib	72	316.46	3534040	6172884	973327
SW900	abemaciclib	72	1000.72	2524100	6172884	973327
SW900	abemaciclib	72	3164.56	2425767	6172884	973327
SW900	abemaciclib	72	10007.2	9674	6172884	973327
SW900	abemaciclib	72	31645.6	10247	6172884	973327
SW948	abemaciclib	72	3.16	2910147	2756257	567570
SW948	abemaciclib	72	10.01	2997934	2756257	567570
SW948	abemaciclib	72	31.65	3066494	2756257	567570
SW948	abemaciclib	72	100.07	3273120	2756257	567570
SW948	abemaciclib	72	316.46	2763147	2756257	567570
SW948	abemaciclib	72	1000.72	2382780	2756257	567570
SW948	abemaciclib	72	3164.56	1948933	2756257	567570
SW948	abemaciclib	72	10007.2	10787	2756257	567570
SW948	abemaciclib	72	31645.6	19180	2756257	567570
SW982	abemaciclib	72	3.16	4251640	4304273	666734
SW982	abemaciclib	72	10.01	3810140	4304273	666734
SW982	abemaciclib	72	31.65	3784867	4304273	666734
SW982	abemaciclib	72	100.07	2387554	4304273	666734
SW982	abemaciclib	72	316.46	1574107	4304273	666734
SW982	abemaciclib	72	1000.72	1316754	4304273	666734
SW982	abemaciclib	72	3164.56	1345734	4304273	666734
SW982	abemaciclib	72	10007.2	17427	4304273	666734
SW982	abemaciclib	72	31645.6	16527	4304273	666734
T24	abemaciclib	72	3.16	6381220	5679990	658080
T24	abemaciclib	72	10.01	6022447	5679990	658080
T24	abemaciclib	72	31.65	5701567	5679990	658080
T24	abemaciclib	72	100.07	4798820	5679990	658080
T24	abemaciclib	72	316.46	4171093	5679990	658080
T24	abemaciclib	72	1000.72	3392620	5679990	658080
T24	abemaciclib	72	3164.56	19467	5679990	658080
T24	abemaciclib	72	10007.2	1900	5679990	658080
T24	abemaciclib	72	31645.6	5927	5679990	658080
T98G	abemaciclib	72	3.16	7018987	6968297	1132934
T98G	abemaciclib	72	10.01	6803494	6968297	1132934
T98G	abemaciclib	72	31.65	6422140	6968297	1132934
T98G	abemaciclib	72	100.07	5879793	6968297	1132934
T98G	abemaciclib	72	316.46	4841347	6968297	1132934
T98G	abemaciclib	72	1000.72	4168093	6968297	1132934
T98G	abemaciclib	72	3164.56	3336473	6968297	1132934
T98G	abemaciclib	72	10007.2	12654	6968297	1132934
T98G	abemaciclib	72	31645.6	567	6968297	1132934
TCCSUP	abemaciclib	72	3.16	1598907	1572593	396727
TCCSUP	abemaciclib	72	10.01	1624687	1572593	396727
TCCSUP	abemaciclib	72	31.65	1838193	1572593	396727
TCCSUP	abemaciclib	72	100.07	1556034	1572593	396727
TCCSUP	abemaciclib	72	316.46	1603874	1572593	396727
TCCSUP	abemaciclib	72	1000.72	1431333	1572593	396727
TCCSUP	abemaciclib	72	3164.56	1424240	1572593	396727
TCCSUP	abemaciclib	72	10007.2	29860	1572593	396727
TCCSUP	abemaciclib	72	31645.6	16853	1572593	396727
THP-1	abemaciclib	72	3.16	10051194	9629907	3754640
THP-1	abemaciclib	72	10.01	9915534	9629907	3754640
THP-1	abemaciclib	72	31.65	10248734	9629907	3754640
THP-1	abemaciclib	72	100.07	9879100	9629907	3754640
THP-1	abemaciclib	72	316.46	8798300	9629907	3754640
THP-1	abemaciclib	72	1000.72	8413667	9629907	3754640
THP-1	abemaciclib	72	3164.56	8283880	9629907	3754640
THP-1	abemaciclib	72	10007.2	7014780	9629907	3754640
THP-1	abemaciclib	72	31645.6	48034	9629907	3754640
TT	abemaciclib	72	3.16	798980	849307	518007
TT	abemaciclib	72	10.01	835040	849307	518007
TT	abemaciclib	72	31.65	747167	849307	518007
TT	abemaciclib	72	100.07	633560	849307	518007
TT	abemaciclib	72	316.46	588614	849307	518007
TT	abemaciclib	72	1000.72	473174	849307	518007
TT	abemaciclib	72	3164.56	317060	849307	518007
TT	abemaciclib	72	10007.2	62060	849307	518007
TT	abemaciclib	72	31645.6	507	849307	518007
U-118 MG	abemaciclib	72	3.16	2757113	2699060	495987
U-118 MG	abemaciclib	72	10.01	2559714	2699060	495987
U-118 MG	abemaciclib	72	31.65	2365687	2699060	495987
U-118 MG	abemaciclib	72	100.07	2505787	2699060	495987
U-118 MG	abemaciclib	72	316.46	2425254	2699060	495987
U-118 MG	abemaciclib	72	1000.72	2159693	2699060	495987
U-118 MG	abemaciclib	72	3164.56	2289580	2699060	495987
U-118 MG	abemaciclib	72	10007.2	20327	2699060	495987
U-118 MG	abemaciclib	72	31645.6	5880	2699060	495987
U-2 OS	abemaciclib	72	3.16	2758180	2649390	494480
U-2 OS	abemaciclib	72	10.01	2718094	2649390	494480
U-2 OS	abemaciclib	72	31.65	2732314	2649390	494480
U-2 OS	abemaciclib	72	100.07	2583653	2649390	494480
U-2 OS	abemaciclib	72	316.46	2158674	2649390	494480
U-2 OS	abemaciclib	72	1000.72	1742634	2649390	494480
U-2 OS	abemaciclib	72	3164.56	13900	2649390	494480
U-2 OS	abemaciclib	72	10007.2	1114	2649390	494480
U-2 OS	abemaciclib	72	31645.6	10067	2649390	494480
U-87 MG	abemaciclib	72	3.16	3691460	3853150	708680
U-87 MG	abemaciclib	72	10.01	3502594	3853150	708680
U-87 MG	abemaciclib	72	31.65	3584960	3853150	708680
U-87 MG	abemaciclib	72	100.07	2866707	3853150	708680
U-87 MG	abemaciclib	72	316.46	2761427	3853150	708680
U-87 MG	abemaciclib	72	1000.72	2924500	3853150	708680
U-87 MG	abemaciclib	72	3164.56	2963173	3853150	708680
U-87 MG	abemaciclib	72	10007.2	27420	3853150	708680
U-87 MG	abemaciclib	72	31645.6	7714	3853150	708680
VA-ES-BJ	abemaciclib	72	3.16	2927414	2948937	845160
VA-ES-BJ	abemaciclib	72	10.01	2896214	2948937	845160
VA-ES-BJ	abemaciclib	72	31.65	2326953	2948937	845160
VA-ES-BJ	abemaciclib	72	100.07	2106460	2948937	845160
VA-ES-BJ	abemaciclib	72	316.46	1723247	2948937	845160
VA-ES-BJ	abemaciclib	72	1000.72	1651527	2948937	845160
VA-ES-BJ	abemaciclib	72	3164.56	1476380	2948937	845160
VA-ES-BJ	abemaciclib	72	10007.2	5453	2948937	845160
VA-ES-BJ	abemaciclib	72	31645.6	4787	2948937	845160
5637	acalabrutinib	72	3.16	1935327	1814767	349844
5637	acalabrutinib	72	10.01	1857320	1814767	349844
5637	acalabrutinib	72	31.65	1800540	1814767	349844
5637	acalabrutinib	72	100.07	1877814	1814767	349844
5637	acalabrutinib	72	316.46	1709827	1814767	349844
5637	acalabrutinib	72	1000.72	1484534	1814767	349844
5637	acalabrutinib	72	3164.56	1612634	1814767	349844
5637	acalabrutinib	72	10007.2	1473534	1814767	349844
5637	acalabrutinib	72	31645.6	1394667	1814767	349844
769-P	acalabrutinib	72	3.16	6135854	6360844	806287
769-P	acalabrutinib	72	10.01	6068007	6360844	806287
769-P	acalabrutinib	72	31.65	5951393	6360844	806287
769-P	acalabrutinib	72	100.07	6345454	6360844	806287
769-P	acalabrutinib	72	316.46	6319340	6360844	806287
769-P	acalabrutinib	72	1000.72	6269260	6360844	806287
769-P	acalabrutinib	72	3164.56	6138467	6360844	806287
769-P	acalabrutinib	72	10007.2	5356920	6360844	806287
769-P	acalabrutinib	72	31645.6	4144320	6360844	806287
786-O	acalabrutinib	72	3.16	5392373	4539933	431677
786-O	acalabrutinib	72	10.01	4804014	4539933	431677
786-O	acalabrutinib	72	31.65	4537887	4539933	431677
786-O	acalabrutinib	72	100.07	4722800	4539933	431677
786-O	acalabrutinib	72	316.46	4546667	4539933	431677
786-O	acalabrutinib	72	1000.72	4864834	4539933	431677
786-O	acalabrutinib	72	3164.56	4022580	4539933	431677
786-O	acalabrutinib	72	10007.2	4186180	4539933	431677
786-O	acalabrutinib	72	31645.6	3245167	4539933	431677
A-172	acalabrutinib	72	3.16	1918014	1851600	541734
A-172	acalabrutinib	72	10.01	1887967	1851600	541734
A-172	acalabrutinib	72	31.65	1769240	1851600	541734
A-172	acalabrutinib	72	100.07	1824954	1851600	541734
A-172	acalabrutinib	72	316.46	1847613	1851600	541734
A-172	acalabrutinib	72	1000.72	1956147	1851600	541734
A-172	acalabrutinib	72	3164.56	1896060	1851600	541734
A-172	acalabrutinib	72	10007.2	1559767	1851600	541734
A-172	acalabrutinib	72	31645.6	1187040	1851600	541734
A-204	acalabrutinib	72	3.16	947633	1117683	308227
A-204	acalabrutinib	72	10.01	1107127	1117683	308227
A-204	acalabrutinib	72	31.65	1023174	1117683	308227
A-204	acalabrutinib	72	100.07	1187200	1117683	308227
A-204	acalabrutinib	72	316.46	1134514	1117683	308227
A-204	acalabrutinib	72	1000.72	1188294	1117683	308227
A-204	acalabrutinib	72	3164.56	1104374	1117683	308227
A-204	acalabrutinib	72	10007.2	1114120	1117683	308227
A-204	acalabrutinib	72	31645.6	763467	1117683	308227
A-427	acalabrutinib	72	3.16	2057600	2260483	258400
A-427	acalabrutinib	72	10.01	2094267	2260483	258400
A-427	acalabrutinib	72	31.65	1710907	2260483	258400
A-427	acalabrutinib	72	100.07	2149740	2260483	258400
A-427	acalabrutinib	72	316.46	1903200	2260483	258400
A-427	acalabrutinib	72	1000.72	1964574	2260483	258400
A-427	acalabrutinib	72	3164.56	1807567	2260483	258400
A-427	acalabrutinib	72	10007.2	1623714	2260483	258400
A-427	acalabrutinib	72	31645.6	1460020	2260483	258400
A-498	acalabrutinib	72	3.16	1981614	2250717	293084
A-498	acalabrutinib	72	10.01	2455547	2250717	293084
A-498	acalabrutinib	72	31.65	2169200	2250717	293084
A-498	acalabrutinib	72	100.07	2617180	2250717	293084
A-498	acalabrutinib	72	316.46	2409627	2250717	293084
A-498	acalabrutinib	72	1000.72	2313547	2250717	293084
A-498	acalabrutinib	72	3164.56	2229720	2250717	293084
A-498	acalabrutinib	72	10007.2	1990340	2250717	293084
A-498	acalabrutinib	72	31645.6	1353587	2250717	293084
A-549	acalabrutinib	72	3.16	6430640	5996284	878387
A-549	acalabrutinib	72	10.01	5656927	5996284	878387
A-549	acalabrutinib	72	31.65	5937700	5996284	878387
A-549	acalabrutinib	72	100.07	6567747	5996284	878387
A-549	acalabrutinib	72	316.46	6276880	5996284	878387
A-549	acalabrutinib	72	1000.72	6333547	5996284	878387
A-549	acalabrutinib	72	3164.56	5793894	5996284	878387
A-549	acalabrutinib	72	10007.2	5535680	5996284	878387
A-549	acalabrutinib	72	31645.6	3528207	5996284	878387
A-704	acalabrutinib	72	3.16	5593520	5553283	2247960
A-704	acalabrutinib	72	10.01	5483393	5553283	2247960
A-704	acalabrutinib	72	31.65	5695313	5553283	2247960
A-704	acalabrutinib	72	100.07	5667794	5553283	2247960
A-704	acalabrutinib	72	316.46	5548087	5553283	2247960
A-704	acalabrutinib	72	1000.72	5572307	5553283	2247960
A-704	acalabrutinib	72	3164.56	5196694	5553283	2247960
A-704	acalabrutinib	72	10007.2	4997414	5553283	2247960
A-704	acalabrutinib	72	31645.6	4065800	5553283	2247960
A375	acalabrutinib	72	3.16	6062320	6361780	658447
A375	acalabrutinib	72	10.01	6170267	6361780	658447
A375	acalabrutinib	72	31.65	5975527	6361780	658447
A375	acalabrutinib	72	100.07	6392453	6361780	658447
A375	acalabrutinib	72	316.46	6212547	6361780	658447
A375	acalabrutinib	72	1000.72	5956700	6361780	658447
A375	acalabrutinib	72	3164.56	6068127	6361780	658447
A375	acalabrutinib	72	10007.2	5667514	6361780	658447
A375	acalabrutinib	72	31645.6	3741767	6361780	658447
A388	acalabrutinib	72	3.16	1501374	1636273	396780
A388	acalabrutinib	72	10.01	1612147	1636273	396780
A388	acalabrutinib	72	31.65	1436520	1636273	396780
A388	acalabrutinib	72	100.07	1596033	1636273	396780
A388	acalabrutinib	72	316.46	1451974	1636273	396780
A388	acalabrutinib	72	1000.72	1521114	1636273	396780
A388	acalabrutinib	72	3164.56	1498060	1636273	396780
A388	acalabrutinib	72	10007.2	1335767	1636273	396780
A388	acalabrutinib	72	31645.6	1021120	1636273	396780
ACHN	acalabrutinib	72	3.16	5387927	5366814	685257
ACHN	acalabrutinib	72	10.01	5461827	5366814	685257
ACHN	acalabrutinib	72	31.65	5559000	5366814	685257
ACHN	acalabrutinib	72	100.07	5461300	5366814	685257
ACHN	acalabrutinib	72	316.46	5365320	5366814	685257
ACHN	acalabrutinib	72	1000.72	5441074	5366814	685257
ACHN	acalabrutinib	72	3164.56	4758713	5366814	685257
ACHN	acalabrutinib	72	10007.2	4011700	5366814	685257
ACHN	acalabrutinib	72	31645.6	2920007	5366814	685257
AN3 CA	acalabrutinib	72	3.16	631300	642440	114083
AN3 CA	acalabrutinib	72	10.01	611234	642440	114083
AN3 CA	acalabrutinib	72	31.65	563487	642440	114083
AN3 CA	acalabrutinib	72	100.07	577893	642440	114083
AN3 CA	acalabrutinib	72	316.46	523613	642440	114083
AN3 CA	acalabrutinib	72	1000.72	609207	642440	114083
AN3 CA	acalabrutinib	72	3164.56	596954	642440	114083
AN3 CA	acalabrutinib	72	10007.2	523373	642440	114083
AN3 CA	acalabrutinib	72	31645.6	358920	642440	114083
AsPC-1	acalabrutinib	72	3.16	3504160	3562633	885794
AsPC-1	acalabrutinib	72	10.01	3423447	3562633	885794
AsPC-1	acalabrutinib	72	31.65	3716287	3562633	885794
AsPC-1	acalabrutinib	72	100.07	4037494	3562633	885794
AsPC-1	acalabrutinib	72	316.46	3436420	3562633	885794
AsPC-1	acalabrutinib	72	1000.72	3611140	3562633	885794
AsPC-1	acalabrutinib	72	3164.56	3775740	3562633	885794
AsPC-1	acalabrutinib	72	10007.2	3593167	3562633	885794
AsPC-1	acalabrutinib	72	31645.6	3179487	3562633	885794
AU-565	acalabrutinib	72	3.16	1874573	1814313	564064
AU-565	acalabrutinib	72	10.01	1677447	1814313	564064
AU-565	acalabrutinib	72	31.65	1860814	1814313	564064
AU-565	acalabrutinib	72	100.07	1566787	1814313	564064
AU-565	acalabrutinib	72	316.46	1358220	1814313	564064
AU-565	acalabrutinib	72	1000.72	816760	1814313	564064
AU-565	acalabrutinib	72	3164.56	381053	1814313	564064
AU-565	acalabrutinib	72	10007.2	235527	1814313	564064
AU-565	acalabrutinib	72	31645.6	197974	1814313	564064
BL-70	acalabrutinib	72	1	7466427	7167850	550510
BL-70	acalabrutinib	72	3.16	7499047	7167850	550510
BL-70	acalabrutinib	72	10	7394680	7167850	550510
BL-70	acalabrutinib	72	31.62	7315234	7167850	550510
BL-70	acalabrutinib	72	100	7488307	7167850	550510
BL-70	acalabrutinib	72	316.23	7654447	7167850	550510
BL-70	acalabrutinib	72	1000	7788460	7167850	550510
BL-70	acalabrutinib	72	3162.28	7372100	7167850	550510
BL-70	acalabrutinib	72	10000	7066174	7167850	550510
BT-20	acalabrutinib	72	3.16	3699787	3678197	1372827
BT-20	acalabrutinib	72	10.01	3668287	3678197	1372827
BT-20	acalabrutinib	72	31.65	3643187	3678197	1372827
BT-20	acalabrutinib	72	100.07	3497547	3678197	1372827
BT-20	acalabrutinib	72	316.46	3579040	3678197	1372827
BT-20	acalabrutinib	72	1000.72	3390760	3678197	1372827
BT-20	acalabrutinib	72	3164.56	3411094	3678197	1372827
BT-20	acalabrutinib	72	10007.2	3494840	3678197	1372827
BT-20	acalabrutinib	72	31645.6	3172487	3678197	1372827
BT-474	acalabrutinib	72	1	2875014	2908174	1512537
BT-474	acalabrutinib	72	3.16	2755334	2908174	1512537
BT-474	acalabrutinib	72	10	2836700	2908174	1512537
BT-474	acalabrutinib	72	31.62	2747500	2908174	1512537
BT-474	acalabrutinib	72	100	2671580	2908174	1512537
BT-474	acalabrutinib	72	316.23	2585647	2908174	1512537
BT-474	acalabrutinib	72	1000	2126867	2908174	1512537
BT-474	acalabrutinib	72	3162.28	1553627	2908174	1512537
BT-474	acalabrutinib	72	10000	1271820	2908174	1512537
BT-549	acalabrutinib	72	3.16	2335354	2673080	411747
BT-549	acalabrutinib	72	10.01	2674740	2673080	411747
BT-549	acalabrutinib	72	31.65	2761287	2673080	411747
BT-549	acalabrutinib	72	100.07	2468187	2673080	411747
BT-549	acalabrutinib	72	316.46	2431660	2673080	411747
BT-549	acalabrutinib	72	1000.72	2418140	2673080	411747
BT-549	acalabrutinib	72	3164.56	2170167	2673080	411747
BT-549	acalabrutinib	72	10007.2	2224794	2673080	411747
BT-549	acalabrutinib	72	31645.6	1836860	2673080	411747
BxPC-3	acalabrutinib	72	3.16	1693007	1575160	515637
BxPC-3	acalabrutinib	72	10.01	1592667	1575160	515637
BxPC-3	acalabrutinib	72	31.65	1517534	1575160	515637
BxPC-3	acalabrutinib	72	100.07	1703067	1575160	515637
BxPC-3	acalabrutinib	72	316.46	1615987	1575160	515637
BxPC-3	acalabrutinib	72	1000.72	1636647	1575160	515637
BxPC-3	acalabrutinib	72	3164.56	1519640	1575160	515637
BxPC-3	acalabrutinib	72	10007.2	1509807	1575160	515637
BxPC-3	acalabrutinib	72	31645.6	1191300	1575160	515637
C-33 A	acalabrutinib	72	3.16	3628594	3900407	472477
C-33 A	acalabrutinib	72	10.01	3686840	3900407	472477
C-33 A	acalabrutinib	72	31.65	3981253	3900407	472477
C-33 A	acalabrutinib	72	100.07	4096400	3900407	472477
C-33 A	acalabrutinib	72	316.46	3476687	3900407	472477
C-33 A	acalabrutinib	72	1000.72	3097087	3900407	472477
C-33 A	acalabrutinib	72	3164.56	2184407	3900407	472477
C-33 A	acalabrutinib	72	10007.2	1795847	3900407	472477
C-33 A	acalabrutinib	72	31645.6	1322687	3900407	472477
CAL 27	acalabrutinib	72	3.16	1547974	1497680	171480
CAL 27	acalabrutinib	72	10.01	1411087	1497680	171480
CAL 27	acalabrutinib	72	31.65	1621547	1497680	171480
CAL 27	acalabrutinib	72	100.07	1443493	1497680	171480
CAL 27	acalabrutinib	72	316.46	1438227	1497680	171480
CAL 27	acalabrutinib	72	1000.72	1472320	1497680	171480
CAL 27	acalabrutinib	72	3164.56	1253514	1497680	171480
CAL 27	acalabrutinib	72	10007.2	1315920	1497680	171480
CAL 27	acalabrutinib	72	31645.6	1001793	1497680	171480
CCF-STTG1	acalabrutinib	72	3.16	968527	967833	304257
CCF-STTG1	acalabrutinib	72	10.01	934294	967833	304257
CCF-STTG1	acalabrutinib	72	31.65	923494	967833	304257
CCF-STTG1	acalabrutinib	72	100.07	1066734	967833	304257
CCF-STTG1	acalabrutinib	72	316.46	909974	967833	304257
CCF-STTG1	acalabrutinib	72	1000.72	901847	967833	304257
CCF-STTG1	acalabrutinib	72	3164.56	907640	967833	304257
CCF-STTG1	acalabrutinib	72	10007.2	1070100	967833	304257
CCF-STTG1	acalabrutinib	72	31645.6	1121513	967833	304257
CCRF-CEM	acalabrutinib	72	3.16	3897694	4141750	833907
CCRF-CEM	acalabrutinib	72	10.01	4065927	4141750	833907
CCRF-CEM	acalabrutinib	72	31.65	3799980	4141750	833907
CCRF-CEM	acalabrutinib	72	100.07	4084860	4141750	833907
CCRF-CEM	acalabrutinib	72	316.46	4025127	4141750	833907
CCRF-CEM	acalabrutinib	72	1000.72	4016794	4141750	833907
CCRF-CEM	acalabrutinib	72	3164.56	4050334	4141750	833907
CCRF-CEM	acalabrutinib	72	10007.2	3923440	4141750	833907
CCRF-CEM	acalabrutinib	72	31645.6	3039554	4141750	833907
COLO 205	acalabrutinib	72	3.16	6767860	6831504	812567
COLO 205	acalabrutinib	72	10.01	7392920	6831504	812567
COLO 205	acalabrutinib	72	31.65	6727834	6831504	812567
COLO 205	acalabrutinib	72	100.07	7559907	6831504	812567
COLO 205	acalabrutinib	72	316.46	7329553	6831504	812567
COLO 205	acalabrutinib	72	1000.72	7183600	6831504	812567
COLO 205	acalabrutinib	72	3164.56	7602173	6831504	812567
COLO 205	acalabrutinib	72	10007.2	6631160	6831504	812567
COLO 205	acalabrutinib	72	31645.6	5478587	6831504	812567
COLO 829	acalabrutinib	72	3.16	2418760	2467024	729413
COLO 829	acalabrutinib	72	10.01	2635700	2467024	729413
COLO 829	acalabrutinib	72	31.65	2222953	2467024	729413
COLO 829	acalabrutinib	72	100.07	2174347	2467024	729413
COLO 829	acalabrutinib	72	316.46	2472014	2467024	729413
COLO 829	acalabrutinib	72	1000.72	2508487	2467024	729413
COLO 829	acalabrutinib	72	3164.56	2372340	2467024	729413
COLO 829	acalabrutinib	72	10007.2	2265520	2467024	729413
COLO 829	acalabrutinib	72	31645.6	2183054	2467024	729413
Daoy	acalabrutinib	72	3.16	6370460	6004277	947107
Daoy	acalabrutinib	72	10.01	6374573	6004277	947107
Daoy	acalabrutinib	72	31.65	6088693	6004277	947107
Daoy	acalabrutinib	72	100.07	6119380	6004277	947107
Daoy	acalabrutinib	72	316.46	6152933	6004277	947107
Daoy	acalabrutinib	72	1000.72	5852733	6004277	947107
Daoy	acalabrutinib	72	3164.56	6117480	6004277	947107
Daoy	acalabrutinib	72	10007.2	6084053	6004277	947107
Daoy	acalabrutinib	72	31645.6	4706747	6004277	947107
DB	acalabrutinib	72	3.16	2351594	2561230	401240
DB	acalabrutinib	72	10.01	2358087	2561230	401240
DB	acalabrutinib	72	31.65	2323034	2561230	401240
DB	acalabrutinib	72	100.07	2311740	2561230	401240
DB	acalabrutinib	72	316.46	2168747	2561230	401240
DB	acalabrutinib	72	1000.72	2396547	2561230	401240
DB	acalabrutinib	72	3164.56	2502287	2561230	401240
DB	acalabrutinib	72	10007.2	2119367	2561230	401240
DB	acalabrutinib	72	31645.6	1840307	2561230	401240
DLD-1	acalabrutinib	72	3.16	10577027	10051323	1021820
DLD-1	acalabrutinib	72	10.01	10729834	10051323	1021820
DLD-1	acalabrutinib	72	31.65	10899740	10051323	1021820
DLD-1	acalabrutinib	72	100.07	9935667	10051323	1021820
DLD-1	acalabrutinib	72	316.46	10524387	10051323	1021820
DLD-1	acalabrutinib	72	1000.72	10679127	10051323	1021820
DLD-1	acalabrutinib	72	3164.56	10794547	10051323	1021820
DLD-1	acalabrutinib	72	10007.2	9955960	10051323	1021820
DLD-1	acalabrutinib	72	31645.6	8582200	10051323	1021820
DOHH-2	acalabrutinib	72	1	9186333	9540580	1688067
DOHH-2	acalabrutinib	72	3.16	8980640	9540580	1688067
DOHH-2	acalabrutinib	72	10	8218787	9540580	1688067
DOHH-2	acalabrutinib	72	31.62	8678880	9540580	1688067
DOHH-2	acalabrutinib	72	100	10044420	9540580	1688067
DOHH-2	acalabrutinib	72	316.23	10232987	9540580	1688067
DOHH-2	acalabrutinib	72	1000	8637400	9540580	1688067
DOHH-2	acalabrutinib	72	3162.28	10301720	9540580	1688067
DOHH-2	acalabrutinib	72	10000	9883600	9540580	1688067
DoTc2 4510	acalabrutinib	72	3.16	960187	1024913	271777
DoTc2 4510	acalabrutinib	72	10.01	992067	1024913	271777
DoTc2 4510	acalabrutinib	72	31.65	1078094	1024913	271777
DoTc2 4510	acalabrutinib	72	100.07	1024240	1024913	271777
DoTc2 4510	acalabrutinib	72	316.46	1112480	1024913	271777
DoTc2 4510	acalabrutinib	72	1000.72	982467	1024913	271777
DoTc2 4510	acalabrutinib	72	3164.56	949447	1024913	271777
DoTc2 4510	acalabrutinib	72	10007.2	740813	1024913	271777
DoTc2 4510	acalabrutinib	72	31645.6	539413	1024913	271777
DU 145	acalabrutinib	72	3.16	4287694	4238583	631000
DU 145	acalabrutinib	72	10.01	4138287	4238583	631000
DU 145	acalabrutinib	72	31.65	4548880	4238583	631000
DU 145	acalabrutinib	72	100.07	4423747	4238583	631000
DU 145	acalabrutinib	72	316.46	4407740	4238583	631000
DU 145	acalabrutinib	72	1000.72	4491700	4238583	631000
DU 145	acalabrutinib	72	3164.56	4329720	4238583	631000
DU 145	acalabrutinib	72	10007.2	3767000	4238583	631000
DU 145	acalabrutinib	72	31645.6	2974460	4238583	631000
DU4475	acalabrutinib	72	3.16	5463894	5367654	1581030
DU4475	acalabrutinib	72	10.01	4985567	5367654	1581030
DU4475	acalabrutinib	72	31.65	5449827	5367654	1581030
DU4475	acalabrutinib	72	100.07	5409580	5367654	1581030
DU4475	acalabrutinib	72	316.46	5401760	5367654	1581030
DU4475	acalabrutinib	72	1000.72	5636207	5367654	1581030
DU4475	acalabrutinib	72	3164.56	5061240	5367654	1581030
DU4475	acalabrutinib	72	10007.2	5099694	5367654	1581030
DU4475	acalabrutinib	72	31645.6	3997773	5367654	1581030
ES-2	acalabrutinib	72	3.16	2161314	2136243	107993
ES-2	acalabrutinib	72	10.01	2034527	2136243	107993
ES-2	acalabrutinib	72	31.65	1882094	2136243	107993
ES-2	acalabrutinib	72	100.07	2418747	2136243	107993
ES-2	acalabrutinib	72	316.46	2119794	2136243	107993
ES-2	acalabrutinib	72	1000.72	2181527	2136243	107993
ES-2	acalabrutinib	72	3164.56	2130180	2136243	107993
ES-2	acalabrutinib	72	10007.2	2406734	2136243	107993
ES-2	acalabrutinib	72	31645.6	2180560	2136243	107993
FaDu	acalabrutinib	72	3.16	2607740	2072254	362020
FaDu	acalabrutinib	72	10.01	2113627	2072254	362020
FaDu	acalabrutinib	72	31.65	2165740	2072254	362020
FaDu	acalabrutinib	72	100.07	2350234	2072254	362020
FaDu	acalabrutinib	72	316.46	2174954	2072254	362020
FaDu	acalabrutinib	72	1000.72	1710407	2072254	362020
FaDu	acalabrutinib	72	3164.56	1907854	2072254	362020
FaDu	acalabrutinib	72	10007.2	1509813	2072254	362020
FaDu	acalabrutinib	72	31645.6	1043160	2072254	362020
G-361	acalabrutinib	72	3.16	1545360	1570210	442787
G-361	acalabrutinib	72	10.01	1538574	1570210	442787
G-361	acalabrutinib	72	31.65	1764314	1570210	442787
G-361	acalabrutinib	72	100.07	1670847	1570210	442787
G-361	acalabrutinib	72	316.46	1552594	1570210	442787
G-361	acalabrutinib	72	1000.72	1403327	1570210	442787
G-361	acalabrutinib	72	3164.56	1576320	1570210	442787
G-361	acalabrutinib	72	10007.2	1422300	1570210	442787
G-361	acalabrutinib	72	31645.6	1259534	1570210	442787
HCT-15	acalabrutinib	72	3.16	8039960	7261480	523974
HCT-15	acalabrutinib	72	10.01	7512300	7261480	523974
HCT-15	acalabrutinib	72	31.65	7472060	7261480	523974
HCT-15	acalabrutinib	72	100.07	6900767	7261480	523974
HCT-15	acalabrutinib	72	316.46	7297233	7261480	523974
HCT-15	acalabrutinib	72	1000.72	7136153	7261480	523974
HCT-15	acalabrutinib	72	3164.56	7443280	7261480	523974
HCT-15	acalabrutinib	72	10007.2	8186893	7261480	523974
HCT-15	acalabrutinib	72	31645.6	6127507	7261480	523974
HCT 116	acalabrutinib	72	3.16	3911807	3327067	232620
HCT 116	acalabrutinib	72	10.01	3470467	3327067	232620
HCT 116	acalabrutinib	72	31.65	3870180	3327067	232620
HCT 116	acalabrutinib	72	100.07	3400320	3327067	232620
HCT 116	acalabrutinib	72	316.46	3462634	3327067	232620
HCT 116	acalabrutinib	72	1000.72	3634267	3327067	232620
HCT 116	acalabrutinib	72	3164.56	3214167	3327067	232620
HCT 116	acalabrutinib	72	10007.2	3258194	3327067	232620
HCT 116	acalabrutinib	72	31645.6	2259627	3327067	232620
HL-60	acalabrutinib	72	3.16	1966694	1975793	634893
HL-60	acalabrutinib	72	10.01	2040974	1975793	634893
HL-60	acalabrutinib	72	31.65	1986574	1975793	634893
HL-60	acalabrutinib	72	100.07	1938640	1975793	634893
HL-60	acalabrutinib	72	316.46	1998287	1975793	634893
HL-60	acalabrutinib	72	1000.72	2083560	1975793	634893
HL-60	acalabrutinib	72	3164.56	2242447	1975793	634893
HL-60	acalabrutinib	72	10007.2	2432214	1975793	634893
HL-60	acalabrutinib	72	31645.6	2491600	1975793	634893
Hs 578T	acalabrutinib	72	3.16	1939893	2116673	478283
Hs 578T	acalabrutinib	72	10.01	2027807	2116673	478283
Hs 578T	acalabrutinib	72	31.65	1811967	2116673	478283
Hs 578T	acalabrutinib	72	100.07	1873547	2116673	478283
Hs 578T	acalabrutinib	72	316.46	1878940	2116673	478283
Hs 578T	acalabrutinib	72	1000.72	1930427	2116673	478283
Hs 578T	acalabrutinib	72	3164.56	1937214	2116673	478283
Hs 578T	acalabrutinib	72	10007.2	1703180	2116673	478283
Hs 578T	acalabrutinib	72	31645.6	1326454	2116673	478283
Hs 746T	acalabrutinib	72	3.16	1045720	1247480	365147
Hs 746T	acalabrutinib	72	10.01	1030687	1247480	365147
Hs 746T	acalabrutinib	72	31.65	1195894	1247480	365147
Hs 746T	acalabrutinib	72	100.07	1051134	1247480	365147
Hs 746T	acalabrutinib	72	316.46	1117060	1247480	365147
Hs 746T	acalabrutinib	72	1000.72	1117674	1247480	365147
Hs 746T	acalabrutinib	72	3164.56	1075394	1247480	365147
Hs 746T	acalabrutinib	72	10007.2	818034	1247480	365147
Hs 746T	acalabrutinib	72	31645.6	582667	1247480	365147
Hs 766T	acalabrutinib	72	3.16	846753	766490	247730
Hs 766T	acalabrutinib	72	10.01	911167	766490	247730
Hs 766T	acalabrutinib	72	31.65	808860	766490	247730
Hs 766T	acalabrutinib	72	100.07	809587	766490	247730
Hs 766T	acalabrutinib	72	316.46	856140	766490	247730
Hs 766T	acalabrutinib	72	1000.72	821620	766490	247730
Hs 766T	acalabrutinib	72	3164.56	829640	766490	247730
Hs 766T	acalabrutinib	72	10007.2	734894	766490	247730
Hs 766T	acalabrutinib	72	31645.6	769673	766490	247730
HT	acalabrutinib	72	3.16	4800434	4696970	923380
HT	acalabrutinib	72	10.01	5012434	4696970	923380
HT	acalabrutinib	72	31.65	4964667	4696970	923380
HT	acalabrutinib	72	100.07	4577594	4696970	923380
HT	acalabrutinib	72	316.46	4837613	4696970	923380
HT	acalabrutinib	72	1000.72	4724220	4696970	923380
HT	acalabrutinib	72	3164.56	5076100	4696970	923380
HT	acalabrutinib	72	10007.2	5226333	4696970	923380
HT	acalabrutinib	72	31645.6	5399907	4696970	923380
HT-1080	acalabrutinib	72	3.16	2094400	1743830	84427
HT-1080	acalabrutinib	72	10.01	2034934	1743830	84427
HT-1080	acalabrutinib	72	31.65	2702747	1743830	84427
HT-1080	acalabrutinib	72	100.07	2555360	1743830	84427
HT-1080	acalabrutinib	72	316.46	2178127	1743830	84427
HT-1080	acalabrutinib	72	1000.72	2819247	1743830	84427
HT-1080	acalabrutinib	72	3164.56	1889780	1743830	84427
HT-1080	acalabrutinib	72	10007.2	2106047	1743830	84427
HT-1080	acalabrutinib	72	31645.6	1774620	1743830	84427
HuTu 80	acalabrutinib	72	3.16	5499514	4945847	377863
HuTu 80	acalabrutinib	72	10.01	5066740	4945847	377863
HuTu 80	acalabrutinib	72	31.65	5229414	4945847	377863
HuTu 80	acalabrutinib	72	100.07	5355934	4945847	377863
HuTu 80	acalabrutinib	72	316.46	4765627	4945847	377863
HuTu 80	acalabrutinib	72	1000.72	4835287	4945847	377863
HuTu 80	acalabrutinib	72	3164.56	4444680	4945847	377863
HuTu 80	acalabrutinib	72	10007.2	4574580	4945847	377863
HuTu 80	acalabrutinib	72	31645.6	3186967	4945847	377863
J82	acalabrutinib	72	3.16	3696627	3461357	735053
J82	acalabrutinib	72	10.01	3450807	3461357	735053
J82	acalabrutinib	72	31.65	3492140	3461357	735053
J82	acalabrutinib	72	100.07	3566134	3461357	735053
J82	acalabrutinib	72	316.46	3499200	3461357	735053
J82	acalabrutinib	72	1000.72	3422640	3461357	735053
J82	acalabrutinib	72	3164.56	3395980	3461357	735053
J82	acalabrutinib	72	10007.2	3290500	3461357	735053
J82	acalabrutinib	72	31645.6	3035933	3461357	735053
JAR	acalabrutinib	72	3.16	3259074	3221720	259940
JAR	acalabrutinib	72	10.01	4053460	3221720	259940
JAR	acalabrutinib	72	31.65	3896040	3221720	259940
JAR	acalabrutinib	72	100.07	3816053	3221720	259940
JAR	acalabrutinib	72	316.46	3879787	3221720	259940
JAR	acalabrutinib	72	1000.72	3562394	3221720	259940
JAR	acalabrutinib	72	3164.56	3656134	3221720	259940
JAR	acalabrutinib	72	10007.2	2937354	3221720	259940
JAR	acalabrutinib	72	31645.6	1963634	3221720	259940
JM-1	acalabrutinib	72	1	2330707	2137283	458297
JM-1	acalabrutinib	72	3.16	2336127	2137283	458297
JM-1	acalabrutinib	72	10	2056040	2137283	458297
JM-1	acalabrutinib	72	31.62	2062807	2137283	458297
JM-1	acalabrutinib	72	100	2019327	2137283	458297
JM-1	acalabrutinib	72	316.23	2007914	2137283	458297
JM-1	acalabrutinib	72	1000	2071880	2137283	458297
JM-1	acalabrutinib	72	3162.28	1729500	2137283	458297
JM-1	acalabrutinib	72	10000	1822227	2137283	458297
Jurkat E6-1	acalabrutinib	72	3.16	2415613	2205130	454400
Jurkat E6-1	acalabrutinib	72	10.01	2308294	2205130	454400
Jurkat E6-1	acalabrutinib	72	31.65	2501340	2205130	454400
Jurkat E6-1	acalabrutinib	72	100.07	2372727	2205130	454400
Jurkat E6-1	acalabrutinib	72	316.46	2435573	2205130	454400
Jurkat E6-1	acalabrutinib	72	1000.72	2625207	2205130	454400
Jurkat E6-1	acalabrutinib	72	3164.56	2343120	2205130	454400
Jurkat E6-1	acalabrutinib	72	10007.2	2220494	2205130	454400
Jurkat E6-1	acalabrutinib	72	31645.6	1549894	2205130	454400
K-562	acalabrutinib	72	3.16	7074193	7560254	567843
K-562	acalabrutinib	72	10.01	7465100	7560254	567843
K-562	acalabrutinib	72	31.65	7791307	7560254	567843
K-562	acalabrutinib	72	100.07	7130433	7560254	567843
K-562	acalabrutinib	72	316.46	7744700	7560254	567843
K-562	acalabrutinib	72	1000.72	7630560	7560254	567843
K-562	acalabrutinib	72	3164.56	7217574	7560254	567843
K-562	acalabrutinib	72	10007.2	7161494	7560254	567843
K-562	acalabrutinib	72	31645.6	5746920	7560254	567843
KATO III	acalabrutinib	72	3.16	2185667	2138540	445017
KATO III	acalabrutinib	72	10.01	2354054	2138540	445017
KATO III	acalabrutinib	72	31.65	2196880	2138540	445017
KATO III	acalabrutinib	72	100.07	2311247	2138540	445017
KATO III	acalabrutinib	72	316.46	2111040	2138540	445017
KATO III	acalabrutinib	72	1000.72	2259967	2138540	445017
KATO III	acalabrutinib	72	3164.56	1889467	2138540	445017
KATO III	acalabrutinib	72	10007.2	1853614	2138540	445017
KATO III	acalabrutinib	72	31645.6	1068440	2138540	445017
KG-1	acalabrutinib	72	3.16	2008573	1995057	667737
KG-1	acalabrutinib	72	10.01	2059393	1995057	667737
KG-1	acalabrutinib	72	31.65	2017874	1995057	667737
KG-1	acalabrutinib	72	100.07	2038627	1995057	667737
KG-1	acalabrutinib	72	316.46	2034760	1995057	667737
KG-1	acalabrutinib	72	1000.72	1987407	1995057	667737
KG-1	acalabrutinib	72	3164.56	2040520	1995057	667737
KG-1	acalabrutinib	72	10007.2	2000334	1995057	667737
KG-1	acalabrutinib	72	31645.6	1654640	1995057	667737
KLE	acalabrutinib	72	3.16	3058147	2829544	1249397
KLE	acalabrutinib	72	10.01	2934387	2829544	1249397
KLE	acalabrutinib	72	31.65	2762827	2829544	1249397
KLE	acalabrutinib	72	100.07	2826893	2829544	1249397
KLE	acalabrutinib	72	316.46	2773013	2829544	1249397
KLE	acalabrutinib	72	1000.72	2555007	2829544	1249397
KLE	acalabrutinib	72	3164.56	2523520	2829544	1249397
KLE	acalabrutinib	72	10007.2	2197727	2829544	1249397
KLE	acalabrutinib	72	31645.6	1690280	2829544	1249397
KU812	acalabrutinib	72	3.16	1906474	1733847	689637
KU812	acalabrutinib	72	10.01	1748600	1733847	689637
KU812	acalabrutinib	72	31.65	1804734	1733847	689637
KU812	acalabrutinib	72	100.07	1624620	1733847	689637
KU812	acalabrutinib	72	316.46	1642154	1733847	689637
KU812	acalabrutinib	72	1000.72	1774887	1733847	689637
KU812	acalabrutinib	72	3164.56	1686900	1733847	689637
KU812	acalabrutinib	72	10007.2	1644600	1733847	689637
KU812	acalabrutinib	72	31645.6	1185687	1733847	689637
LNCaP FGC	acalabrutinib	72	3.16	4895427	4761677	1754097
LNCaP FGC	acalabrutinib	72	10.01	4543827	4761677	1754097
LNCaP FGC	acalabrutinib	72	31.65	4601727	4761677	1754097
LNCaP FGC	acalabrutinib	72	100.07	4890847	4761677	1754097
LNCaP FGC	acalabrutinib	72	316.46	4456380	4761677	1754097
LNCaP FGC	acalabrutinib	72	1000.72	4990107	4761677	1754097
LNCaP FGC	acalabrutinib	72	3164.56	4540480	4761677	1754097
LNCaP FGC	acalabrutinib	72	10007.2	4412007	4761677	1754097
LNCaP FGC	acalabrutinib	72	31645.6	3495440	4761677	1754097
LoVo	acalabrutinib	72	3.16	1906214	1902663	278673
LoVo	acalabrutinib	72	10.01	1879960	1902663	278673
LoVo	acalabrutinib	72	31.65	1787294	1902663	278673
LoVo	acalabrutinib	72	100.07	1884493	1902663	278673
LoVo	acalabrutinib	72	316.46	2120067	1902663	278673
LoVo	acalabrutinib	72	1000.72	2113434	1902663	278673
LoVo	acalabrutinib	72	3164.56	1869254	1902663	278673
LoVo	acalabrutinib	72	10007.2	1967767	1902663	278673
LoVo	acalabrutinib	72	31645.6	1570114	1902663	278673
LS 174T	acalabrutinib	72	3.16	902740	1006777	89203
LS 174T	acalabrutinib	72	10.01	1047734	1006777	89203
LS 174T	acalabrutinib	72	31.65	1004674	1006777	89203
LS 174T	acalabrutinib	72	100.07	971087	1006777	89203
LS 174T	acalabrutinib	72	316.46	900227	1006777	89203
LS 174T	acalabrutinib	72	1000.72	892440	1006777	89203
LS 174T	acalabrutinib	72	3164.56	926153	1006777	89203
LS 174T	acalabrutinib	72	10007.2	802000	1006777	89203
LS 174T	acalabrutinib	72	31645.6	650254	1006777	89203
LS411N	acalabrutinib	72	3.16	8418700	8202127	1460643
LS411N	acalabrutinib	72	10.01	8132053	8202127	1460643
LS411N	acalabrutinib	72	31.65	8217814	8202127	1460643
LS411N	acalabrutinib	72	100.07	8377727	8202127	1460643
LS411N	acalabrutinib	72	316.46	8109267	8202127	1460643
LS411N	acalabrutinib	72	1000.72	8852640	8202127	1460643
LS411N	acalabrutinib	72	3164.56	8392040	8202127	1460643
LS411N	acalabrutinib	72	10007.2	9032247	8202127	1460643
LS411N	acalabrutinib	72	31645.6	7814060	8202127	1460643
MCF7	acalabrutinib	72	3.16	3629453	3410160	1300100
MCF7	acalabrutinib	72	10.01	3432693	3410160	1300100
MCF7	acalabrutinib	72	31.65	3214874	3410160	1300100
MCF7	acalabrutinib	72	100.07	3504934	3410160	1300100
MCF7	acalabrutinib	72	316.46	3464134	3410160	1300100
MCF7	acalabrutinib	72	1000.72	3591960	3410160	1300100
MCF7	acalabrutinib	72	3164.56	3512387	3410160	1300100
MCF7	acalabrutinib	72	10007.2	3484934	3410160	1300100
MCF7	acalabrutinib	72	31645.6	2803347	3410160	1300100
MDA-MB-231	acalabrutinib	72	1	2213220	2145100	137453
MDA-MB-231	acalabrutinib	72	3.16	2147480	2145100	137453
MDA-MB-231	acalabrutinib	72	10	2171707	2145100	137453
MDA-MB-231	acalabrutinib	72	31.62	2232893	2145100	137453
MDA-MB-231	acalabrutinib	72	100	2070900	2145100	137453
MDA-MB-231	acalabrutinib	72	316.23	1942627	2145100	137453
MDA-MB-231	acalabrutinib	72	1000	2065554	2145100	137453
MDA-MB-231	acalabrutinib	72	3162.28	1841380	2145100	137453
MDA-MB-231	acalabrutinib	72	10000	1923494	2145100	137453
MeWo	acalabrutinib	72	3.16	2607780	2493884	563527
MeWo	acalabrutinib	72	10.01	2545900	2493884	563527
MeWo	acalabrutinib	72	31.65	2504440	2493884	563527
MeWo	acalabrutinib	72	100.07	2500127	2493884	563527
MeWo	acalabrutinib	72	316.46	2446153	2493884	563527
MeWo	acalabrutinib	72	1000.72	2531413	2493884	563527
MeWo	acalabrutinib	72	3164.56	2356014	2493884	563527
MeWo	acalabrutinib	72	10007.2	2216794	2493884	563527
MeWo	acalabrutinib	72	31645.6	1776207	2493884	563527
MG-63	acalabrutinib	72	3.16	8057013	7926943	1264997
MG-63	acalabrutinib	72	10.01	8112293	7926943	1264997
MG-63	acalabrutinib	72	31.65	8159787	7926943	1264997
MG-63	acalabrutinib	72	100.07	8259147	7926943	1264997
MG-63	acalabrutinib	72	316.46	8283920	7926943	1264997
MG-63	acalabrutinib	72	1000.72	8287247	7926943	1264997
MG-63	acalabrutinib	72	3164.56	8108560	7926943	1264997
MG-63	acalabrutinib	72	10007.2	7875100	7926943	1264997
MG-63	acalabrutinib	72	31645.6	6437734	7926943	1264997
MIA PaCa-2	acalabrutinib	72	3.16	9515000	10338837	1186867
MIA PaCa-2	acalabrutinib	72	10.01	10538320	10338837	1186867
MIA PaCa-2	acalabrutinib	72	31.65	10593980	10338837	1186867
MIA PaCa-2	acalabrutinib	72	100.07	10112287	10338837	1186867
MIA PaCa-2	acalabrutinib	72	316.46	9858220	10338837	1186867
MIA PaCa-2	acalabrutinib	72	1000.72	10584627	10338837	1186867
MIA PaCa-2	acalabrutinib	72	3164.56	10188373	10338837	1186867
MIA PaCa-2	acalabrutinib	72	10007.2	9901494	10338837	1186867
MIA PaCa-2	acalabrutinib	72	31645.6	8641753	10338837	1186867
MOLT-4	acalabrutinib	72	3.16	7075880	6814997	1246867
MOLT-4	acalabrutinib	72	10.01	6879667	6814997	1246867
MOLT-4	acalabrutinib	72	31.65	6985320	6814997	1246867
MOLT-4	acalabrutinib	72	100.07	7126660	6814997	1246867
MOLT-4	acalabrutinib	72	316.46	6771053	6814997	1246867
MOLT-4	acalabrutinib	72	1000.72	7857034	6814997	1246867
MOLT-4	acalabrutinib	72	3164.56	7359167	6814997	1246867
MOLT-4	acalabrutinib	72	10007.2	6301874	6814997	1246867
MOLT-4	acalabrutinib	72	31645.6	4601260	6814997	1246867
NCCIT	acalabrutinib	72	3.16	4718600	5095030	573360
NCCIT	acalabrutinib	72	10.01	4871320	5095030	573360
NCCIT	acalabrutinib	72	31.65	4760687	5095030	573360
NCCIT	acalabrutinib	72	100.07	5128620	5095030	573360
NCCIT	acalabrutinib	72	316.46	4935294	5095030	573360
NCCIT	acalabrutinib	72	1000.72	4797187	5095030	573360
NCCIT	acalabrutinib	72	3164.56	4709720	5095030	573360
NCCIT	acalabrutinib	72	10007.2	4601127	5095030	573360
NCCIT	acalabrutinib	72	31645.6	3028787	5095030	573360
NCI-H460	acalabrutinib	72	3.16	15249167	15011930	1039633
NCI-H460	acalabrutinib	72	10.01	14938107	15011930	1039633
NCI-H460	acalabrutinib	72	31.65	15328560	15011930	1039633
NCI-H460	acalabrutinib	72	100.07	15035247	15011930	1039633
NCI-H460	acalabrutinib	72	316.46	14879914	15011930	1039633
NCI-H460	acalabrutinib	72	1000.72	16447680	15011930	1039633
NCI-H460	acalabrutinib	72	3164.56	15212820	15011930	1039633
NCI-H460	acalabrutinib	72	10007.2	13334787	15011930	1039633
NCI-H460	acalabrutinib	72	31645.6	9740513	15011930	1039633
NCI-H661	acalabrutinib	72	3.16	2461874	2591483	960130
NCI-H661	acalabrutinib	72	10.01	2555027	2591483	960130
NCI-H661	acalabrutinib	72	31.65	2582027	2591483	960130
NCI-H661	acalabrutinib	72	100.07	2512480	2591483	960130
NCI-H661	acalabrutinib	72	316.46	2421147	2591483	960130
NCI-H661	acalabrutinib	72	1000.72	2210733	2591483	960130
NCI-H661	acalabrutinib	72	3164.56	2190440	2591483	960130
NCI-H661	acalabrutinib	72	10007.2	1775514	2591483	960130
NCI-H661	acalabrutinib	72	31645.6	1538527	2591483	960130
NCI-H82	acalabrutinib	72	3.16	6872080	7247843	603323
NCI-H82	acalabrutinib	72	10.01	7175134	7247843	603323
NCI-H82	acalabrutinib	72	31.65	7029694	7247843	603323
NCI-H82	acalabrutinib	72	100.07	6607973	7247843	603323
NCI-H82	acalabrutinib	72	316.46	6842880	7247843	603323
NCI-H82	acalabrutinib	72	1000.72	7282427	7247843	603323
NCI-H82	acalabrutinib	72	3164.56	6909693	7247843	603323
NCI-H82	acalabrutinib	72	10007.2	6893560	7247843	603323
NCI-H82	acalabrutinib	72	31645.6	5721533	7247843	603323
OVCAR-3	acalabrutinib	72	3.16	7076587	6223410	3106390
OVCAR-3	acalabrutinib	72	10.01	6627507	6223410	3106390
OVCAR-3	acalabrutinib	72	31.65	6678940	6223410	3106390
OVCAR-3	acalabrutinib	72	100.07	6500474	6223410	3106390
OVCAR-3	acalabrutinib	72	316.46	6443080	6223410	3106390
OVCAR-3	acalabrutinib	72	1000.72	6312134	6223410	3106390
OVCAR-3	acalabrutinib	72	3164.56	6098520	6223410	3106390
OVCAR-3	acalabrutinib	72	10007.2	5647860	6223410	3106390
OVCAR-3	acalabrutinib	72	31645.6	3950287	6223410	3106390
PA-1	acalabrutinib	72	3.16	669987	836797	158667
PA-1	acalabrutinib	72	10.01	1024367	836797	158667
PA-1	acalabrutinib	72	31.65	921673	836797	158667
PA-1	acalabrutinib	72	100.07	830727	836797	158667
PA-1	acalabrutinib	72	316.46	1032707	836797	158667
PA-1	acalabrutinib	72	1000.72	1004273	836797	158667
PA-1	acalabrutinib	72	3164.56	1000214	836797	158667
PA-1	acalabrutinib	72	10007.2	702707	836797	158667
PA-1	acalabrutinib	72	31645.6	503700	836797	158667
PC-3	acalabrutinib	72	3.16	8338753	7864347	1426547
PC-3	acalabrutinib	72	10	8052980	7864347	1426547
PC-3	acalabrutinib	72	31.62	8043040	7864347	1426547
PC-3	acalabrutinib	72	100	8343940	7864347	1426547
PC-3	acalabrutinib	72	316.23	8010247	7864347	1426547
PC-3	acalabrutinib	72	1000	7554780	7864347	1426547
PC-3	acalabrutinib	72	3162.28	7625000	7864347	1426547
PC-3	acalabrutinib	72	10000	7739407	7864347	1426547
PC-3	acalabrutinib	72	31622.8	5595360	7864347	1426547
PFSK-1	acalabrutinib	72	3.16	2755834	3000427	540567
PFSK-1	acalabrutinib	72	10.01	3190440	3000427	540567
PFSK-1	acalabrutinib	72	31.65	2914547	3000427	540567
PFSK-1	acalabrutinib	72	100.07	2970627	3000427	540567
PFSK-1	acalabrutinib	72	316.46	3035200	3000427	540567
PFSK-1	acalabrutinib	72	1000.72	2688540	3000427	540567
PFSK-1	acalabrutinib	72	3164.56	2806967	3000427	540567
PFSK-1	acalabrutinib	72	10007.2	2509140	3000427	540567
PFSK-1	acalabrutinib	72	31645.6	1746220	3000427	540567
RD	acalabrutinib	72	3.16	1295114	1305904	251337
RD	acalabrutinib	72	10.01	1274507	1305904	251337
RD	acalabrutinib	72	31.65	1498834	1305904	251337
RD	acalabrutinib	72	100.07	1492200	1305904	251337
RD	acalabrutinib	72	316.46	1319720	1305904	251337
RD	acalabrutinib	72	1000.72	1321500	1305904	251337
RD	acalabrutinib	72	3164.56	1499194	1305904	251337
RD	acalabrutinib	72	10007.2	1590513	1305904	251337
RD	acalabrutinib	72	31645.6	1274054	1305904	251337
RKO	acalabrutinib	72	3.16	2713454	2795457	200177
RKO	acalabrutinib	72	10.01	2753100	2795457	200177
RKO	acalabrutinib	72	31.65	2941787	2795457	200177
RKO	acalabrutinib	72	100.07	2752587	2795457	200177
RKO	acalabrutinib	72	316.46	2545920	2795457	200177
RKO	acalabrutinib	72	1000.72	3112707	2795457	200177
RKO	acalabrutinib	72	3164.56	2232087	2795457	200177
RKO	acalabrutinib	72	10007.2	2620553	2795457	200177
RKO	acalabrutinib	72	31645.6	1850987	2795457	200177
RL	acalabrutinib	72	3.16	8715247	7318734	700500
RL	acalabrutinib	72	10.01	8367587	7318734	700500
RL	acalabrutinib	72	31.65	7843454	7318734	700500
RL	acalabrutinib	72	100.07	7097667	7318734	700500
RL	acalabrutinib	72	316.46	7893707	7318734	700500
RL	acalabrutinib	72	1000.72	7701687	7318734	700500
RL	acalabrutinib	72	3164.56	8361047	7318734	700500
RL	acalabrutinib	72	10007.2	7941547	7318734	700500
RL	acalabrutinib	72	31645.6	5626614	7318734	700500
RL95-2	acalabrutinib	72	3.16	2246387	2338533	627817
RL95-2	acalabrutinib	72	10.01	2392960	2338533	627817
RL95-2	acalabrutinib	72	31.65	2203287	2338533	627817
RL95-2	acalabrutinib	72	100.07	2311074	2338533	627817
RL95-2	acalabrutinib	72	316.46	2200487	2338533	627817
RL95-2	acalabrutinib	72	1000.72	2257147	2338533	627817
RL95-2	acalabrutinib	72	3164.56	2020307	2338533	627817
RL95-2	acalabrutinib	72	10007.2	1865440	2338533	627817
RL95-2	acalabrutinib	72	31645.6	1465253	2338533	627817
RPMI-7951	acalabrutinib	72	3.16	2523740	2596723	342837
RPMI-7951	acalabrutinib	72	10.01	2823154	2596723	342837
RPMI-7951	acalabrutinib	72	31.65	2519260	2596723	342837
RPMI-7951	acalabrutinib	72	100.07	2538480	2596723	342837
RPMI-7951	acalabrutinib	72	316.46	2700554	2596723	342837
RPMI-7951	acalabrutinib	72	1000.72	2319640	2596723	342837
RPMI-7951	acalabrutinib	72	3164.56	2438040	2596723	342837
RPMI-7951	acalabrutinib	72	10007.2	2195414	2596723	342837
RPMI-7951	acalabrutinib	72	31645.6	1800973	2596723	342837
RS4-11	acalabrutinib	72	3.16	1983727	1998820	741250
RS4-11	acalabrutinib	72	10.01	2103833	1998820	741250
RS4-11	acalabrutinib	72	31.65	2004173	1998820	741250
RS4-11	acalabrutinib	72	100.07	2029040	1998820	741250
RS4-11	acalabrutinib	72	316.46	2037847	1998820	741250
RS4-11	acalabrutinib	72	1000.72	1916987	1998820	741250
RS4-11	acalabrutinib	72	3164.56	1966913	1998820	741250
RS4-11	acalabrutinib	72	10007.2	1885894	1998820	741250
RS4-11	acalabrutinib	72	31645.6	1556287	1998820	741250
RT4	acalabrutinib	72	3.16	6958387	7255267	2014467
RT4	acalabrutinib	72	10.01	6993247	7255267	2014467
RT4	acalabrutinib	72	31.65	7258447	7255267	2014467
RT4	acalabrutinib	72	100.07	6993300	7255267	2014467
RT4	acalabrutinib	72	316.46	6889447	7255267	2014467
RT4	acalabrutinib	72	1000.72	6586907	7255267	2014467
RT4	acalabrutinib	72	3164.56	6331574	7255267	2014467
RT4	acalabrutinib	72	10007.2	5490000	7255267	2014467
RT4	acalabrutinib	72	31645.6	4422647	7255267	2014467
SHP-77	acalabrutinib	72	3.16	3183620	3217800	739694
SHP-77	acalabrutinib	72	10.01	3168660	3217800	739694
SHP-77	acalabrutinib	72	31.65	3084380	3217800	739694
SHP-77	acalabrutinib	72	100.07	3038507	3217800	739694
SHP-77	acalabrutinib	72	316.46	3138753	3217800	739694
SHP-77	acalabrutinib	72	1000.72	3056060	3217800	739694
SHP-77	acalabrutinib	72	3164.56	3143567	3217800	739694
SHP-77	acalabrutinib	72	10007.2	3519034	3217800	739694
SHP-77	acalabrutinib	72	31645.6	3218247	3217800	739694
SJCRH30	acalabrutinib	72	3.16	3112334	3034370	566590
SJCRH30	acalabrutinib	72	10.01	3135654	3034370	566590
SJCRH30	acalabrutinib	72	31.65	3126014	3034370	566590
SJCRH30	acalabrutinib	72	100.07	2855414	3034370	566590
SJCRH30	acalabrutinib	72	316.46	2855640	3034370	566590
SJCRH30	acalabrutinib	72	1000.72	2631640	3034370	566590
SJCRH30	acalabrutinib	72	3164.56	2918220	3034370	566590
SJCRH30	acalabrutinib	72	10007.2	2965460	3034370	566590
SJCRH30	acalabrutinib	72	31645.6	2797400	3034370	566590
SK-N-AS	acalabrutinib	72	3.16	1679660	1715857	436070
SK-N-AS	acalabrutinib	72	10.01	1848000	1715857	436070
SK-N-AS	acalabrutinib	72	31.65	1617767	1715857	436070
SK-N-AS	acalabrutinib	72	100.07	1623987	1715857	436070
SK-N-AS	acalabrutinib	72	316.46	1758640	1715857	436070
SK-N-AS	acalabrutinib	72	1000.72	1774140	1715857	436070
SK-N-AS	acalabrutinib	72	3164.56	1790467	1715857	436070
SK-N-AS	acalabrutinib	72	10007.2	1768647	1715857	436070
SK-N-AS	acalabrutinib	72	31645.6	1506554	1715857	436070
SK-N-FI	acalabrutinib	72	3.16	1321287	1373797	470253
SK-N-FI	acalabrutinib	72	10.01	1291387	1373797	470253
SK-N-FI	acalabrutinib	72	31.65	1311140	1373797	470253
SK-N-FI	acalabrutinib	72	100.07	1333447	1373797	470253
SK-N-FI	acalabrutinib	72	316.46	1337194	1373797	470253
SK-N-FI	acalabrutinib	72	1000.72	1299840	1373797	470253
SK-N-FI	acalabrutinib	72	3164.56	1372200	1373797	470253
SK-N-FI	acalabrutinib	72	10007.2	1346407	1373797	470253
SK-N-FI	acalabrutinib	72	31645.6	1179534	1373797	470253
SNU-5	acalabrutinib	72	3.16	3661594	3522227	1068287
SNU-5	acalabrutinib	72	10.01	3858494	3522227	1068287
SNU-5	acalabrutinib	72	31.65	3754867	3522227	1068287
SNU-5	acalabrutinib	72	100.07	3459953	3522227	1068287
SNU-5	acalabrutinib	72	316.46	3558474	3522227	1068287
SNU-5	acalabrutinib	72	1000.72	3646073	3522227	1068287
SNU-5	acalabrutinib	72	3164.56	3680460	3522227	1068287
SNU-5	acalabrutinib	72	10007.2	3683167	3522227	1068287
SNU-5	acalabrutinib	72	31645.6	2851087	3522227	1068287
SNU-C2B	acalabrutinib	72	3.16	892087	900460	396170
SNU-C2B	acalabrutinib	72	10.01	1044960	900460	396170
SNU-C2B	acalabrutinib	72	31.65	992594	900460	396170
SNU-C2B	acalabrutinib	72	100.07	841900	900460	396170
SNU-C2B	acalabrutinib	72	316.46	843514	900460	396170
SNU-C2B	acalabrutinib	72	1000.72	862027	900460	396170
SNU-C2B	acalabrutinib	72	3164.56	870200	900460	396170
SNU-C2B	acalabrutinib	72	10007.2	818527	900460	396170
SNU-C2B	acalabrutinib	72	31645.6	814147	900460	396170
SR	acalabrutinib	72	3.16	2214734	2107177	418177
SR	acalabrutinib	72	10.01	2197914	2107177	418177
SR	acalabrutinib	72	31.65	2189014	2107177	418177
SR	acalabrutinib	72	100.07	2449474	2107177	418177
SR	acalabrutinib	72	316.46	2149500	2107177	418177
SR	acalabrutinib	72	1000.72	2115587	2107177	418177
SR	acalabrutinib	72	3164.56	1828047	2107177	418177
SR	acalabrutinib	72	10007.2	1381207	2107177	418177
SR	acalabrutinib	72	31645.6	684714	2107177	418177
SU-DHL-1	acalabrutinib	72	3.16	6743207	6969927	457357
SU-DHL-1	acalabrutinib	72	10.01	6272807	6969927	457357
SU-DHL-1	acalabrutinib	72	31.65	6072800	6969927	457357
SU-DHL-1	acalabrutinib	72	100.07	6874947	6969927	457357
SU-DHL-1	acalabrutinib	72	316.46	6596640	6969927	457357
SU-DHL-1	acalabrutinib	72	1000.72	6746160	6969927	457357
SU-DHL-1	acalabrutinib	72	3164.56	6701160	6969927	457357
SU-DHL-1	acalabrutinib	72	10007.2	6196534	6969927	457357
SU-DHL-1	acalabrutinib	72	31645.6	5142427	6969927	457357
SU-DHL-5	acalabrutinib	72	1	10579554	10778970	836930
SU-DHL-5	acalabrutinib	72	3.16	11374907	10778970	836930
SU-DHL-5	acalabrutinib	72	10	10560440	10778970	836930
SU-DHL-5	acalabrutinib	72	31.62	10504340	10778970	836930
SU-DHL-5	acalabrutinib	72	100	10306047	10778970	836930
SU-DHL-5	acalabrutinib	72	316.23	10564214	10778970	836930
SU-DHL-5	acalabrutinib	72	1000	10175520	10778970	836930
SU-DHL-5	acalabrutinib	72	3162.28	9483987	10778970	836930
SU-DHL-5	acalabrutinib	72	10000	9298614	10778970	836930
SU-DHL-6	acalabrutinib	72	0.32	7044934	6687034	1029150
SU-DHL-6	acalabrutinib	72	1	6767700	6687034	1029150
SU-DHL-6	acalabrutinib	72	3.16	6055180	6687034	1029150
SU-DHL-6	acalabrutinib	72	10	5793180	6687034	1029150
SU-DHL-6	acalabrutinib	72	31.62	5331767	6687034	1029150
SU-DHL-6	acalabrutinib	72	100	5251013	6687034	1029150
SU-DHL-6	acalabrutinib	72	316.23	4925787	6687034	1029150
SU-DHL-6	acalabrutinib	72	1000	4607527	6687034	1029150
SU-DHL-6	acalabrutinib	72	3162.28	3862693	6687034	1029150
SUP-T1	acalabrutinib	72	3.16	1831387	1985817	329934
SUP-T1	acalabrutinib	72	10.01	1832740	1985817	329934
SUP-T1	acalabrutinib	72	31.65	1821160	1985817	329934
SUP-T1	acalabrutinib	72	100.07	1983367	1985817	329934
SUP-T1	acalabrutinib	72	316.46	1730600	1985817	329934
SUP-T1	acalabrutinib	72	1000.72	1803134	1985817	329934
SUP-T1	acalabrutinib	72	3164.56	1740000	1985817	329934
SUP-T1	acalabrutinib	72	10007.2	1647934	1985817	329934
SUP-T1	acalabrutinib	72	31645.6	1412447	1985817	329934
SW48	acalabrutinib	72	3.16	5782427	5780980	1122920
SW48	acalabrutinib	72	10.01	5519080	5780980	1122920
SW48	acalabrutinib	72	31.65	5426600	5780980	1122920
SW48	acalabrutinib	72	100.07	5765140	5780980	1122920
SW48	acalabrutinib	72	316.46	5037287	5780980	1122920
SW48	acalabrutinib	72	1000.72	4947934	5780980	1122920
SW48	acalabrutinib	72	3164.56	3668594	5780980	1122920
SW48	acalabrutinib	72	10007.2	3353800	5780980	1122920
SW48	acalabrutinib	72	31645.6	2392073	5780980	1122920
SW480	acalabrutinib	72	3.16	4034567	3978337	686990
SW480	acalabrutinib	72	10.01	4102794	3978337	686990
SW480	acalabrutinib	72	31.65	3918574	3978337	686990
SW480	acalabrutinib	72	100.07	3917720	3978337	686990
SW480	acalabrutinib	72	316.46	4246927	3978337	686990
SW480	acalabrutinib	72	1000.72	3976500	3978337	686990
SW480	acalabrutinib	72	3164.56	4167940	3978337	686990
SW480	acalabrutinib	72	10007.2	4001927	3978337	686990
SW480	acalabrutinib	72	31645.6	3776800	3978337	686990
SW620	acalabrutinib	72	3.16	7060280	7222394	739603
SW620	acalabrutinib	72	10.01	7097647	7222394	739603
SW620	acalabrutinib	72	31.65	6898067	7222394	739603
SW620	acalabrutinib	72	100.07	7186714	7222394	739603
SW620	acalabrutinib	72	316.46	7467633	7222394	739603
SW620	acalabrutinib	72	1000.72	7497187	7222394	739603
SW620	acalabrutinib	72	3164.56	7724494	7222394	739603
SW620	acalabrutinib	72	10007.2	8496227	7222394	739603
SW620	acalabrutinib	72	31645.6	9452227	7222394	739603
SW626	acalabrutinib	72	3.16	1943940	1782030	685480
SW626	acalabrutinib	72	10.01	1982220	1782030	685480
SW626	acalabrutinib	72	31.65	1820794	1782030	685480
SW626	acalabrutinib	72	100.07	1766394	1782030	685480
SW626	acalabrutinib	72	316.46	1918707	1782030	685480
SW626	acalabrutinib	72	1000.72	1760693	1782030	685480
SW626	acalabrutinib	72	3164.56	1894500	1782030	685480
SW626	acalabrutinib	72	10007.2	1724114	1782030	685480
SW626	acalabrutinib	72	31645.6	1651020	1782030	685480
SW837	acalabrutinib	72	3.16	3584960	3177870	855730
SW837	acalabrutinib	72	10.01	3382007	3177870	855730
SW837	acalabrutinib	72	31.65	3402367	3177870	855730
SW837	acalabrutinib	72	100.07	3583954	3177870	855730
SW837	acalabrutinib	72	316.46	3564114	3177870	855730
SW837	acalabrutinib	72	1000.72	3498707	3177870	855730
SW837	acalabrutinib	72	3164.56	3452967	3177870	855730
SW837	acalabrutinib	72	10007.2	3296834	3177870	855730
SW837	acalabrutinib	72	31645.6	3119053	3177870	855730
SW872	acalabrutinib	72	3.16	5158567	5128870	802177
SW872	acalabrutinib	72	10.01	4686627	5128870	802177
SW872	acalabrutinib	72	31.65	4796693	5128870	802177
SW872	acalabrutinib	72	100.07	4669147	5128870	802177
SW872	acalabrutinib	72	316.46	5059893	5128870	802177
SW872	acalabrutinib	72	1000.72	5154080	5128870	802177
SW872	acalabrutinib	72	3164.56	5120807	5128870	802177
SW872	acalabrutinib	72	10007.2	4579447	5128870	802177
SW872	acalabrutinib	72	31645.6	3430040	5128870	802177
SW900	acalabrutinib	72	3.16	5299880	5499843	893747
SW900	acalabrutinib	72	10.01	5917467	5499843	893747
SW900	acalabrutinib	72	31.65	5919027	5499843	893747
SW900	acalabrutinib	72	100.07	5559227	5499843	893747
SW900	acalabrutinib	72	316.46	5389800	5499843	893747
SW900	acalabrutinib	72	1000.72	5930440	5499843	893747
SW900	acalabrutinib	72	3164.56	5488247	5499843	893747
SW900	acalabrutinib	72	10007.2	5175187	5499843	893747
SW900	acalabrutinib	72	31645.6	3879760	5499843	893747
SW948	acalabrutinib	72	3.16	2595693	2473197	481200
SW948	acalabrutinib	72	10.01	2588467	2473197	481200
SW948	acalabrutinib	72	31.65	2558780	2473197	481200
SW948	acalabrutinib	72	100.07	2455147	2473197	481200
SW948	acalabrutinib	72	316.46	2499107	2473197	481200
SW948	acalabrutinib	72	1000.72	2376220	2473197	481200
SW948	acalabrutinib	72	3164.56	2478227	2473197	481200
SW948	acalabrutinib	72	10007.2	2603387	2473197	481200
SW948	acalabrutinib	72	31645.6	2464233	2473197	481200
SW982	acalabrutinib	72	3.16	3949260	3850493	583280
SW982	acalabrutinib	72	10.01	3918134	3850493	583280
SW982	acalabrutinib	72	31.65	4110014	3850493	583280
SW982	acalabrutinib	72	100.07	3945687	3850493	583280
SW982	acalabrutinib	72	316.46	3911413	3850493	583280
SW982	acalabrutinib	72	1000.72	3975500	3850493	583280
SW982	acalabrutinib	72	3164.56	3826207	3850493	583280
SW982	acalabrutinib	72	10007.2	3079893	3850493	583280
SW982	acalabrutinib	72	31645.6	2155454	3850493	583280
T24	acalabrutinib	72	3.16	5223267	5098493	565823
T24	acalabrutinib	72	10.01	5774447	5098493	565823
T24	acalabrutinib	72	31.65	5226187	5098493	565823
T24	acalabrutinib	72	100.07	4835480	5098493	565823
T24	acalabrutinib	72	316.46	5250380	5098493	565823
T24	acalabrutinib	72	1000.72	4847727	5098493	565823
T24	acalabrutinib	72	3164.56	5707300	5098493	565823
T24	acalabrutinib	72	10007.2	5257973	5098493	565823
T24	acalabrutinib	72	31645.6	4211987	5098493	565823
T98G	acalabrutinib	72	3.16	5800280	6013867	796147
T98G	acalabrutinib	72	10.01	5829607	6013867	796147
T98G	acalabrutinib	72	31.65	5700294	6013867	796147
T98G	acalabrutinib	72	100.07	6214680	6013867	796147
T98G	acalabrutinib	72	316.46	6056800	6013867	796147
T98G	acalabrutinib	72	1000.72	5371667	6013867	796147
T98G	acalabrutinib	72	3164.56	5521653	6013867	796147
T98G	acalabrutinib	72	10007.2	5789227	6013867	796147
T98G	acalabrutinib	72	31645.6	5196947	6013867	796147
TCCSUP	acalabrutinib	72	3.16	1381447	1232167	315247
TCCSUP	acalabrutinib	72	10.01	1446840	1232167	315247
TCCSUP	acalabrutinib	72	31.65	1332640	1232167	315247
TCCSUP	acalabrutinib	72	100.07	1373400	1232167	315247
TCCSUP	acalabrutinib	72	316.46	1300680	1232167	315247
TCCSUP	acalabrutinib	72	1000.72	1247580	1232167	315247
TCCSUP	acalabrutinib	72	3164.56	1309814	1232167	315247
TCCSUP	acalabrutinib	72	10007.2	1196314	1232167	315247
TCCSUP	acalabrutinib	72	31645.6	1176234	1232167	315247
THP-1	acalabrutinib	72	3.16	8471127	8580773	2814603
THP-1	acalabrutinib	72	10.01	8566654	8580773	2814603
THP-1	acalabrutinib	72	31.65	8616534	8580773	2814603
THP-1	acalabrutinib	72	100.07	8330447	8580773	2814603
THP-1	acalabrutinib	72	316.46	8375180	8580773	2814603
THP-1	acalabrutinib	72	1000.72	8390040	8580773	2814603
THP-1	acalabrutinib	72	3164.56	9481320	8580773	2814603
THP-1	acalabrutinib	72	10007.2	9249707	8580773	2814603
THP-1	acalabrutinib	72	31645.6	8748714	8580773	2814603
TT	acalabrutinib	72	3.16	1990474	1799893	1228867
TT	acalabrutinib	72	10.01	1867874	1799893	1228867
TT	acalabrutinib	72	31.65	1850607	1799893	1228867
TT	acalabrutinib	72	100.07	1924887	1799893	1228867
TT	acalabrutinib	72	316.46	1778474	1799893	1228867
TT	acalabrutinib	72	1000.72	1869994	1799893	1228867
TT	acalabrutinib	72	3164.56	1727034	1799893	1228867
TT	acalabrutinib	72	10007.2	1497320	1799893	1228867
TT	acalabrutinib	72	31645.6	1194267	1799893	1228867
U-118 MG	acalabrutinib	72	3.16	2078460	2067767	373830
U-118 MG	acalabrutinib	72	10.01	2077127	2067767	373830
U-118 MG	acalabrutinib	72	31.65	2256507	2067767	373830
U-118 MG	acalabrutinib	72	100.07	1895207	2067767	373830
U-118 MG	acalabrutinib	72	316.46	2123473	2067767	373830
U-118 MG	acalabrutinib	72	1000.72	2014247	2067767	373830
U-118 MG	acalabrutinib	72	3164.56	1993987	2067767	373830
U-118 MG	acalabrutinib	72	10007.2	2139760	2067767	373830
U-118 MG	acalabrutinib	72	31645.6	1831554	2067767	373830
U-2 OS	acalabrutinib	72	3.16	2215280	2173930	347027
U-2 OS	acalabrutinib	72	10.01	2061854	2173930	347027
U-2 OS	acalabrutinib	72	31.65	2137560	2173930	347027
U-2 OS	acalabrutinib	72	100.07	2068767	2173930	347027
U-2 OS	acalabrutinib	72	316.46	2327387	2173930	347027
U-2 OS	acalabrutinib	72	1000.72	2058153	2173930	347027
U-2 OS	acalabrutinib	72	3164.56	2090847	2173930	347027
U-2 OS	acalabrutinib	72	10007.2	2073313	2173930	347027
U-2 OS	acalabrutinib	72	31645.6	1594100	2173930	347027
U-87 MG	acalabrutinib	72	3.16	3332874	3219430	613930
U-87 MG	acalabrutinib	72	10.01	3329294	3219430	613930
U-87 MG	acalabrutinib	72	31.65	3200153	3219430	613930
U-87 MG	acalabrutinib	72	100.07	3418354	3219430	613930
U-87 MG	acalabrutinib	72	316.46	3349447	3219430	613930
U-87 MG	acalabrutinib	72	1000.72	3216600	3219430	613930
U-87 MG	acalabrutinib	72	3164.56	3172080	3219430	613930
U-87 MG	acalabrutinib	72	10007.2	3370020	3219430	613930
U-87 MG	acalabrutinib	72	31645.6	3199427	3219430	613930
VA-ES-BJ	acalabrutinib	72	3.16	2669633	2746270	640893
VA-ES-BJ	acalabrutinib	72	10.01	2440300	2746270	640893
VA-ES-BJ	acalabrutinib	72	31.65	2569114	2746270	640893
VA-ES-BJ	acalabrutinib	72	100.07	2851774	2746270	640893
VA-ES-BJ	acalabrutinib	72	316.46	2489900	2746270	640893
VA-ES-BJ	acalabrutinib	72	1000.72	2643493	2746270	640893
VA-ES-BJ	acalabrutinib	72	3164.56	2590567	2746270	640893
VA-ES-BJ	acalabrutinib	72	10007.2	1943907	2746270	640893
VA-ES-BJ	acalabrutinib	72	31645.6	1392147	2746270	640893
5637	alectinib	72	1	3160693	2706584	460517
5637	alectinib	72	3.16	2934740	2706584	460517
5637	alectinib	72	10	2833274	2706584	460517
5637	alectinib	72	31.62	2679367	2706584	460517
5637	alectinib	72	100	3126154	2706584	460517
5637	alectinib	72	316.23	2890707	2706584	460517
5637	alectinib	72	1000	2763587	2706584	460517
5637	alectinib	72	3162.28	1931187	2706584	460517
5637	alectinib	72	10000	1557940	2706584	460517
769-P	alectinib	72	1	3905720	3977950	550737
769-P	alectinib	72	3.16	4045473	3977950	550737
769-P	alectinib	72	10	3629720	3977950	550737
769-P	alectinib	72	31.62	3690007	3977950	550737
769-P	alectinib	72	100	4078287	3977950	550737
769-P	alectinib	72	316.23	4276514	3977950	550737
769-P	alectinib	72	1000	3909880	3977950	550737
769-P	alectinib	72	3162.28	3839960	3977950	550737
769-P	alectinib	72	10000	2366327	3977950	550737
786-O	alectinib	72	1	5423967	5668290	556720
786-O	alectinib	72	3.16	5231467	5668290	556720
786-O	alectinib	72	10	5742234	5668290	556720
786-O	alectinib	72	31.62	5699540	5668290	556720
786-O	alectinib	72	100	5551180	5668290	556720
786-O	alectinib	72	316.23	5095707	5668290	556720
786-O	alectinib	72	1000	5023214	5668290	556720
786-O	alectinib	72	3162.28	5069494	5668290	556720
786-O	alectinib	72	10000	3483174	5668290	556720
A-172	alectinib	72	1	1899627	1910004	547207
A-172	alectinib	72	3.16	1807113	1910004	547207
A-172	alectinib	72	10	1888020	1910004	547207
A-172	alectinib	72	31.62	1933687	1910004	547207
A-172	alectinib	72	100	2027634	1910004	547207
A-172	alectinib	72	316.23	1951320	1910004	547207
A-172	alectinib	72	1000	1964114	1910004	547207
A-172	alectinib	72	3162.28	2105927	1910004	547207
A-172	alectinib	72	10000	1755140	1910004	547207
A-204	alectinib	72	1	1232154	1170457	336637
A-204	alectinib	72	3.16	1146040	1170457	336637
A-204	alectinib	72	10	1221787	1170457	336637
A-204	alectinib	72	31.62	1440420	1170457	336637
A-204	alectinib	72	100	1128487	1170457	336637
A-204	alectinib	72	316.23	1290740	1170457	336637
A-204	alectinib	72	1000	987174	1170457	336637
A-204	alectinib	72	3162.28	1110767	1170457	336637
A-204	alectinib	72	10000	766834	1170457	336637
A-427	alectinib	72	1	2123160	1836300	247477
A-427	alectinib	72	3.16	1672180	1836300	247477
A-427	alectinib	72	10	1917354	1836300	247477
A-427	alectinib	72	31.62	2012487	1836300	247477
A-427	alectinib	72	100	1913507	1836300	247477
A-427	alectinib	72	316.23	2123814	1836300	247477
A-427	alectinib	72	1000	2005440	1836300	247477
A-427	alectinib	72	3162.28	1852734	1836300	247477
[truncated: 14,527 more rows]

## Sheet: TableS3c_raw_counts_ref_cmpds
Uitdehaag et al. (2018) Supplementary Table S3c. Cell panel data of the reference kinase inhibitors. Relative Luminescence Units (RLU) as determined by proliferation assays, for details see www.ntrc.nl. Data as used for fitting of dose-response curves.
Incubation time is in hours. Concentration is in nM, except for herceptin, which is in μg/mL. Cell_counts are the average RLU of the tested compound concentration in duplo. Cell_count_control are the average RLU of the DMSO control in quadruplo. Cell_count_time0 are the average RLU at timepoint 0 in quadruplo.
cell_line	compound	incubation_time	concentration	cell_count	cell_count_ctrl	cell_count_time0
5637	afatinib	72	3.16	2615047	2573940	568610
5637	afatinib	72	10.01	2191374	2573940	568610
5637	afatinib	72	31.65	1625560	2573940	568610
5637	afatinib	72	100.07	1230140	2573940	568610
5637	afatinib	72	316.46	1174094	2573940	568610
5637	afatinib	72	1000.72	897914	2573940	568610
5637	afatinib	72	3164.56	318727	2573940	568610
5637	afatinib	72	10007.2	1980	2573940	568610
5637	afatinib	72	31645.6	26147	2573940	568610
769-P	afatinib	72	3.16	6456327	6191437	990520
769-P	afatinib	72	10.01	5881620	6191437	990520
769-P	afatinib	72	31.65	5347527	6191437	990520
769-P	afatinib	72	100.07	4813227	6191437	990520
769-P	afatinib	72	316.46	4647520	6191437	990520
769-P	afatinib	72	1000.72	4112420	6191437	990520
769-P	afatinib	72	3164.56	2168193	6191437	990520
769-P	afatinib	72	10007.2	278240	6191437	990520
769-P	afatinib	72	31645.6	4420	6191437	990520
786-O	afatinib	72	3.16	5298974	4894550	622200
786-O	afatinib	72	10.01	4609560	4894550	622200
786-O	afatinib	72	31.65	4045067	4894550	622200
786-O	afatinib	72	100.07	4665620	4894550	622200
786-O	afatinib	72	316.46	4054607	4894550	622200
786-O	afatinib	72	1000.72	3525640	4894550	622200
786-O	afatinib	72	3164.56	1910227	4894550	622200
786-O	afatinib	72	10007.2	11273	4894550	622200
786-O	afatinib	72	31645.6	8907	4894550	622200
A-172	afatinib	72	3.16	1578120	1709190	568370
A-172	afatinib	72	10.01	1471700	1709190	568370
A-172	afatinib	72	31.65	1515274	1709190	568370
A-172	afatinib	72	100.07	1531887	1709190	568370
A-172	afatinib	72	316.46	1446340	1709190	568370
A-172	afatinib	72	1000.72	1233854	1709190	568370
A-172	afatinib	72	3164.56	697420	1709190	568370
A-172	afatinib	72	10007.2	5374	1709190	568370
A-172	afatinib	72	31645.6	287	1709190	568370
A-204	afatinib	72	3.16	784820	867353	245143
A-204	afatinib	72	10.01	795140	867353	245143
A-204	afatinib	72	31.65	936433	867353	245143
A-204	afatinib	72	100.07	835593	867353	245143
A-204	afatinib	72	316.46	717360	867353	245143
A-204	afatinib	72	1000.72	563013	867353	245143
A-204	afatinib	72	3164.56	258547	867353	245143
A-204	afatinib	72	10007.2	40280	867353	245143
A-204	afatinib	72	31645.6	8700	867353	245143
A375	afatinib	72	3.16	5163320	5522360	684880
A375	afatinib	72	10.01	5280300	5522360	684880
A375	afatinib	72	31.65	5463774	5522360	684880
A375	afatinib	72	100.07	5517600	5522360	684880
A375	afatinib	72	316.46	5497013	5522360	684880
A375	afatinib	72	1000.72	4622654	5522360	684880
A375	afatinib	72	3164.56	2023093	5522360	684880
A375	afatinib	72	10007.2	120687	5522360	684880
A375	afatinib	72	31645.6	594	5522360	684880
A388	afatinib	72	0.1	2037374	2081007	439207
A388	afatinib	72	0.32	1817567	2081007	439207
A388	afatinib	72	1	1917007	2081007	439207
A388	afatinib	72	3.16	1829320	2081007	439207
A388	afatinib	72	10.01	1971900	2081007	439207
A388	afatinib	72	31.65	1793373	2081007	439207
A388	afatinib	72	100.07	1642227	2081007	439207
A388	afatinib	72	316.46	1544414	2081007	439207
A388	afatinib	72	1000.72	1247940	2081007	439207
A-427	afatinib	72	3.16	1778754	1756087	239560
A-427	afatinib	72	10.01	1761814	1756087	239560
A-427	afatinib	72	31.65	1863774	1756087	239560
A-427	afatinib	72	100.07	1589747	1756087	239560
A-427	afatinib	72	316.46	1641247	1756087	239560
A-427	afatinib	72	1000.72	1580674	1756087	239560
A-427	afatinib	72	3164.56	748120	1756087	239560
A-427	afatinib	72	10007.2	17660	1756087	239560
A-427	afatinib	72	31645.6	194	1756087	239560
A-498	afatinib	72	0.1	1789880	1784700	582623
A-498	afatinib	72	0.32	1479920	1784700	582623
A-498	afatinib	72	1	1344760	1784700	582623
A-498	afatinib	72	3.16	1363280	1784700	582623
A-498	afatinib	72	10.01	1211207	1784700	582623
A-498	afatinib	72	31.65	1083287	1784700	582623
A-498	afatinib	72	100.07	443600	1784700	582623
A-498	afatinib	72	316.46	46873	1784700	582623
A-498	afatinib	72	1000.72	374	1784700	582623
A-549	afatinib	72	3.16	5266127	5408760	788934
A-549	afatinib	72	10.01	4907627	5408760	788934
A-549	afatinib	72	31.65	4834360	5408760	788934
A-549	afatinib	72	100.07	4577767	5408760	788934
A-549	afatinib	72	316.46	4513267	5408760	788934
A-549	afatinib	72	1000.72	4050893	5408760	788934
A-549	afatinib	72	3164.56	3196807	5408760	788934
A-549	afatinib	72	10007.2	939100	5408760	788934
A-549	afatinib	72	31645.6	3274	5408760	788934
A-704	afatinib	72	3.16	4822667	4850087	2339024
A-704	afatinib	72	10.01	4616607	4850087	2339024
A-704	afatinib	72	31.65	4656560	4850087	2339024
A-704	afatinib	72	100.07	4563434	4850087	2339024
A-704	afatinib	72	316.46	4340714	4850087	2339024
A-704	afatinib	72	1000.72	3971847	4850087	2339024
A-704	afatinib	72	3164.56	3274967	4850087	2339024
A-704	afatinib	72	10007.2	875207	4850087	2339024
A-704	afatinib	72	31645.6	4080	4850087	2339024
ACHN	afatinib	72	0.1	9744480	9515880	1041243
ACHN	afatinib	72	0.32	9877994	9515880	1041243
ACHN	afatinib	72	1	8936440	9515880	1041243
ACHN	afatinib	72	3.16	8244493	9515880	1041243
ACHN	afatinib	72	10.01	7292280	9515880	1041243
ACHN	afatinib	72	31.65	6638453	9515880	1041243
ACHN	afatinib	72	100.07	6227147	9515880	1041243
ACHN	afatinib	72	316.46	6025834	9515880	1041243
ACHN	afatinib	72	1000.72	5471160	9515880	1041243
AN3 CA	afatinib	72	3.16	790407	749053	176263
AN3 CA	afatinib	72	10.01	730707	749053	176263
AN3 CA	afatinib	72	31.65	712480	749053	176263
AN3 CA	afatinib	72	100.07	788707	749053	176263
AN3 CA	afatinib	72	316.46	753407	749053	176263
AN3 CA	afatinib	72	1000.72	657567	749053	176263
AN3 CA	afatinib	72	3164.56	394134	749053	176263
AN3 CA	afatinib	72	10007.2	22294	749053	176263
AN3 CA	afatinib	72	31645.6	367	749053	176263
AsPC-1	afatinib	72	3.16	4368600	4189317	1227537
AsPC-1	afatinib	72	10.01	4685227	4189317	1227537
AsPC-1	afatinib	72	31.65	4081973	4189317	1227537
AsPC-1	afatinib	72	100.07	3717840	4189317	1227537
AsPC-1	afatinib	72	316.46	3431707	4189317	1227537
AsPC-1	afatinib	72	1000.72	2958354	4189317	1227537
AsPC-1	afatinib	72	3164.56	2452587	4189317	1227537
AsPC-1	afatinib	72	10007.2	1439480	4189317	1227537
AsPC-1	afatinib	72	31645.6	17700	4189317	1227537
AU-565	afatinib	72	3.16	3419740	3887730	1469903
AU-565	afatinib	72	10.01	3108440	3887730	1469903
AU-565	afatinib	72	31.65	1825300	3887730	1469903
AU-565	afatinib	72	100.07	775034	3887730	1469903
AU-565	afatinib	72	316.46	640200	3887730	1469903
AU-565	afatinib	72	1000.72	585033	3887730	1469903
AU-565	afatinib	72	3164.56	483793	3887730	1469903
AU-565	afatinib	72	10007.2	774980	3887730	1469903
AU-565	afatinib	72	31645.6	19693	3887730	1469903
BT-20	afatinib	72	3.16	3452200	3474270	1483900
BT-20	afatinib	72	10.01	3335620	3474270	1483900
BT-20	afatinib	72	31.65	3065740	3474270	1483900
BT-20	afatinib	72	100.07	3065600	3474270	1483900
BT-20	afatinib	72	316.46	2853820	3474270	1483900
BT-20	afatinib	72	1000.72	3094294	3474270	1483900
BT-20	afatinib	72	3164.56	2174574	3474270	1483900
BT-20	afatinib	72	10007.2	230754	3474270	1483900
BT-20	afatinib	72	31645.6	49573	3474270	1483900
BT-549	afatinib	72	3.16	3364494	2913734	578957
BT-549	afatinib	72	10.01	3085000	2913734	578957
BT-549	afatinib	72	31.65	2785367	2913734	578957
BT-549	afatinib	72	100.07	2811413	2913734	578957
BT-549	afatinib	72	316.46	2718727	2913734	578957
BT-549	afatinib	72	1000.72	2044973	2913734	578957
BT-549	afatinib	72	3164.56	1127334	2913734	578957
BT-549	afatinib	72	10007.2	235607	2913734	578957
BT-549	afatinib	72	31645.6	1327	2913734	578957
BxPC-3	afatinib	72	3.16	1978760	2084820	640970
BxPC-3	afatinib	72	10.01	1850107	2084820	640970
BxPC-3	afatinib	72	31.65	1673373	2084820	640970
BxPC-3	afatinib	72	100.07	1352854	2084820	640970
BxPC-3	afatinib	72	316.46	1478427	2084820	640970
BxPC-3	afatinib	72	1000.72	1433187	2084820	640970
BxPC-3	afatinib	72	3164.56	1213020	2084820	640970
BxPC-3	afatinib	72	10007.2	31607	2084820	640970
BxPC-3	afatinib	72	31645.6	753	2084820	640970
C-33 A	afatinib	72	3.16	4172447	4235597	624387
C-33 A	afatinib	72	10.01	3344500	4235597	624387
C-33 A	afatinib	72	31.65	2945293	4235597	624387
C-33 A	afatinib	72	100.07	1313733	4235597	624387
C-33 A	afatinib	72	316.46	1235334	4235597	624387
C-33 A	afatinib	72	1000.72	1139820	4235597	624387
C-33 A	afatinib	72	3164.56	1013114	4235597	624387
C-33 A	afatinib	72	10007.2	31147	4235597	624387
C-33 A	afatinib	72	31645.6	900	4235597	624387
CAL 27	afatinib	72	0.1	2524027	2678287	227427
CAL 27	afatinib	72	0.32	2665420	2678287	227427
CAL 27	afatinib	72	1	2492794	2678287	227427
CAL 27	afatinib	72	3.16	2083954	2678287	227427
CAL 27	afatinib	72	10.01	1713587	2678287	227427
CAL 27	afatinib	72	31.65	1301600	2678287	227427
CAL 27	afatinib	72	100.07	1207460	2678287	227427
CAL 27	afatinib	72	316.46	1194754	2678287	227427
CAL 27	afatinib	72	1000.72	1088074	2678287	227427
CCF-STTG1	afatinib	72	3.16	908180	815564	393124
CCF-STTG1	afatinib	72	10.01	844594	815564	393124
CCF-STTG1	afatinib	72	31.65	827187	815564	393124
CCF-STTG1	afatinib	72	100.07	812480	815564	393124
CCF-STTG1	afatinib	72	316.46	878087	815564	393124
CCF-STTG1	afatinib	72	1000.72	890747	815564	393124
CCF-STTG1	afatinib	72	3164.56	701440	815564	393124
CCF-STTG1	afatinib	72	10007.2	154134	815564	393124
CCF-STTG1	afatinib	72	31645.6	780	815564	393124
CCRF-CEM	afatinib	72	3.16	3025400	2938673	675110
CCRF-CEM	afatinib	72	10.01	2947880	2938673	675110
CCRF-CEM	afatinib	72	31.65	3023167	2938673	675110
CCRF-CEM	afatinib	72	100.07	2817714	2938673	675110
CCRF-CEM	afatinib	72	316.46	2606754	2938673	675110
CCRF-CEM	afatinib	72	1000.72	1684013	2938673	675110
CCRF-CEM	afatinib	72	3164.56	335780	2938673	675110
CCRF-CEM	afatinib	72	10007.2	3160	2938673	675110
CCRF-CEM	afatinib	72	31645.6	547	2938673	675110
COLO 205	afatinib	72	3.16	7488927	7000124	826210
COLO 205	afatinib	72	10.01	7304673	7000124	826210
COLO 205	afatinib	72	31.65	7432607	7000124	826210
COLO 205	afatinib	72	100.07	6630134	7000124	826210
COLO 205	afatinib	72	316.46	5839380	7000124	826210
COLO 205	afatinib	72	1000.72	4851034	7000124	826210
COLO 205	afatinib	72	3164.56	3662027	7000124	826210
COLO 205	afatinib	72	10007.2	517840	7000124	826210
COLO 205	afatinib	72	31645.6	2087	7000124	826210
COLO 829	afatinib	72	3.16	3029673	3066487	997923
COLO 829	afatinib	72	10.01	3060380	3066487	997923
COLO 829	afatinib	72	31.65	2932414	3066487	997923
COLO 829	afatinib	72	100.07	2857220	3066487	997923
COLO 829	afatinib	72	316.46	2978227	3066487	997923
COLO 829	afatinib	72	1000.72	2670827	3066487	997923
COLO 829	afatinib	72	3164.56	1986593	3066487	997923
COLO 829	afatinib	72	10007.2	593927	3066487	997923
COLO 829	afatinib	72	31645.6	2713	3066487	997923
Daoy	afatinib	72	3.16	6434267	5926480	1056580
Daoy	afatinib	72	10.01	5929360	5926480	1056580
Daoy	afatinib	72	31.65	6064547	5926480	1056580
Daoy	afatinib	72	100.07	5899954	5926480	1056580
Daoy	afatinib	72	316.46	6618640	5926480	1056580
Daoy	afatinib	72	1000.72	5657007	5926480	1056580
Daoy	afatinib	72	3164.56	2374340	5926480	1056580
Daoy	afatinib	72	10007.2	55307	5926480	1056580
Daoy	afatinib	72	31645.6	4447	5926480	1056580
DB	afatinib	72	3.16	3033080	3151087	501917
DB	afatinib	72	10.01	2686267	3151087	501917
DB	afatinib	72	31.65	3306374	3151087	501917
DB	afatinib	72	100.07	2892454	3151087	501917
DB	afatinib	72	316.46	2168987	3151087	501917
DB	afatinib	72	1000.72	1148620	3151087	501917
DB	afatinib	72	3164.56	709927	3151087	501917
DB	afatinib	72	10007.2	6294	3151087	501917
DB	afatinib	72	31645.6	434	3151087	501917
DLD-1	afatinib	72	3.16	12515813	12318653	1285390
DLD-1	afatinib	72	10.01	12079027	12318653	1285390
DLD-1	afatinib	72	31.65	11671994	12318653	1285390
DLD-1	afatinib	72	100.07	11750760	12318653	1285390
DLD-1	afatinib	72	316.46	10887267	12318653	1285390
DLD-1	afatinib	72	1000.72	9220953	12318653	1285390
DLD-1	afatinib	72	3164.56	5213293	12318653	1285390
DLD-1	afatinib	72	10007.2	371640	12318653	1285390
DLD-1	afatinib	72	31645.6	11054	12318653	1285390
DoTc2 4510	afatinib	72	0.1	2314327	2174300	258333
DoTc2 4510	afatinib	72	0.32	2135867	2174300	258333
DoTc2 4510	afatinib	72	1	1897314	2174300	258333
DoTc2 4510	afatinib	72	3.16	1732720	2174300	258333
DoTc2 4510	afatinib	72	10.01	1134747	2174300	258333
DoTc2 4510	afatinib	72	31.65	890474	2174300	258333
DoTc2 4510	afatinib	72	100.07	928453	2174300	258333
DoTc2 4510	afatinib	72	316.46	905053	2174300	258333
DoTc2 4510	afatinib	72	1000.72	788840	2174300	258333
DU 145	afatinib	72	3.16	4297027	4555657	747690
DU 145	afatinib	72	10.01	3761680	4555657	747690
DU 145	afatinib	72	31.65	2926680	4555657	747690
DU 145	afatinib	72	100.07	2775134	4555657	747690
DU 145	afatinib	72	316.46	2415127	4555657	747690
DU 145	afatinib	72	1000.72	2317940	4555657	747690
DU 145	afatinib	72	3164.56	1529767	4555657	747690
DU 145	afatinib	72	10007.2	339220	4555657	747690
DU 145	afatinib	72	31645.6	5500	4555657	747690
DU4475	afatinib	72	3.16	7629140	7096064	1853927
DU4475	afatinib	72	10.01	7196854	7096064	1853927
DU4475	afatinib	72	31.65	7200420	7096064	1853927
DU4475	afatinib	72	100.07	7312080	7096064	1853927
DU4475	afatinib	72	316.46	6875194	7096064	1853927
DU4475	afatinib	72	1000.72	6810480	7096064	1853927
DU4475	afatinib	72	3164.56	5958834	7096064	1853927
DU4475	afatinib	72	10007.2	18547	7096064	1853927
DU4475	afatinib	72	31645.6	5647	7096064	1853927
ES-2	afatinib	72	3.16	2228034	1858370	129983
ES-2	afatinib	72	10.01	2125240	1858370	129983
ES-2	afatinib	72	31.65	1805307	1858370	129983
ES-2	afatinib	72	100.07	1945667	1858370	129983
ES-2	afatinib	72	316.46	1350660	1858370	129983
ES-2	afatinib	72	1000.72	1142794	1858370	129983
ES-2	afatinib	72	3164.56	557740	1858370	129983
ES-2	afatinib	72	10007.2	25293	1858370	129983
ES-2	afatinib	72	31645.6	5087	1858370	129983
FaDu	afatinib	72	0.1	4751960	4791950	609234
FaDu	afatinib	72	0.32	4817794	4791950	609234
FaDu	afatinib	72	1	4127660	4791950	609234
FaDu	afatinib	72	3.16	3351127	4791950	609234
FaDu	afatinib	72	10.01	2711640	4791950	609234
FaDu	afatinib	72	31.65	2160407	4791950	609234
FaDu	afatinib	72	100.07	2088200	4791950	609234
FaDu	afatinib	72	316.46	2004720	4791950	609234
FaDu	afatinib	72	1000.72	1963053	4791950	609234
G-361	afatinib	72	3.16	2969460	2736644	649700
G-361	afatinib	72	10.01	2924347	2736644	649700
G-361	afatinib	72	31.65	2600547	2736644	649700
G-361	afatinib	72	100.07	2788414	2736644	649700
G-361	afatinib	72	316.46	2718220	2736644	649700
G-361	afatinib	72	1000.72	2328967	2736644	649700
G-361	afatinib	72	3164.56	772607	2736644	649700
G-361	afatinib	72	10007.2	5414	2736644	649700
G-361	afatinib	72	31645.6	6534	2736644	649700
HCT 116	afatinib	72	3.16	3243607	3294300	214967
HCT 116	afatinib	72	10.01	3302220	3294300	214967
HCT 116	afatinib	72	31.65	3234593	3294300	214967
HCT 116	afatinib	72	100.07	3129774	3294300	214967
HCT 116	afatinib	72	316.46	2493760	3294300	214967
HCT 116	afatinib	72	1000.72	1772474	3294300	214967
HCT 116	afatinib	72	3164.56	943834	3294300	214967
HCT 116	afatinib	72	10007.2	15180	3294300	214967
HCT 116	afatinib	72	31645.6	22820	3294300	214967
HCT-15	afatinib	72	3.16	9227507	9267940	692720
HCT-15	afatinib	72	10.01	8974640	9267940	692720
HCT-15	afatinib	72	31.65	9145440	9267940	692720
HCT-15	afatinib	72	100.07	9401114	9267940	692720
HCT-15	afatinib	72	316.46	9335514	9267940	692720
HCT-15	afatinib	72	1000.72	6311514	9267940	692720
HCT-15	afatinib	72	3164.56	3243687	9267940	692720
HCT-15	afatinib	72	10007.2	100760	9267940	692720
HCT-15	afatinib	72	31645.6	3127	9267940	692720
HL-60	afatinib	72	3.16	2247907	2297884	723324
HL-60	afatinib	72	10.01	2303727	2297884	723324
HL-60	afatinib	72	31.65	2266873	2297884	723324
HL-60	afatinib	72	100.07	2262253	2297884	723324
HL-60	afatinib	72	316.46	2153127	2297884	723324
HL-60	afatinib	72	1000.72	1800113	2297884	723324
HL-60	afatinib	72	3164.56	685227	2297884	723324
HL-60	afatinib	72	10007.2	2140	2297884	723324
HL-60	afatinib	72	31645.6	387	2297884	723324
Hs 578T	afatinib	72	3.16	1858407	1874807	558760
Hs 578T	afatinib	72	10.01	1879693	1874807	558760
Hs 578T	afatinib	72	31.65	1841114	1874807	558760
Hs 578T	afatinib	72	100.07	1858727	1874807	558760
Hs 578T	afatinib	72	316.46	1966747	1874807	558760
Hs 578T	afatinib	72	1000.72	1643460	1874807	558760
Hs 578T	afatinib	72	3164.56	719554	1874807	558760
Hs 578T	afatinib	72	10007.2	23700	1874807	558760
Hs 578T	afatinib	72	31645.6	307	1874807	558760
Hs 746T	afatinib	72	3.16	1564827	1640930	465460
Hs 746T	afatinib	72	10.01	1682567	1640930	465460
Hs 746T	afatinib	72	31.65	1485513	1640930	465460
Hs 746T	afatinib	72	100.07	1678587	1640930	465460
Hs 746T	afatinib	72	316.46	1511267	1640930	465460
Hs 746T	afatinib	72	1000.72	1433554	1640930	465460
Hs 746T	afatinib	72	3164.56	844693	1640930	465460
Hs 746T	afatinib	72	10007.2	3007	1640930	465460
Hs 746T	afatinib	72	31645.6	387	1640930	465460
Hs 766T	afatinib	72	3.16	1071540	1101814	392254
Hs 766T	afatinib	72	10.01	1001420	1101814	392254
Hs 766T	afatinib	72	31.65	902307	1101814	392254
Hs 766T	afatinib	72	100.07	921974	1101814	392254
Hs 766T	afatinib	72	316.46	908987	1101814	392254
Hs 766T	afatinib	72	1000.72	872234	1101814	392254
Hs 766T	afatinib	72	3164.56	628127	1101814	392254
Hs 766T	afatinib	72	10007.2	116394	1101814	392254
Hs 766T	afatinib	72	31645.6	12693	1101814	392254
HT	afatinib	72	3.16	6092373	6030894	1077827
HT	afatinib	72	10.01	6309794	6030894	1077827
HT	afatinib	72	31.65	6327080	6030894	1077827
HT	afatinib	72	100.07	6260847	6030894	1077827
HT	afatinib	72	316.46	4987587	6030894	1077827
HT	afatinib	72	1000.72	2724853	6030894	1077827
HT	afatinib	72	3164.56	1165113	6030894	1077827
HT	afatinib	72	10007.2	18307	6030894	1077827
HT	afatinib	72	31645.6	9360	6030894	1077827
HT-1080	afatinib	72	3.16	3333887	3688487	123714
HT-1080	afatinib	72	10.01	3835020	3688487	123714
HT-1080	afatinib	72	31.65	3838814	3688487	123714
HT-1080	afatinib	72	100.07	3994974	3688487	123714
HT-1080	afatinib	72	316.46	3913054	3688487	123714
HT-1080	afatinib	72	1000.72	3083380	3688487	123714
HT-1080	afatinib	72	3164.56	1607220	3688487	123714
HT-1080	afatinib	72	10007.2	34380	3688487	123714
HT-1080	afatinib	72	31645.6	16260	3688487	123714
HuTu 80	afatinib	72	3.16	6333220	6123477	469883
HuTu 80	afatinib	72	10.01	6104920	6123477	469883
HuTu 80	afatinib	72	31.65	5602867	6123477	469883
HuTu 80	afatinib	72	100.07	5416287	6123477	469883
HuTu 80	afatinib	72	316.46	5138707	6123477	469883
HuTu 80	afatinib	72	1000.72	4786507	6123477	469883
HuTu 80	afatinib	72	3164.56	3413640	6123477	469883
HuTu 80	afatinib	72	10007.2	44640	6123477	469883
HuTu 80	afatinib	72	31645.6	2333	6123477	469883
J82	afatinib	72	3.16	3510713	3552007	743173
J82	afatinib	72	10.01	3464120	3552007	743173
J82	afatinib	72	31.65	3300447	3552007	743173
J82	afatinib	72	100.07	3164027	3552007	743173
J82	afatinib	72	316.46	3040160	3552007	743173
J82	afatinib	72	1000.72	2927960	3552007	743173
J82	afatinib	72	3164.56	1986440	3552007	743173
J82	afatinib	72	10007.2	370994	3552007	743173
J82	afatinib	72	31645.6	24880	3552007	743173
JAR	afatinib	72	3.16	4612260	4222067	416273
JAR	afatinib	72	10.01	4761693	4222067	416273
JAR	afatinib	72	31.65	5109200	4222067	416273
JAR	afatinib	72	100.07	5384120	4222067	416273
JAR	afatinib	72	316.46	4602200	4222067	416273
JAR	afatinib	72	1000.72	4111427	4222067	416273
JAR	afatinib	72	3164.56	1108527	4222067	416273
JAR	afatinib	72	10007.2	7374	4222067	416273
JAR	afatinib	72	31645.6	18387	4222067	416273
Jurkat E6-1	afatinib	72	3.16	3216594	3136577	639833
Jurkat E6-1	afatinib	72	10.01	3085714	3136577	639833
Jurkat E6-1	afatinib	72	31.65	3002020	3136577	639833
Jurkat E6-1	afatinib	72	100.07	3114587	3136577	639833
Jurkat E6-1	afatinib	72	316.46	3144247	3136577	639833
Jurkat E6-1	afatinib	72	1000.72	2493133	3136577	639833
Jurkat E6-1	afatinib	72	3164.56	662634	3136577	639833
Jurkat E6-1	afatinib	72	10007.2	2560	3136577	639833
Jurkat E6-1	afatinib	72	31645.6	8687	3136577	639833
K-562	afatinib	72	3.16	8542640	8857840	546977
K-562	afatinib	72	10.01	8692754	8857840	546977
K-562	afatinib	72	31.65	8502920	8857840	546977
K-562	afatinib	72	100.07	8609087	8857840	546977
K-562	afatinib	72	316.46	7777520	8857840	546977
K-562	afatinib	72	1000.72	7700274	8857840	546977
K-562	afatinib	72	3164.56	3519200	8857840	546977
K-562	afatinib	72	10007.2	97020	8857840	546977
K-562	afatinib	72	31645.6	29094	8857840	546977
KATO III	afatinib	72	3.16	1165620	1062100	298033
KATO III	afatinib	72	10.01	1155280	1062100	298033
KATO III	afatinib	72	31.65	1069820	1062100	298033
KATO III	afatinib	72	100.07	1087760	1062100	298033
KATO III	afatinib	72	316.46	890540	1062100	298033
KATO III	afatinib	72	1000.72	778400	1062100	298033
KATO III	afatinib	72	3164.56	481733	1062100	298033
KATO III	afatinib	72	10007.2	53687	1062100	298033
KATO III	afatinib	72	31645.6	413	1062100	298033
KG-1	afatinib	72	3.16	2096400	2255440	846363
KG-1	afatinib	72	10.01	2319720	2255440	846363
KG-1	afatinib	72	31.65	2194887	2255440	846363
KG-1	afatinib	72	100.07	2207934	2255440	846363
KG-1	afatinib	72	316.46	2077660	2255440	846363
KG-1	afatinib	72	1000.72	1950167	2255440	846363
KG-1	afatinib	72	3164.56	1156240	2255440	846363
KG-1	afatinib	72	10007.2	83693	2255440	846363
KG-1	afatinib	72	31645.6	1067	2255440	846363
KLE	afatinib	72	0.1	2483827	2501889	1130720
KLE	afatinib	72	0.32	2296674	2501889	1130720
KLE	afatinib	72	1	2216660	2501889	1130720
KLE	afatinib	72	3.16	2006694	2501889	1130720
KLE	afatinib	72	10.01	1829587	2501889	1130720
KLE	afatinib	72	31.65	1956514	2501889	1130720
KLE	afatinib	72	100.07	1653160	2501889	1130720
KLE	afatinib	72	316.46	1532000	2501889	1130720
KLE	afatinib	72	1000.72	1316687	2501889	1130720
KU812	afatinib	72	3.16	1155727	1106357	619634
KU812	afatinib	72	10.01	1095074	1106357	619634
KU812	afatinib	72	31.65	1091307	1106357	619634
KU812	afatinib	72	100.07	1071807	1106357	619634
KU812	afatinib	72	316.46	946454	1106357	619634
KU812	afatinib	72	1000.72	713147	1106357	619634
KU812	afatinib	72	3164.56	251773	1106357	619634
KU812	afatinib	72	10007.2	24360	1106357	619634
KU812	afatinib	72	31645.6	9267	1106357	619634
LNCaP FGC	afatinib	72	3.16	3473774	3299897	1517247
LNCaP FGC	afatinib	72	10.01	3445147	3299897	1517247
LNCaP FGC	afatinib	72	31.65	3212840	3299897	1517247
LNCaP FGC	afatinib	72	100.07	3073854	3299897	1517247
LNCaP FGC	afatinib	72	316.46	2959627	3299897	1517247
LNCaP FGC	afatinib	72	1000.72	2898694	3299897	1517247
LNCaP FGC	afatinib	72	3164.56	2715060	3299897	1517247
LNCaP FGC	afatinib	72	10007.2	1083514	3299897	1517247
LNCaP FGC	afatinib	72	31645.6	3820	3299897	1517247
LoVo	afatinib	72	3.16	1675260	1498140	256727
LoVo	afatinib	72	10.01	1441820	1498140	256727
LoVo	afatinib	72	31.65	1352920	1498140	256727
LoVo	afatinib	72	100.07	1363300	1498140	256727
LoVo	afatinib	72	316.46	1030307	1498140	256727
LoVo	afatinib	72	1000.72	1129747	1498140	256727
LoVo	afatinib	72	3164.56	828254	1498140	256727
LoVo	afatinib	72	10007.2	200814	1498140	256727
LoVo	afatinib	72	31645.6	3533	1498140	256727
LS 174T	afatinib	72	3.16	1279614	1149160	155620
LS 174T	afatinib	72	10.01	1029007	1149160	155620
LS 174T	afatinib	72	31.65	1102987	1149160	155620
LS 174T	afatinib	72	100.07	889780	1149160	155620
LS 174T	afatinib	72	316.46	791467	1149160	155620
LS 174T	afatinib	72	1000.72	816280	1149160	155620
LS 174T	afatinib	72	3164.56	390940	1149160	155620
LS 174T	afatinib	72	10007.2	53260	1149160	155620
LS 174T	afatinib	72	31645.6	10107	1149160	155620
LS411N	afatinib	72	3.16	5916573	6036120	989447
LS411N	afatinib	72	10.01	5940574	6036120	989447
LS411N	afatinib	72	31.65	6386733	6036120	989447
LS411N	afatinib	72	100.07	6093287	6036120	989447
LS411N	afatinib	72	316.46	5298480	6036120	989447
LS411N	afatinib	72	1000.72	3218034	6036120	989447
LS411N	afatinib	72	3164.56	1422040	6036120	989447
LS411N	afatinib	72	10007.2	131567	6036120	989447
LS411N	afatinib	72	31645.6	1327	6036120	989447
MCF7	afatinib	72	3.16	3412760	3556373	1388747
MCF7	afatinib	72	10.01	3511767	3556373	1388747
MCF7	afatinib	72	31.65	3373927	3556373	1388747
MCF7	afatinib	72	100.07	3351834	3556373	1388747
MCF7	afatinib	72	316.46	3147087	3556373	1388747
MCF7	afatinib	72	1000.72	3351380	3556373	1388747
MCF7	afatinib	72	3164.56	3068787	3556373	1388747
MCF7	afatinib	72	10007.2	2211780	3556373	1388747
MCF7	afatinib	72	31645.6	6340	3556373	1388747
MeWo	afatinib	72	3.16	2419914	2386660	643387
MeWo	afatinib	72	10.01	2278847	2386660	643387
MeWo	afatinib	72	31.65	2327907	2386660	643387
MeWo	afatinib	72	100.07	2293593	2386660	643387
MeWo	afatinib	72	316.46	2291340	2386660	643387
MeWo	afatinib	72	1000.72	2055887	2386660	643387
MeWo	afatinib	72	3164.56	1657107	2386660	643387
MeWo	afatinib	72	10007.2	123507	2386660	643387
MeWo	afatinib	72	31645.6	820	2386660	643387
MG-63	afatinib	72	3.16	9340967	8904360	1421237
MG-63	afatinib	72	10.01	9303267	8904360	1421237
MG-63	afatinib	72	31.65	8997954	8904360	1421237
MG-63	afatinib	72	100.07	8496587	8904360	1421237
MG-63	afatinib	72	316.46	8402687	8904360	1421237
MG-63	afatinib	72	1000.72	8080893	8904360	1421237
MG-63	afatinib	72	3164.56	4867920	8904360	1421237
MG-63	afatinib	72	10007.2	223854	8904360	1421237
MG-63	afatinib	72	31645.6	1554	8904360	1421237
MIA PaCa-2	afatinib	72	3.16	9122527	8920024	1351313
MIA PaCa-2	afatinib	72	10.01	9981140	8920024	1351313
MIA PaCa-2	afatinib	72	31.65	8899620	8920024	1351313
MIA PaCa-2	afatinib	72	100.07	8755394	8920024	1351313
MIA PaCa-2	afatinib	72	316.46	9428527	8920024	1351313
MIA PaCa-2	afatinib	72	1000.72	8181667	8920024	1351313
MIA PaCa-2	afatinib	72	3164.56	2857767	8920024	1351313
MIA PaCa-2	afatinib	72	10007.2	37607	8920024	1351313
MIA PaCa-2	afatinib	72	31645.6	4720	8920024	1351313
MOLT-4	afatinib	72	3.16	4074054	4527543	503743
MOLT-4	afatinib	72	10.01	4200487	4527543	503743
MOLT-4	afatinib	72	31.65	4264087	4527543	503743
MOLT-4	afatinib	72	100.07	4032407	4527543	503743
MOLT-4	afatinib	72	316.46	3830567	4527543	503743
MOLT-4	afatinib	72	1000.72	2494074	4527543	503743
MOLT-4	afatinib	72	3164.56	720720	4527543	503743
MOLT-4	afatinib	72	10007.2	2587	4527543	503743
MOLT-4	afatinib	72	31645.6	314	4527543	503743
NCCIT	afatinib	72	3.16	3843180	3780427	398520
NCCIT	afatinib	72	10.01	3859953	3780427	398520
NCCIT	afatinib	72	31.65	2775227	3780427	398520
NCCIT	afatinib	72	100.07	3284234	3780427	398520
NCCIT	afatinib	72	316.46	3325220	3780427	398520
NCCIT	afatinib	72	1000.72	2291500	3780427	398520
NCCIT	afatinib	72	3164.56	1218374	3780427	398520
NCCIT	afatinib	72	10007.2	20193	3780427	398520
NCCIT	afatinib	72	31645.6	534	3780427	398520
NCI-H460	afatinib	72	3.16	10833214	12605667	702287
NCI-H460	afatinib	72	10.01	11457707	12605667	702287
NCI-H460	afatinib	72	31.65	13192527	12605667	702287
NCI-H460	afatinib	72	100.07	12119274	12605667	702287
NCI-H460	afatinib	72	316.46	10923027	12605667	702287
NCI-H460	afatinib	72	1000.72	8850987	12605667	702287
NCI-H460	afatinib	72	3164.56	6534074	12605667	702287
NCI-H460	afatinib	72	10007.2	931300	12605667	702287
NCI-H460	afatinib	72	31645.6	3427	12605667	702287
NCI-H661	afatinib	72	0.1	1426887	1493350	503417
NCI-H661	afatinib	72	0.32	1376247	1493350	503417
NCI-H661	afatinib	72	1	1405400	1493350	503417
NCI-H661	afatinib	72	3.16	1317600	1493350	503417
NCI-H661	afatinib	72	10.01	1231127	1493350	503417
NCI-H661	afatinib	72	31.65	965220	1493350	503417
NCI-H661	afatinib	72	100.07	1178340	1493350	503417
NCI-H661	afatinib	72	316.46	889567	1493350	503417
NCI-H661	afatinib	72	1000.72	961013	1493350	503417
NCI-H82	afatinib	72	3.16	6506827	6222497	759480
NCI-H82	afatinib	72	10.01	5704807	6222497	759480
NCI-H82	afatinib	72	31.65	7183007	6222497	759480
NCI-H82	afatinib	72	100.07	6273667	6222497	759480
NCI-H82	afatinib	72	316.46	6142327	6222497	759480
NCI-H82	afatinib	72	1000.72	5536927	6222497	759480
NCI-H82	afatinib	72	3164.56	2744314	6222497	759480
NCI-H82	afatinib	72	10007.2	61773	6222497	759480
NCI-H82	afatinib	72	31645.6	694	6222497	759480
OVCAR-3	afatinib	72	3.16	6511180	6576477	3417774
OVCAR-3	afatinib	72	10.01	5994800	6576477	3417774
OVCAR-3	afatinib	72	31.65	5348220	6576477	3417774
OVCAR-3	afatinib	72	100.07	5195260	6576477	3417774
OVCAR-3	afatinib	72	316.46	4478980	6576477	3417774
OVCAR-3	afatinib	72	1000.72	3558194	6576477	3417774
OVCAR-3	afatinib	72	3164.56	2394574	6576477	3417774
OVCAR-3	afatinib	72	10007.2	437734	6576477	3417774
OVCAR-3	afatinib	72	31645.6	11500	6576477	3417774
PA-1	afatinib	72	3.16	940594	928323	209260
PA-1	afatinib	72	10.01	884100	928323	209260
PA-1	afatinib	72	31.65	700360	928323	209260
PA-1	afatinib	72	100.07	818407	928323	209260
PA-1	afatinib	72	316.46	924694	928323	209260
PA-1	afatinib	72	1000.72	869067	928323	209260
PA-1	afatinib	72	3164.56	200507	928323	209260
PA-1	afatinib	72	10007.2	1294	928323	209260
PA-1	afatinib	72	31645.6	194	928323	209260
PC-3	afatinib	72	3.16	4605167	4262657	1089567
PC-3	afatinib	72	10.01	4813154	4262657	1089567
PC-3	afatinib	72	31.65	4271587	4262657	1089567
PC-3	afatinib	72	100.07	4455060	4262657	1089567
PC-3	afatinib	72	316.46	4695060	4262657	1089567
PC-3	afatinib	72	1000.72	4373207	4262657	1089567
PC-3	afatinib	72	3164.56	3451814	4262657	1089567
PC-3	afatinib	72	10007.2	416080	4262657	1089567
PC-3	afatinib	72	31645.6	2607	4262657	1089567
PFSK-1	afatinib	72	3.16	3049787	3120340	618834
PFSK-1	afatinib	72	10.01	3012960	3120340	618834
PFSK-1	afatinib	72	31.65	3544847	3120340	618834
PFSK-1	afatinib	72	100.07	2679120	3120340	618834
PFSK-1	afatinib	72	316.46	2631920	3120340	618834
PFSK-1	afatinib	72	1000.72	2309200	3120340	618834
PFSK-1	afatinib	72	3164.56	1572474	3120340	618834
PFSK-1	afatinib	72	10007.2	65727	3120340	618834
PFSK-1	afatinib	72	31645.6	16860	3120340	618834
RD	afatinib	72	3.16	1546620	1580787	342090
RD	afatinib	72	10.01	1411300	1580787	342090
RD	afatinib	72	31.65	1406180	1580787	342090
RD	afatinib	72	100.07	1433160	1580787	342090
RD	afatinib	72	316.46	1631247	1580787	342090
RD	afatinib	72	1000.72	1302874	1580787	342090
RD	afatinib	72	3164.56	253340	1580787	342090
RD	afatinib	72	10007.2	2207	1580787	342090
RD	afatinib	72	31645.6	3160	1580787	342090
RKO	afatinib	72	3.16	3117447	2884267	246337
RKO	afatinib	72	10.01	3078034	2884267	246337
RKO	afatinib	72	31.65	3118647	2884267	246337
RKO	afatinib	72	100.07	3077247	2884267	246337
RKO	afatinib	72	316.46	2730900	2884267	246337
RKO	afatinib	72	1000.72	2512354	2884267	246337
RKO	afatinib	72	3164.56	1452720	2884267	246337
RKO	afatinib	72	10007.2	15787	2884267	246337
RKO	afatinib	72	31645.6	314	2884267	246337
RL	afatinib	72	3.16	9895900	8331170	943683
RL	afatinib	72	10.01	10048453	8331170	943683
RL	afatinib	72	31.65	8871620	8331170	943683
RL	afatinib	72	100.07	10123773	8331170	943683
RL	afatinib	72	316.46	8740167	8331170	943683
RL	afatinib	72	1000.72	6303540	8331170	943683
RL	afatinib	72	3164.56	4072027	8331170	943683
RL	afatinib	72	10007.2	498313	8331170	943683
RL	afatinib	72	31645.6	13707	8331170	943683
RL95-2	afatinib	72	0.1	2330460	2257123	753947
RL95-2	afatinib	72	0.32	2185587	2257123	753947
RL95-2	afatinib	72	1	2164840	2257123	753947
RL95-2	afatinib	72	3.16	1844927	2257123	753947
RL95-2	afatinib	72	10.01	1667507	2257123	753947
RL95-2	afatinib	72	31.65	1423020	2257123	753947
RL95-2	afatinib	72	100.07	1349480	2257123	753947
RL95-2	afatinib	72	316.46	1330694	2257123	753947
RL95-2	afatinib	72	1000.72	1221174	2257123	753947
RPMI-7951	afatinib	72	3.16	2485680	2393527	368820
RPMI-7951	afatinib	72	10.01	2613473	2393527	368820
RPMI-7951	afatinib	72	31.65	2348827	2393527	368820
RPMI-7951	afatinib	72	100.07	2560820	2393527	368820
RPMI-7951	afatinib	72	316.46	2194687	2393527	368820
RPMI-7951	afatinib	72	1000.72	2306100	2393527	368820
RPMI-7951	afatinib	72	3164.56	1475167	2393527	368820
RPMI-7951	afatinib	72	10007.2	40394	2393527	368820
RPMI-7951	afatinib	72	31645.6	447	2393527	368820
RS4-11	afatinib	72	3.16	2061894	1969923	644417
RS4-11	afatinib	72	10.01	2157007	1969923	644417
RS4-11	afatinib	72	31.65	2006800	1969923	644417
RS4-11	afatinib	72	100.07	1950614	1969923	644417
RS4-11	afatinib	72	316.46	1912340	1969923	644417
RS4-11	afatinib	72	1000.72	1663347	1969923	644417
RS4-11	afatinib	72	3164.56	777534	1969923	644417
RS4-11	afatinib	72	10007.2	12567	1969923	644417
RS4-11	afatinib	72	31645.6	9420	1969923	644417
RT4	afatinib	72	3.16	7338840	7678944	2132063
RT4	afatinib	72	10.01	6197920	7678944	2132063
RT4	afatinib	72	31.65	5453507	7678944	2132063
RT4	afatinib	72	100.07	5179580	7678944	2132063
RT4	afatinib	72	316.46	4877767	7678944	2132063
RT4	afatinib	72	1000.72	3981827	7678944	2132063
RT4	afatinib	72	3164.56	1873427	7678944	2132063
RT4	afatinib	72	10007.2	7107	7678944	2132063
RT4	afatinib	72	31645.6	3887	7678944	2132063
SHP-77	afatinib	72	3.16	2684454	2682340	631427
SHP-77	afatinib	72	10.01	2734967	2682340	631427
SHP-77	afatinib	72	31.65	2854487	2682340	631427
SHP-77	afatinib	72	100.07	2862640	2682340	631427
SHP-77	afatinib	72	316.46	2854320	2682340	631427
SHP-77	afatinib	72	1000.72	2788173	2682340	631427
SHP-77	afatinib	72	3164.56	2074447	2682340	631427
SHP-77	afatinib	72	10007.2	21747	2682340	631427
SHP-77	afatinib	72	31645.6	34107	2682340	631427
SJCRH30	afatinib	72	3.16	3155347	3285377	655864
SJCRH30	afatinib	72	10.01	3409387	3285377	655864
SJCRH30	afatinib	72	31.65	3071533	3285377	655864
SJCRH30	afatinib	72	100.07	3154840	3285377	655864
SJCRH30	afatinib	72	316.46	3001527	3285377	655864
SJCRH30	afatinib	72	1000.72	2670713	3285377	655864
SJCRH30	afatinib	72	3164.56	1300460	3285377	655864
SJCRH30	afatinib	72	10007.2	4494	3285377	655864
SJCRH30	afatinib	72	31645.6	4734	3285377	655864
SK-N-AS	afatinib	72	3.16	1673753	1761940	546617
SK-N-AS	afatinib	72	10.01	1579813	1761940	546617
SK-N-AS	afatinib	72	31.65	1655347	1761940	546617
SK-N-AS	afatinib	72	100.07	1539494	1761940	546617
SK-N-AS	afatinib	72	316.46	1637340	1761940	546617
SK-N-AS	afatinib	72	1000.72	1244700	1761940	546617
SK-N-AS	afatinib	72	3164.56	466400	1761940	546617
SK-N-AS	afatinib	72	10007.2	77873	1761940	546617
SK-N-AS	afatinib	72	31645.6	4307	1761940	546617
SK-N-FI	afatinib	72	3.16	1088280	1209677	534293
SK-N-FI	afatinib	72	10.01	1084887	1209677	534293
SK-N-FI	afatinib	72	31.65	1156147	1209677	534293
SK-N-FI	afatinib	72	100.07	1046613	1209677	534293
SK-N-FI	afatinib	72	316.46	1105200	1209677	534293
SK-N-FI	afatinib	72	1000.72	920400	1209677	534293
SK-N-FI	afatinib	72	3164.56	238947	1209677	534293
SK-N-FI	afatinib	72	10007.2	6220	1209677	534293
SK-N-FI	afatinib	72	31645.6	1733	1209677	534293
SNU-5	afatinib	72	3.16	2573533	3040840	1056854
SNU-5	afatinib	72	10.01	3000860	3040840	1056854
SNU-5	afatinib	72	31.65	2889440	3040840	1056854
SNU-5	afatinib	72	100.07	2829600	3040840	1056854
SNU-5	afatinib	72	316.46	2527660	3040840	1056854
SNU-5	afatinib	72	1000.72	2426074	3040840	1056854
SNU-5	afatinib	72	3164.56	1813300	3040840	1056854
SNU-5	afatinib	72	10007.2	52740	3040840	1056854
SNU-5	afatinib	72	31645.6	800	3040840	1056854
SNU-C2B	afatinib	72	3.16	848567	959424	427920
SNU-C2B	afatinib	72	10.01	1000260	959424	427920
SNU-C2B	afatinib	72	31.65	884807	959424	427920
SNU-C2B	afatinib	72	100.07	759094	959424	427920
SNU-C2B	afatinib	72	316.46	748974	959424	427920
SNU-C2B	afatinib	72	1000.72	578734	959424	427920
SNU-C2B	afatinib	72	3164.56	555874	959424	427920
SNU-C2B	afatinib	72	10007.2	241027	959424	427920
SNU-C2B	afatinib	72	31645.6	17907	959424	427920
SR	afatinib	72	3.16	3027400	2844750	646174
SR	afatinib	72	10.01	2745047	2844750	646174
SR	afatinib	72	31.65	3163860	2844750	646174
SR	afatinib	72	100.07	2964987	2844750	646174
SR	afatinib	72	316.46	2639247	2844750	646174
SR	afatinib	72	1000.72	1789540	2844750	646174
SR	afatinib	72	3164.56	387680	2844750	646174
SR	afatinib	72	10007.2	1327	2844750	646174
SR	afatinib	72	31645.6	240	2844750	646174
SU-DHL-1	afatinib	72	3.16	7559640	8666280	594550
SU-DHL-1	afatinib	72	10.01	8725107	8666280	594550
SU-DHL-1	afatinib	72	31.65	7948960	8666280	594550
SU-DHL-1	afatinib	72	100.07	8158740	8666280	594550
SU-DHL-1	afatinib	72	316.46	7438680	8666280	594550
SU-DHL-1	afatinib	72	1000.72	6851714	8666280	594550
SU-DHL-1	afatinib	72	3164.56	3796300	8666280	594550
SU-DHL-1	afatinib	72	10007.2	10327	8666280	594550
SU-DHL-1	afatinib	72	31645.6	314	8666280	594550
SU-DHL-6	afatinib	72	3.16	5046780	5386040	1519553
SU-DHL-6	afatinib	72	10.01	5004680	5386040	1519553
SU-DHL-6	afatinib	72	31.65	4898600	5386040	1519553
SU-DHL-6	afatinib	72	100.07	5043360	5386040	1519553
SU-DHL-6	afatinib	72	316.46	3756347	5386040	1519553
SU-DHL-6	afatinib	72	1000.72	2521500	5386040	1519553
SU-DHL-6	afatinib	72	3164.56	397733	5386040	1519553
SU-DHL-6	afatinib	72	10007.2	1840	5386040	1519553
SU-DHL-6	afatinib	72	31645.6	294	5386040	1519553
SUP-T1	afatinib	72	3.16	4766334	4778397	869897
SUP-T1	afatinib	72	10.01	4914313	4778397	869897
SUP-T1	afatinib	72	31.65	4980493	4778397	869897
SUP-T1	afatinib	72	100.07	4894807	4778397	869897
SUP-T1	afatinib	72	316.46	4780667	4778397	869897
SUP-T1	afatinib	72	1000.72	4417447	4778397	869897
SUP-T1	afatinib	72	3164.56	3227580	4778397	869897
SUP-T1	afatinib	72	10007.2	44134	4778397	869897
SUP-T1	afatinib	72	31645.6	760	4778397	869897
SW48	afatinib	72	0.01	6333520	6020843	1349060
SW48	afatinib	72	0.03	6093094	6020843	1349060
SW48	afatinib	72	0.1	5529234	6020843	1349060
SW48	afatinib	72	0.32	4541527	6020843	1349060
SW48	afatinib	72	1	3400720	6020843	1349060
SW48	afatinib	72	3.16	2892547	6020843	1349060
SW48	afatinib	72	10.01	2773547	6020843	1349060
SW48	afatinib	72	31.65	2522767	6020843	1349060
SW48	afatinib	72	100.07	2021033	6020843	1349060
SW480	afatinib	72	3.16	4526274	4674084	739263
SW480	afatinib	72	10.01	4480494	4674084	739263
SW480	afatinib	72	31.65	4354667	4674084	739263
SW480	afatinib	72	100.07	4379214	4674084	739263
SW480	afatinib	72	316.46	4250947	4674084	739263
SW480	afatinib	72	1000.72	3904734	4674084	739263
SW480	afatinib	72	3164.56	3071027	4674084	739263
SW480	afatinib	72	10007.2	627567	4674084	739263
SW480	afatinib	72	31645.6	3800	4674084	739263
SW620	afatinib	72	3.16	7664067	8064290	830353
SW620	afatinib	72	10.01	7520087	8064290	830353
SW620	afatinib	72	31.65	7174100	8064290	830353
SW620	afatinib	72	100.07	7592527	8064290	830353
SW620	afatinib	72	316.46	6970227	8064290	830353
SW620	afatinib	72	1000.72	6405700	8064290	830353
SW620	afatinib	72	3164.56	5671633	8064290	830353
SW620	afatinib	72	10007.2	42300	8064290	830353
SW620	afatinib	72	31645.6	1620	8064290	830353
SW626	afatinib	72	3.16	2227260	2170693	951680
SW626	afatinib	72	10.01	1969874	2170693	951680
SW626	afatinib	72	31.65	2271007	2170693	951680
SW626	afatinib	72	100.07	2348920	2170693	951680
SW626	afatinib	72	316.46	2016420	2170693	951680
SW626	afatinib	72	1000.72	1754487	2170693	951680
SW626	afatinib	72	3164.56	1296340	2170693	951680
SW626	afatinib	72	10007.2	514687	2170693	951680
SW626	afatinib	72	31645.6	13167	2170693	951680
SW837	afatinib	72	3.16	3456133	3337750	892850
SW837	afatinib	72	10.01	3603287	3337750	892850
SW837	afatinib	72	31.65	3239467	3337750	892850
SW837	afatinib	72	100.07	3056500	3337750	892850
SW837	afatinib	72	316.46	2883534	3337750	892850
SW837	afatinib	72	1000.72	2784787	3337750	892850
SW837	afatinib	72	3164.56	2182900	3337750	892850
SW837	afatinib	72	10007.2	852747	3337750	892850
SW837	afatinib	72	31645.6	72080	3337750	892850
SW872	afatinib	72	3.16	5402194	4968663	919067
SW872	afatinib	72	10.01	5192760	4968663	919067
SW872	afatinib	72	31.65	5212233	4968663	919067
SW872	afatinib	72	100.07	5055487	4968663	919067
SW872	afatinib	72	316.46	5241167	4968663	919067
SW872	afatinib	72	1000.72	4835400	4968663	919067
SW872	afatinib	72	3164.56	3519827	4968663	919067
SW872	afatinib	72	10007.2	1019020	4968663	919067
SW872	afatinib	72	31645.6	23574	4968663	919067
SW900	afatinib	72	3.16	5553694	5454037	1094713
SW900	afatinib	72	10.01	5773407	5454037	1094713
SW900	afatinib	72	31.65	5434533	5454037	1094713
SW900	afatinib	72	100.07	5467974	5454037	1094713
SW900	afatinib	72	316.46	5068647	5454037	1094713
SW900	afatinib	72	1000.72	4514660	5454037	1094713
SW900	afatinib	72	3164.56	3159220	5454037	1094713
SW900	afatinib	72	10007.2	750480	5454037	1094713
SW900	afatinib	72	31645.6	15560	5454037	1094713
SW948	afatinib	72	3.16	3331240	3160590	595840
SW948	afatinib	72	10.01	3237760	3160590	595840
SW948	afatinib	72	31.65	3343907	3160590	595840
SW948	afatinib	72	100.07	3161600	3160590	595840
SW948	afatinib	72	316.46	3201107	3160590	595840
SW948	afatinib	72	1000.72	2691694	3160590	595840
SW948	afatinib	72	3164.56	1767967	3160590	595840
SW948	afatinib	72	10007.2	691040	3160590	595840
SW948	afatinib	72	31645.6	18793	3160590	595840
SW982	afatinib	72	3.16	4247947	4244627	815520
SW982	afatinib	72	10.01	4284760	4244627	815520
SW982	afatinib	72	31.65	4121574	4244627	815520
SW982	afatinib	72	100.07	4153460	4244627	815520
SW982	afatinib	72	316.46	4184240	4244627	815520
SW982	afatinib	72	1000.72	3397180	4244627	815520
SW982	afatinib	72	3164.56	2008507	4244627	815520
SW982	afatinib	72	10007.2	608140	4244627	815520
SW982	afatinib	72	31645.6	15420	4244627	815520
T24	afatinib	72	3.16	5902220	6198207	576873
T24	afatinib	72	10.01	6492480	6198207	576873
T24	afatinib	72	31.65	6074367	6198207	576873
T24	afatinib	72	100.07	6143340	6198207	576873
T24	afatinib	72	316.46	5703940	6198207	576873
T24	afatinib	72	1000.72	4954367	6198207	576873
T24	afatinib	72	3164.56	2824434	6198207	576873
T24	afatinib	72	10007.2	144027	6198207	576873
T24	afatinib	72	31645.6	6660	6198207	576873
T98G	afatinib	72	3.16	5582420	6035637	769717
T98G	afatinib	72	10.01	5963180	6035637	769717
T98G	afatinib	72	31.65	5917007	6035637	769717
T98G	afatinib	72	100.07	5041460	6035637	769717
T98G	afatinib	72	316.46	5413807	6035637	769717
T98G	afatinib	72	1000.72	5099880	6035637	769717
T98G	afatinib	72	3164.56	4053460	6035637	769717
T98G	afatinib	72	10007.2	1062294	6035637	769717
T98G	afatinib	72	31645.6	3827	6035637	769717
TCCSUP	afatinib	72	3.16	1613927	1427970	344900
TCCSUP	afatinib	72	10.01	1337753	1427970	344900
TCCSUP	afatinib	72	31.65	1423407	1427970	344900
TCCSUP	afatinib	72	100.07	1371834	1427970	344900
TCCSUP	afatinib	72	316.46	1352767	1427970	344900
TCCSUP	afatinib	72	1000.72	1250113	1427970	344900
TCCSUP	afatinib	72	3164.56	815560	1427970	344900
TCCSUP	afatinib	72	10007.2	227107	1427970	344900
TCCSUP	afatinib	72	31645.6	10033	1427970	344900
THP-1	afatinib	72	3.16	9642514	9092500	3495254
THP-1	afatinib	72	10.01	9702200	9092500	3495254
THP-1	afatinib	72	31.65	8956700	9092500	3495254
THP-1	afatinib	72	100.07	8427587	9092500	3495254
THP-1	afatinib	72	316.46	9286133	9092500	3495254
THP-1	afatinib	72	1000.72	7338013	9092500	3495254
THP-1	afatinib	72	3164.56	5052100	9092500	3495254
THP-1	afatinib	72	10007.2	1300894	9092500	3495254
THP-1	afatinib	72	31645.6	26640	9092500	3495254
TT	afatinib	72	3.16	2195920	2079273	1415184
TT	afatinib	72	10.01	2151187	2079273	1415184
TT	afatinib	72	31.65	2175860	2079273	1415184
TT	afatinib	72	100.07	2105534	2079273	1415184
TT	afatinib	72	316.46	2002027	2079273	1415184
TT	afatinib	72	1000.72	2027154	2079273	1415184
TT	afatinib	72	3164.56	1645993	2079273	1415184
TT	afatinib	72	10007.2	163260	2079273	1415184
TT	afatinib	72	31645.6	887	2079273	1415184
U-118 MG	afatinib	72	3.16	1702460	1841207	433060
U-118 MG	afatinib	72	10.01	2045114	1841207	433060
U-118 MG	afatinib	72	31.65	1958607	1841207	433060
U-118 MG	afatinib	72	100.07	2054160	1841207	433060
U-118 MG	afatinib	72	316.46	1932254	1841207	433060
U-118 MG	afatinib	72	1000.72	1878400	1841207	433060
U-118 MG	afatinib	72	3164.56	886360	1841207	433060
U-118 MG	afatinib	72	10007.2	111387	1841207	433060
U-118 MG	afatinib	72	31645.6	4727	1841207	433060
U-2 OS	afatinib	72	3.16	2341934	2448090	432857
U-2 OS	afatinib	72	10.01	2270427	2448090	432857
U-2 OS	afatinib	72	31.65	2186080	2448090	432857
U-2 OS	afatinib	72	100.07	2055460	2448090	432857
U-2 OS	afatinib	72	316.46	1995847	2448090	432857
U-2 OS	afatinib	72	1000.72	1663300	2448090	432857
U-2 OS	afatinib	72	3164.56	962594	2448090	432857
U-2 OS	afatinib	72	10007.2	39934	2448090	432857
U-2 OS	afatinib	72	31645.6	8380	2448090	432857
U-87 MG	afatinib	72	3.16	2834660	2635240	516310
U-87 MG	afatinib	72	10.01	2627040	2635240	516310
U-87 MG	afatinib	72	31.65	2741147	2635240	516310
U-87 MG	afatinib	72	100.07	2509447	2635240	516310
U-87 MG	afatinib	72	316.46	2571534	2635240	516310
U-87 MG	afatinib	72	1000.72	2428533	2635240	516310
U-87 MG	afatinib	72	3164.56	2045307	2635240	516310
U-87 MG	afatinib	72	10007.2	61847	2635240	516310
U-87 MG	afatinib	72	31645.6	6247	2635240	516310
VA-ES-BJ	afatinib	72	3.16	2811980	2651020	727107
VA-ES-BJ	afatinib	72	10.01	2562447	2651020	727107
VA-ES-BJ	afatinib	72	31.65	2440687	2651020	727107
VA-ES-BJ	afatinib	72	100.07	2428107	2651020	727107
VA-ES-BJ	afatinib	72	316.46	2593514	2651020	727107
VA-ES-BJ	afatinib	72	1000.72	2180633	2651020	727107
VA-ES-BJ	afatinib	72	3164.56	1032533	2651020	727107
VA-ES-BJ	afatinib	72	10007.2	94227	2651020	727107
VA-ES-BJ	afatinib	72	31645.6	4820	2651020	727107
5637	crizotinib	72	3.16	2601487	2602580	539443
5637	crizotinib	72	10.01	2618814	2602580	539443
5637	crizotinib	72	31.65	2501154	2602580	539443
5637	crizotinib	72	100.07	2412447	2602580	539443
5637	crizotinib	72	316.46	2757707	2602580	539443
5637	crizotinib	72	1000.72	2229340	2602580	539443
5637	crizotinib	72	3164.56	494627	2602580	539443
5637	crizotinib	72	10007.2	102033	2602580	539443
5637	crizotinib	72	31645.6	29600	2602580	539443
769-P	crizotinib	72	3.16	4830914	4593740	640747
769-P	crizotinib	72	10.01	4762760	4593740	640747
769-P	crizotinib	72	31.65	5069914	4593740	640747
769-P	crizotinib	72	100.07	4404974	4593740	640747
769-P	crizotinib	72	316.46	4955420	4593740	640747
769-P	crizotinib	72	1000.72	4490094	4593740	640747
769-P	crizotinib	72	3164.56	1717854	4593740	640747
769-P	crizotinib	72	10007.2	12020	4593740	640747
769-P	crizotinib	72	31645.6	5394	4593740	640747
786-O	crizotinib	72	3.16	5870634	5137590	566020
786-O	crizotinib	72	10.01	5120540	5137590	566020
786-O	crizotinib	72	31.65	5020534	5137590	566020
786-O	crizotinib	72	100.07	5375927	5137590	566020
786-O	crizotinib	72	316.46	5864787	5137590	566020
786-O	crizotinib	72	1000.72	4922047	5137590	566020
786-O	crizotinib	72	3164.56	2450254	5137590	566020
786-O	crizotinib	72	10007.2	319387	5137590	566020
786-O	crizotinib	72	31645.6	14840	5137590	566020
A-172	crizotinib	72	3.16	1272614	1371350	422517
A-172	crizotinib	72	10.01	1335667	1371350	422517
A-172	crizotinib	72	31.65	1245387	1371350	422517
A-172	crizotinib	72	100.07	1449074	1371350	422517
A-172	crizotinib	72	316.46	1254560	1371350	422517
A-172	crizotinib	72	1000.72	943927	1371350	422517
A-172	crizotinib	72	3164.56	637994	1371350	422517
A-172	crizotinib	72	10007.2	2260	1371350	422517
A-172	crizotinib	72	31645.6	187	1371350	422517
A-204	crizotinib	72	3.16	2249960	2650490	558803
A-204	crizotinib	72	10.01	2398174	2650490	558803
A-204	crizotinib	72	31.65	3003514	2650490	558803
A-204	crizotinib	72	100.07	2932947	2650490	558803
A-204	crizotinib	72	316.46	3021907	2650490	558803
A-204	crizotinib	72	1000.72	1651487	2650490	558803
A-204	crizotinib	72	3164.56	1433934	2650490	558803
A-204	crizotinib	72	10007.2	124040	2650490	558803
A-204	crizotinib	72	31645.6	10967	2650490	558803
A375	crizotinib	72	3.16	3997594	4082014	623914
A375	crizotinib	72	10.01	4152480	4082014	623914
A375	crizotinib	72	31.65	4183960	4082014	623914
A375	crizotinib	72	100.07	4307914	4082014	623914
A375	crizotinib	72	316.46	4216667	4082014	623914
A375	crizotinib	72	1000.72	3400347	4082014	623914
A375	crizotinib	72	3164.56	1057433	4082014	623914
A375	crizotinib	72	10007.2	54774	4082014	623914
A375	crizotinib	72	31645.6	340	4082014	623914
A388	crizotinib	72	3.16	1945833	2059567	598500
A388	crizotinib	72	10.01	1882247	2059567	598500
A388	crizotinib	72	31.65	1988814	2059567	598500
A388	crizotinib	72	100.07	1931167	2059567	598500
A388	crizotinib	72	316.46	1954460	2059567	598500
A388	crizotinib	72	1000.72	1639360	2059567	598500
A388	crizotinib	72	3164.56	988780	2059567	598500
A388	crizotinib	72	10007.2	111307	2059567	598500
A388	crizotinib	72	31645.6	634	2059567	598500
A-427	crizotinib	72	3.16	1854120	1762320	210960
A-427	crizotinib	72	10.01	1959173	1762320	210960
A-427	crizotinib	72	31.65	1619240	1762320	210960
A-427	crizotinib	72	100.07	1752460	1762320	210960
A-427	crizotinib	72	316.46	1574947	1762320	210960
A-427	crizotinib	72	1000.72	1046440	1762320	210960
A-427	crizotinib	72	3164.56	234060	1762320	210960
A-427	crizotinib	72	10007.2	4633	1762320	210960
A-427	crizotinib	72	31645.6	167	1762320	210960
A-498	crizotinib	72	3.16	2650107	2519230	596267
A-498	crizotinib	72	10.01	2312387	2519230	596267
A-498	crizotinib	72	31.65	2689000	2519230	596267
A-498	crizotinib	72	100.07	2571060	2519230	596267
A-498	crizotinib	72	316.46	2411927	2519230	596267
A-498	crizotinib	72	1000.72	2006434	2519230	596267
A-498	crizotinib	72	3164.56	1154767	2519230	596267
A-498	crizotinib	72	10007.2	118647	2519230	596267
A-498	crizotinib	72	31645.6	614	2519230	596267
A-549	crizotinib	72	3.16	6275093	6562940	873617
A-549	crizotinib	72	10.01	6621320	6562940	873617
A-549	crizotinib	72	31.65	6283827	6562940	873617
A-549	crizotinib	72	100.07	6601733	6562940	873617
A-549	crizotinib	72	316.46	6625154	6562940	873617
A-549	crizotinib	72	1000.72	5711820	6562940	873617
A-549	crizotinib	72	3164.56	2114893	6562940	873617
A-549	crizotinib	72	10007.2	190387	6562940	873617
A-549	crizotinib	72	31645.6	3720	6562940	873617
A-704	crizotinib	72	3.16	4534547	4590587	2223854
A-704	crizotinib	72	10.01	4499573	4590587	2223854
A-704	crizotinib	72	31.65	4355820	4590587	2223854
A-704	crizotinib	72	100.07	4609527	4590587	2223854
A-704	crizotinib	72	316.46	4552800	4590587	2223854
A-704	crizotinib	72	1000.72	4281314	4590587	2223854
A-704	crizotinib	72	3164.56	3268354	4590587	2223854
A-704	crizotinib	72	10007.2	392007	4590587	2223854
A-704	crizotinib	72	31645.6	2400	4590587	2223854
ACHN	crizotinib	72	3.16	8181887	8121713	1488743
ACHN	crizotinib	72	10.01	7804420	8121713	1488743
ACHN	crizotinib	72	31.65	8514414	8121713	1488743
ACHN	crizotinib	72	100.07	8349220	8121713	1488743
ACHN	crizotinib	72	316.46	8436927	8121713	1488743
ACHN	crizotinib	72	1000.72	7484634	8121713	1488743
ACHN	crizotinib	72	3164.56	4977947	8121713	1488743
ACHN	crizotinib	72	10007.2	558834	8121713	1488743
ACHN	crizotinib	72	31645.6	2220	8121713	1488743
AN3 CA	crizotinib	72	3.16	689100	695364	152347
AN3 CA	crizotinib	72	10.01	729127	695364	152347
AN3 CA	crizotinib	72	31.65	750207	695364	152347
AN3 CA	crizotinib	72	100.07	694614	695364	152347
AN3 CA	crizotinib	72	316.46	728560	695364	152347
AN3 CA	crizotinib	72	1000.72	482720	695364	152347
AN3 CA	crizotinib	72	3164.56	340527	695364	152347
AN3 CA	crizotinib	72	10007.2	21774	695364	152347
AN3 CA	crizotinib	72	31645.6	407	695364	152347
AsPC-1	crizotinib	72	3.16	3918174	3823040	1179297
AsPC-1	crizotinib	72	10.01	4258840	3823040	1179297
AsPC-1	crizotinib	72	31.65	4117627	3823040	1179297
AsPC-1	crizotinib	72	100.07	3739800	3823040	1179297
AsPC-1	crizotinib	72	316.46	3597187	3823040	1179297
AsPC-1	crizotinib	72	1000.72	3403767	3823040	1179297
AsPC-1	crizotinib	72	3164.56	1686667	3823040	1179297
AsPC-1	crizotinib	72	10007.2	563593	3823040	1179297
AsPC-1	crizotinib	72	31645.6	15687	3823040	1179297
AU-565	crizotinib	72	3.16	3271127	3145747	1452754
AU-565	crizotinib	72	10.01	3129913	3145747	1452754
AU-565	crizotinib	72	31.65	3404513	3145747	1452754
AU-565	crizotinib	72	100.07	3127714	3145747	1452754
AU-565	crizotinib	72	316.46	3088947	3145747	1452754
AU-565	crizotinib	72	1000.72	3073113	3145747	1452754
AU-565	crizotinib	72	3164.56	2910340	3145747	1452754
AU-565	crizotinib	72	10007.2	644573	3145747	1452754
AU-565	crizotinib	72	31645.6	26660	3145747	1452754
BL-70	crizotinib	72	3.16	7664227	7165674	550510
BL-70	crizotinib	72	9.99	7206573	7165674	550510
BL-70	crizotinib	72	31.6	7809807	7165674	550510
BL-70	crizotinib	72	99.93	7948227	7165674	550510
BL-70	crizotinib	72	316	7546007	7165674	550510
BL-70	crizotinib	72	999.28	6154087	7165674	550510
BL-70	crizotinib	72	3160	534160	7165674	550510
BL-70	crizotinib	72	9992.8	6827	7165674	550510
BL-70	crizotinib	72	31600	21700	7165674	550510
BT-20	crizotinib	72	3.16	3655000	3742617	1571177
BT-20	crizotinib	72	10.01	3518327	3742617	1571177
BT-20	crizotinib	72	31.65	3632993	3742617	1571177
BT-20	crizotinib	72	100.07	3620580	3742617	1571177
BT-20	crizotinib	72	316.46	3837300	3742617	1571177
BT-20	crizotinib	72	1000.72	3546480	3742617	1571177
BT-20	crizotinib	72	3164.56	3320347	3742617	1571177
BT-20	crizotinib	72	10007.2	2010774	3742617	1571177
BT-20	crizotinib	72	31645.6	67067	3742617	1571177
BT-474	crizotinib	72	3.16	2318853	2241807	1512537
BT-474	crizotinib	72	9.99	2385494	2241807	1512537
BT-474	crizotinib	72	31.6	2357667	2241807	1512537
BT-474	crizotinib	72	99.93	2298934	2241807	1512537
BT-474	crizotinib	72	316	2629760	2241807	1512537
BT-474	crizotinib	72	999.28	2628553	2241807	1512537
BT-474	crizotinib	72	3160	2557814	2241807	1512537
BT-474	crizotinib	72	9992.8	356174	2241807	1512537
BT-474	crizotinib	72	31600	10020	2241807	1512537
BT-549	crizotinib	72	3.16	3086380	3060447	527253
BT-549	crizotinib	72	10.01	2561334	3060447	527253
BT-549	crizotinib	72	31.65	2548627	3060447	527253
BT-549	crizotinib	72	100.07	2849887	3060447	527253
BT-549	crizotinib	72	316.46	2880120	3060447	527253
BT-549	crizotinib	72	1000.72	3334560	3060447	527253
BT-549	crizotinib	72	3164.56	1784300	3060447	527253
BT-549	crizotinib	72	10007.2	160154	3060447	527253
BT-549	crizotinib	72	31645.6	1127	3060447	527253
BxPC-3	crizotinib	72	3.16	640013	525690	163520
BxPC-3	crizotinib	72	10.01	630734	525690	163520
BxPC-3	crizotinib	72	31.65	634613	525690	163520
BxPC-3	crizotinib	72	100.07	660107	525690	163520
BxPC-3	crizotinib	72	316.46	521267	525690	163520
BxPC-3	crizotinib	72	1000.72	594333	525690	163520
BxPC-3	crizotinib	72	3164.56	229320	525690	163520
BxPC-3	crizotinib	72	10007.2	2287	525690	163520
BxPC-3	crizotinib	72	31645.6	220	525690	163520
C-33 A	crizotinib	72	3.16	3869880	4211770	723800
C-33 A	crizotinib	72	10.01	3619734	4211770	723800
C-33 A	crizotinib	72	31.65	3672020	4211770	723800
C-33 A	crizotinib	72	100.07	3929153	4211770	723800
C-33 A	crizotinib	72	316.46	3800167	4211770	723800
C-33 A	crizotinib	72	1000.72	3603387	4211770	723800
C-33 A	crizotinib	72	3164.56	2866307	4211770	723800
C-33 A	crizotinib	72	10007.2	1273087	4211770	723800
C-33 A	crizotinib	72	31645.6	7133	4211770	723800
CAL 27	crizotinib	72	3.16	1972167	2044623	236190
CAL 27	crizotinib	72	10.01	1920293	2044623	236190
CAL 27	crizotinib	72	31.65	2023940	2044623	236190
CAL 27	crizotinib	72	100.07	2061807	2044623	236190
CAL 27	crizotinib	72	316.46	1918773	2044623	236190
CAL 27	crizotinib	72	1000.72	1435413	2044623	236190
CAL 27	crizotinib	72	3164.56	460794	2044623	236190
CAL 27	crizotinib	72	10007.2	21394	2044623	236190
CAL 27	crizotinib	72	31645.6	253	2044623	236190
CCF-STTG1	crizotinib	72	3.16	938960	896530	351787
CCF-STTG1	crizotinib	72	10.01	1004447	896530	351787
CCF-STTG1	crizotinib	72	31.65	898087	896530	351787
CCF-STTG1	crizotinib	72	100.07	1042047	896530	351787
CCF-STTG1	crizotinib	72	316.46	951513	896530	351787
CCF-STTG1	crizotinib	72	1000.72	912474	896530	351787
CCF-STTG1	crizotinib	72	3164.56	973467	896530	351787
CCF-STTG1	crizotinib	72	10007.2	66154	896530	351787
CCF-STTG1	crizotinib	72	31645.6	487	896530	351787
CCRF-CEM	crizotinib	72	3.16	4884567	4810480	1067207
CCRF-CEM	crizotinib	72	10.01	4733007	4810480	1067207
CCRF-CEM	crizotinib	72	31.65	4401893	4810480	1067207
CCRF-CEM	crizotinib	72	100.07	4781120	4810480	1067207
CCRF-CEM	crizotinib	72	316.46	4599393	4810480	1067207
CCRF-CEM	crizotinib	72	1000.72	3938427	4810480	1067207
CCRF-CEM	crizotinib	72	3164.56	1358734	4810480	1067207
CCRF-CEM	crizotinib	72	10007.2	31487	4810480	1067207
CCRF-CEM	crizotinib	72	31645.6	794	4810480	1067207
COLO 205	crizotinib	72	3.16	7632500	7893633	958993
COLO 205	crizotinib	72	10.01	7824847	7893633	958993
COLO 205	crizotinib	72	31.65	7017880	7893633	958993
COLO 205	crizotinib	72	100.07	8134454	7893633	958993
COLO 205	crizotinib	72	316.46	7757540	7893633	958993
COLO 205	crizotinib	72	1000.72	6311587	7893633	958993
COLO 205	crizotinib	72	3164.56	1714814	7893633	958993
COLO 205	crizotinib	72	10007.2	159387	7893633	958993
COLO 205	crizotinib	72	31645.6	1087	7893633	958993
COLO 829	crizotinib	72	3.16	2544893	2382530	824850
COLO 829	crizotinib	72	10.01	2241020	2382530	824850
COLO 829	crizotinib	72	31.65	2137913	2382530	824850
COLO 829	crizotinib	72	100.07	2226500	2382530	824850
COLO 829	crizotinib	72	316.46	2141034	2382530	824850
COLO 829	crizotinib	72	1000.72	2254374	2382530	824850
COLO 829	crizotinib	72	3164.56	1468540	2382530	824850
COLO 829	crizotinib	72	10007.2	204840	2382530	824850
COLO 829	crizotinib	72	31645.6	1107	2382530	824850
Daoy	crizotinib	72	3.16	7161234	6152760	1014517
Daoy	crizotinib	72	10.01	6452893	6152760	1014517
Daoy	crizotinib	72	31.65	6711074	6152760	1014517
Daoy	crizotinib	72	100.07	7053633	6152760	1014517
Daoy	crizotinib	72	316.46	6556080	6152760	1014517
Daoy	crizotinib	72	1000.72	5513180	6152760	1014517
Daoy	crizotinib	72	3164.56	2616287	6152760	1014517
Daoy	crizotinib	72	10007.2	324540	6152760	1014517
Daoy	crizotinib	72	31645.6	14487	6152760	1014517
DB	crizotinib	72	3.16	2638973	2696953	507133
DB	crizotinib	72	10.01	2374580	2696953	507133
DB	crizotinib	72	31.65	2544094	2696953	507133
DB	crizotinib	72	100.07	2558787	2696953	507133
DB	crizotinib	72	316.46	2655007	2696953	507133
DB	crizotinib	72	1000.72	2738347	2696953	507133
DB	crizotinib	72	3164.56	905547	2696953	507133
DB	crizotinib	72	10007.2	27227	2696953	507133
DB	crizotinib	72	31645.6	294	2696953	507133
DLD-1	crizotinib	72	3.16	13486094	12754597	1346813
DLD-1	crizotinib	72	10.01	12236307	12754597	1346813
DLD-1	crizotinib	72	31.65	13208913	12754597	1346813
DLD-1	crizotinib	72	100.07	12524060	12754597	1346813
DLD-1	crizotinib	72	316.46	13500014	12754597	1346813
DLD-1	crizotinib	72	1000.72	13613140	12754597	1346813
DLD-1	crizotinib	72	3164.56	9877727	12754597	1346813
DLD-1	crizotinib	72	10007.2	1482694	12754597	1346813
DLD-1	crizotinib	72	31645.6	24287	12754597	1346813
DOHH-2	crizotinib	72	3.16	7896660	8591597	1688067
DOHH-2	crizotinib	72	9.99	8304034	8591597	1688067
DOHH-2	crizotinib	72	31.6	7575387	8591597	1688067
DOHH-2	crizotinib	72	99.93	8489454	8591597	1688067
DOHH-2	crizotinib	72	316	8448334	8591597	1688067
DOHH-2	crizotinib	72	999.28	6525307	8591597	1688067
DOHH-2	crizotinib	72	3160	206567	8591597	1688067
DOHH-2	crizotinib	72	9992.8	3494	8591597	1688067
DOHH-2	crizotinib	72	31600	23467	8591597	1688067
DoTc2 4510	crizotinib	72	3.16	1318580	1286077	344527
DoTc2 4510	crizotinib	72	10.01	1304500	1286077	344527
DoTc2 4510	crizotinib	72	31.65	1118374	1286077	344527
DoTc2 4510	crizotinib	72	100.07	1198654	1286077	344527
DoTc2 4510	crizotinib	72	316.46	1200827	1286077	344527
DoTc2 4510	crizotinib	72	1000.72	924167	1286077	344527
DoTc2 4510	crizotinib	72	3164.56	425647	1286077	344527
DoTc2 4510	crizotinib	72	10007.2	1620	1286077	344527
DoTc2 4510	crizotinib	72	31645.6	274	1286077	344527
DU 145	crizotinib	72	3.16	5050254	4825680	773200
DU 145	crizotinib	72	10.01	4908340	4825680	773200
DU 145	crizotinib	72	31.65	4860947	4825680	773200
DU 145	crizotinib	72	100.07	4994553	4825680	773200
DU 145	crizotinib	72	316.46	5188320	4825680	773200
DU 145	crizotinib	72	1000.72	4591180	4825680	773200
DU 145	crizotinib	72	3164.56	2545347	4825680	773200
DU 145	crizotinib	72	10007.2	730680	4825680	773200
DU 145	crizotinib	72	31645.6	19820	4825680	773200
DU4475	crizotinib	72	3.16	7220307	7022257	1827877
DU4475	crizotinib	72	10.01	7427887	7022257	1827877
DU4475	crizotinib	72	31.65	7413873	7022257	1827877
DU4475	crizotinib	72	100.07	6951367	7022257	1827877
DU4475	crizotinib	72	316.46	6815380	7022257	1827877
DU4475	crizotinib	72	1000.72	6843100	7022257	1827877
DU4475	crizotinib	72	3164.56	993847	7022257	1827877
DU4475	crizotinib	72	10007.2	11600	7022257	1827877
DU4475	crizotinib	72	31645.6	2314	7022257	1827877
ES-2	crizotinib	72	3.16	2614194	2433853	143603
ES-2	crizotinib	72	10.01	2271940	2433853	143603
ES-2	crizotinib	72	31.65	2313694	2433853	143603
ES-2	crizotinib	72	100.07	2112613	2433853	143603
ES-2	crizotinib	72	316.46	2823960	2433853	143603
ES-2	crizotinib	72	1000.72	2608867	2433853	143603
ES-2	crizotinib	72	3164.56	628180	2433853	143603
ES-2	crizotinib	72	10007.2	77154	2433853	143603
ES-2	crizotinib	72	31645.6	9654	2433853	143603
FaDu	crizotinib	72	3.16	2259840	2517357	450693
FaDu	crizotinib	72	10.01	2364520	2517357	450693
FaDu	crizotinib	72	31.65	2285714	2517357	450693
FaDu	crizotinib	72	100.07	2256733	2517357	450693
FaDu	crizotinib	72	316.46	2543267	2517357	450693
FaDu	crizotinib	72	1000.72	2369840	2517357	450693
FaDu	crizotinib	72	3164.56	1439067	2517357	450693
FaDu	crizotinib	72	10007.2	432360	2517357	450693
FaDu	crizotinib	72	31645.6	17654	2517357	450693
G-361	crizotinib	72	3.16	2477840	2463760	691930
G-361	crizotinib	72	10.01	2123547	2463760	691930
G-361	crizotinib	72	31.65	2551327	2463760	691930
G-361	crizotinib	72	100.07	2502840	2463760	691930
G-361	crizotinib	72	316.46	2421600	2463760	691930
G-361	crizotinib	72	1000.72	2431660	2463760	691930
G-361	crizotinib	72	3164.56	1378320	2463760	691930
G-361	crizotinib	72	10007.2	14200	2463760	691930
G-361	crizotinib	72	31645.6	13100	2463760	691930
HCT 116	crizotinib	72	3.16	3914167	4139667	308953
HCT 116	crizotinib	72	10.01	4239307	4139667	308953
HCT 116	crizotinib	72	31.65	3964800	4139667	308953
HCT 116	crizotinib	72	100.07	3674234	4139667	308953
HCT 116	crizotinib	72	316.46	4554287	4139667	308953
HCT 116	crizotinib	72	1000.72	2739034	4139667	308953
HCT 116	crizotinib	72	3164.56	1279414	4139667	308953
HCT 116	crizotinib	72	10007.2	21594	4139667	308953
HCT 116	crizotinib	72	31645.6	47213	4139667	308953
HCT-15	crizotinib	72	3.16	9855860	8480134	743417
HCT-15	crizotinib	72	10.01	9878547	8480134	743417
HCT-15	crizotinib	72	31.65	10918107	8480134	743417
HCT-15	crizotinib	72	100.07	10111753	8480134	743417
HCT-15	crizotinib	72	316.46	10075073	8480134	743417
HCT-15	crizotinib	72	1000.72	10092000	8480134	743417
HCT-15	crizotinib	72	3164.56	6383573	8480134	743417
HCT-15	crizotinib	72	10007.2	558653	8480134	743417
HCT-15	crizotinib	72	31645.6	6987	8480134	743417
HL-60	crizotinib	72	3.16	2384540	2393060	1020670
HL-60	crizotinib	72	10.01	2358380	2393060	1020670
HL-60	crizotinib	72	31.65	2372780	2393060	1020670
HL-60	crizotinib	72	100.07	2382513	2393060	1020670
HL-60	crizotinib	72	316.46	2431867	2393060	1020670
HL-60	crizotinib	72	1000.72	1314414	2393060	1020670
HL-60	crizotinib	72	3164.56	738480	2393060	1020670
HL-60	crizotinib	72	10007.2	9007	2393060	1020670
HL-60	crizotinib	72	31645.6	380	2393060	1020670
Hs 578T	crizotinib	72	3.16	2028487	2204600	761780
Hs 578T	crizotinib	72	10.01	2054487	2204600	761780
Hs 578T	crizotinib	72	31.65	2102667	2204600	761780
Hs 578T	crizotinib	72	100.07	2024607	2204600	761780
Hs 578T	crizotinib	72	316.46	1954107	2204600	761780
Hs 578T	crizotinib	72	1000.72	1593920	2204600	761780
Hs 578T	crizotinib	72	3164.56	1279733	2204600	761780
Hs 578T	crizotinib	72	10007.2	70380	2204600	761780
Hs 578T	crizotinib	72	31645.6	347	2204600	761780
Hs 746T	crizotinib	72	3.16	1465674	1557957	526820
Hs 746T	crizotinib	72	10.01	1293287	1557957	526820
Hs 746T	crizotinib	72	31.65	653807	1557957	526820
Hs 746T	crizotinib	72	100.07	591034	1557957	526820
Hs 746T	crizotinib	72	316.46	597667	1557957	526820
Hs 746T	crizotinib	72	1000.72	604927	1557957	526820
Hs 746T	crizotinib	72	3164.56	207420	1557957	526820
Hs 746T	crizotinib	72	10007.2	32694	1557957	526820
Hs 746T	crizotinib	72	31645.6	347	1557957	526820
Hs 766T	crizotinib	72	3.16	1053647	1106560	348703
Hs 766T	crizotinib	72	10.01	1102320	1106560	348703
Hs 766T	crizotinib	72	31.65	1200207	1106560	348703
Hs 766T	crizotinib	72	100.07	1115320	1106560	348703
Hs 766T	crizotinib	72	316.46	1177247	1106560	348703
Hs 766T	crizotinib	72	1000.72	1150160	1106560	348703
Hs 766T	crizotinib	72	3164.56	752527	1106560	348703
Hs 766T	crizotinib	72	10007.2	28794	1106560	348703
Hs 766T	crizotinib	72	31645.6	12360	1106560	348703
HT	crizotinib	72	3.16	5854760	5772333	1115720
HT	crizotinib	72	10.01	5773094	5772333	1115720
HT	crizotinib	72	31.65	5887914	5772333	1115720
HT	crizotinib	72	100.07	5311134	5772333	1115720
HT	crizotinib	72	316.46	5592587	5772333	1115720
HT	crizotinib	72	1000.72	4781520	5772333	1115720
HT	crizotinib	72	3164.56	3061107	5772333	1115720
HT	crizotinib	72	10007.2	36114	5772333	1115720
HT	crizotinib	72	31645.6	17374	5772333	1115720
HT-1080	crizotinib	72	3.16	2753694	3574583	122844
HT-1080	crizotinib	72	10.01	2835027	3574583	122844
HT-1080	crizotinib	72	31.65	3356907	3574583	122844
HT-1080	crizotinib	72	100.07	3162247	3574583	122844
HT-1080	crizotinib	72	316.46	3367254	3574583	122844
HT-1080	crizotinib	72	1000.72	2156107	3574583	122844
HT-1080	crizotinib	72	3164.56	552234	3574583	122844
HT-1080	crizotinib	72	10007.2	9767	3574583	122844
HT-1080	crizotinib	72	31645.6	27334	3574583	122844
HuTu 80	crizotinib	72	3.16	6229733	6429690	564460
HuTu 80	crizotinib	72	10.01	7141927	6429690	564460
HuTu 80	crizotinib	72	31.65	6833140	6429690	564460
HuTu 80	crizotinib	72	100.07	6108160	6429690	564460
HuTu 80	crizotinib	72	316.46	5801987	6429690	564460
HuTu 80	crizotinib	72	1000.72	2638334	6429690	564460
HuTu 80	crizotinib	72	3164.56	813460	6429690	564460
HuTu 80	crizotinib	72	10007.2	22114	6429690	564460
HuTu 80	crizotinib	72	31645.6	4507	6429690	564460
J82	crizotinib	72	3.16	3453094	3402764	852727
J82	crizotinib	72	10.01	3702234	3402764	852727
J82	crizotinib	72	31.65	3573987	3402764	852727
J82	crizotinib	72	100.07	3544840	3402764	852727
J82	crizotinib	72	316.46	3365980	3402764	852727
J82	crizotinib	72	1000.72	3110160	3402764	852727
J82	crizotinib	72	3164.56	2399713	3402764	852727
J82	crizotinib	72	10007.2	899227	3402764	852727
J82	crizotinib	72	31645.6	16587	3402764	852727
JAR	crizotinib	72	3.16	4456160	5178167	354333
JAR	crizotinib	72	10.01	5122900	5178167	354333
JAR	crizotinib	72	31.65	5696614	5178167	354333
JAR	crizotinib	72	100.07	4927440	5178167	354333
JAR	crizotinib	72	316.46	4978894	5178167	354333
JAR	crizotinib	72	1000.72	3454440	5178167	354333
JAR	crizotinib	72	3164.56	611120	5178167	354333
JAR	crizotinib	72	10007.2	9353	5178167	354333
JAR	crizotinib	72	31645.6	26773	5178167	354333
JM-1	crizotinib	72	3.16	2125767	2256624	458297
JM-1	crizotinib	72	9.99	2124054	2256624	458297
JM-1	crizotinib	72	31.6	2064573	2256624	458297
JM-1	crizotinib	72	99.93	2080293	2256624	458297
JM-1	crizotinib	72	316	2019707	2256624	458297
JM-1	crizotinib	72	999.28	1640260	2256624	458297
JM-1	crizotinib	72	3160	440094	2256624	458297
JM-1	crizotinib	72	9992.8	153674	2256624	458297
JM-1	crizotinib	72	31600	8500	2256624	458297
Jurkat E6-1	crizotinib	72	3.16	3144480	3156593	549980
Jurkat E6-1	crizotinib	72	10.01	3163640	3156593	549980
Jurkat E6-1	crizotinib	72	31.65	3199214	3156593	549980
Jurkat E6-1	crizotinib	72	100.07	3120960	3156593	549980
Jurkat E6-1	crizotinib	72	316.46	3001807	3156593	549980
Jurkat E6-1	crizotinib	72	1000.72	1730167	3156593	549980
Jurkat E6-1	crizotinib	72	3164.56	942647	3156593	549980
Jurkat E6-1	crizotinib	72	10007.2	10933	3156593	549980
Jurkat E6-1	crizotinib	72	31645.6	8347	3156593	549980
K-562	crizotinib	72	3.16	10322707	10411624	864553
K-562	crizotinib	72	10.01	10318727	10411624	864553
K-562	crizotinib	72	31.65	10295387	10411624	864553
K-562	crizotinib	72	100.07	8755407	10411624	864553
K-562	crizotinib	72	316.46	4868107	10411624	864553
K-562	crizotinib	72	1000.72	573960	10411624	864553
K-562	crizotinib	72	3164.56	15767	10411624	864553
K-562	crizotinib	72	10007.2	4280	10411624	864553
K-562	crizotinib	72	31645.6	2514	10411624	864553
KATO III	crizotinib	72	3.16	2555253	2504857	594037
KATO III	crizotinib	72	10.01	2626454	2504857	594037
KATO III	crizotinib	72	31.65	2545453	2504857	594037
KATO III	crizotinib	72	100.07	2512300	2504857	594037
KATO III	crizotinib	72	316.46	2424660	2504857	594037
KATO III	crizotinib	72	1000.72	1715534	2504857	594037
KATO III	crizotinib	72	3164.56	1087954	2504857	594037
KATO III	crizotinib	72	10007.2	16074	2504857	594037
KATO III	crizotinib	72	31645.6	760	2504857	594037
KG-1	crizotinib	72	3.16	2366500	2271944	959150
KG-1	crizotinib	72	10.01	2284420	2271944	959150
KG-1	crizotinib	72	31.65	2250814	2271944	959150
KG-1	crizotinib	72	100.07	2287160	2271944	959150
KG-1	crizotinib	72	316.46	2229020	2271944	959150
KG-1	crizotinib	72	1000.72	1038460	2271944	959150
KG-1	crizotinib	72	3164.56	968593	2271944	959150
KG-1	crizotinib	72	10007.2	209840	2271944	959150
KG-1	crizotinib	72	31645.6	894	2271944	959150
KLE	crizotinib	72	3.16	2853220	2855910	1572277
KLE	crizotinib	72	10.01	2877333	2855910	1572277
KLE	crizotinib	72	31.65	2711400	2855910	1572277
KLE	crizotinib	72	100.07	2842720	2855910	1572277
KLE	crizotinib	72	316.46	3246274	2855910	1572277
KLE	crizotinib	72	1000.72	3456573	2855910	1572277
KLE	crizotinib	72	3164.56	2972500	2855910	1572277
KLE	crizotinib	72	10007.2	1400674	2855910	1572277
KLE	crizotinib	72	31645.6	43673	2855910	1572277
KU812	crizotinib	72	3.16	1755180	1808063	732850
KU812	crizotinib	72	10.01	1854960	1808063	732850
KU812	crizotinib	72	31.65	1671514	1808063	732850
KU812	crizotinib	72	100.07	1339200	1808063	732850
KU812	crizotinib	72	316.46	913954	1808063	732850
KU812	crizotinib	72	1000.72	24267	1808063	732850
KU812	crizotinib	72	3164.56	4320	1808063	732850
KU812	crizotinib	72	10007.2	1194	1808063	732850
KU812	crizotinib	72	31645.6	9027	1808063	732850
LNCaP FGC	crizotinib	72	3.16	3046434	2896180	1348250
LNCaP FGC	crizotinib	72	10.01	2970094	2896180	1348250
LNCaP FGC	crizotinib	72	31.65	2924067	2896180	1348250
LNCaP FGC	crizotinib	72	100.07	2968067	2896180	1348250
LNCaP FGC	crizotinib	72	316.46	2954253	2896180	1348250
LNCaP FGC	crizotinib	72	1000.72	2843413	2896180	1348250
LNCaP FGC	crizotinib	72	3164.56	2070407	2896180	1348250
LNCaP FGC	crizotinib	72	10007.2	1203087	2896180	1348250
LNCaP FGC	crizotinib	72	31645.6	4454	2896180	1348250
LoVo	crizotinib	72	3.16	2032847	2216307	373873
LoVo	crizotinib	72	10.01	2109334	2216307	373873
LoVo	crizotinib	72	31.65	1997574	2216307	373873
LoVo	crizotinib	72	100.07	1820347	2216307	373873
LoVo	crizotinib	72	316.46	1919180	2216307	373873
LoVo	crizotinib	72	1000.72	1187667	2216307	373873
LoVo	crizotinib	72	3164.56	537787	2216307	373873
LoVo	crizotinib	72	10007.2	78507	2216307	373873
LoVo	crizotinib	72	31645.6	954	2216307	373873
LS 174T	crizotinib	72	3.16	1094027	991430	105427
LS 174T	crizotinib	72	10.01	1011407	991430	105427
LS 174T	crizotinib	72	31.65	1056133	991430	105427
LS 174T	crizotinib	72	100.07	985114	991430	105427
LS 174T	crizotinib	72	316.46	1083720	991430	105427
LS 174T	crizotinib	72	1000.72	597367	991430	105427
LS 174T	crizotinib	72	3164.56	334207	991430	105427
LS 174T	crizotinib	72	10007.2	29614	991430	105427
LS 174T	crizotinib	72	31645.6	14273	991430	105427
LS411N	crizotinib	72	3.16	5234500	5400803	859887
LS411N	crizotinib	72	10.01	5505200	5400803	859887
LS411N	crizotinib	72	31.65	5343780	5400803	859887
LS411N	crizotinib	72	100.07	5560654	5400803	859887
LS411N	crizotinib	72	316.46	5088680	5400803	859887
LS411N	crizotinib	72	1000.72	4531434	5400803	859887
LS411N	crizotinib	72	3164.56	2097374	5400803	859887
LS411N	crizotinib	72	10007.2	160967	5400803	859887
LS411N	crizotinib	72	31645.6	1120	5400803	859887
MCF7	crizotinib	72	3.16	6109214	5549320	2765030
MCF7	crizotinib	72	10.01	5836247	5549320	2765030
MCF7	crizotinib	72	31.65	5504707	5549320	2765030
MCF7	crizotinib	72	100.07	5727800	5549320	2765030
MCF7	crizotinib	72	316.46	5842840	5549320	2765030
MCF7	crizotinib	72	1000.72	5585233	5549320	2765030
MCF7	crizotinib	72	3164.56	3687594	5549320	2765030
MCF7	crizotinib	72	10007.2	194574	5549320	2765030
MCF7	crizotinib	72	31645.6	5180	5549320	2765030
MDA-MB-231	crizotinib	72	3.16	2011520	2059077	137453
MDA-MB-231	crizotinib	72	9.99	2068114	2059077	137453
MDA-MB-231	crizotinib	72	31.6	2034120	2059077	137453
MDA-MB-231	crizotinib	72	99.93	1895234	2059077	137453
MDA-MB-231	crizotinib	72	316	1899820	2059077	137453
MDA-MB-231	crizotinib	72	999.28	1817080	2059077	137453
MDA-MB-231	crizotinib	72	3160	1344600	2059077	137453
MDA-MB-231	crizotinib	72	9992.8	222747	2059077	137453
MDA-MB-231	crizotinib	72	31600	10860	2059077	137453
MeWo	crizotinib	72	3.16	2316087	2377914	702493
MeWo	crizotinib	72	10.01	2263187	2377914	702493
MeWo	crizotinib	72	31.65	2406220	2377914	702493
MeWo	crizotinib	72	100.07	2308213	2377914	702493
MeWo	crizotinib	72	316.46	2466107	2377914	702493
MeWo	crizotinib	72	1000.72	2186720	2377914	702493
MeWo	crizotinib	72	3164.56	1406874	2377914	702493
MeWo	crizotinib	72	10007.2	53620	2377914	702493
MeWo	crizotinib	72	31645.6	594	2377914	702493
MG-63	crizotinib	72	3.16	8291474	7595220	1422180
MG-63	crizotinib	72	10.01	7748887	7595220	1422180
MG-63	crizotinib	72	31.65	8491660	7595220	1422180
MG-63	crizotinib	72	100.07	7507913	7595220	1422180
MG-63	crizotinib	72	316.46	7063267	7595220	1422180
MG-63	crizotinib	72	1000.72	7750020	7595220	1422180
MG-63	crizotinib	72	3164.56	2375800	7595220	1422180
MG-63	crizotinib	72	10007.2	155700	7595220	1422180
MG-63	crizotinib	72	31645.6	1067	7595220	1422180
MIA PaCa-2	crizotinib	72	3.16	13995634	12367367	1655053
MIA PaCa-2	crizotinib	72	10.01	12332447	12367367	1655053
MIA PaCa-2	crizotinib	72	31.65	12424994	12367367	1655053
MIA PaCa-2	crizotinib	72	100.07	11502367	12367367	1655053
MIA PaCa-2	crizotinib	72	316.46	12288313	12367367	1655053
MIA PaCa-2	crizotinib	72	1000.72	8095587	12367367	1655053
MIA PaCa-2	crizotinib	72	3164.56	3995880	12367367	1655053
MIA PaCa-2	crizotinib	72	10007.2	61033	12367367	1655053
MIA PaCa-2	crizotinib	72	31645.6	5200	12367367	1655053
MOLT-4	crizotinib	72	3.16	1947040	2039407	251127
MOLT-4	crizotinib	72	10.01	2105533	2039407	251127
MOLT-4	crizotinib	72	31.65	2065654	2039407	251127
MOLT-4	crizotinib	72	100.07	2031747	2039407	251127
MOLT-4	crizotinib	72	316.46	2021247	2039407	251127
MOLT-4	crizotinib	72	1000.72	145020	2039407	251127
MOLT-4	crizotinib	72	3164.56	51347	2039407	251127
MOLT-4	crizotinib	72	10007.2	1333	2039407	251127
MOLT-4	crizotinib	72	31645.6	187	2039407	251127
NCCIT	crizotinib	72	3.16	3212013	2706190	362507
NCCIT	crizotinib	72	10.01	3021000	2706190	362507
NCCIT	crizotinib	72	31.65	2761307	2706190	362507
NCCIT	crizotinib	72	100.07	2878400	2706190	362507
NCCIT	crizotinib	72	316.46	2621653	2706190	362507
NCCIT	crizotinib	72	1000.72	2074007	2706190	362507
NCCIT	crizotinib	72	3164.56	486780	2706190	362507
NCCIT	crizotinib	72	10007.2	15920	2706190	362507
NCCIT	crizotinib	72	31645.6	640	2706190	362507
NCI-H460	crizotinib	72	3.16	13880340	13773180	777447
NCI-H460	crizotinib	72	10.01	13371020	13773180	777447
NCI-H460	crizotinib	72	31.65	13861160	13773180	777447
NCI-H460	crizotinib	72	100.07	14140147	13773180	777447
NCI-H460	crizotinib	72	316.46	13819413	13773180	777447
NCI-H460	crizotinib	72	1000.72	12175367	13773180	777447
NCI-H460	crizotinib	72	3164.56	5188107	13773180	777447
NCI-H460	crizotinib	72	10007.2	177560	13773180	777447
NCI-H460	crizotinib	72	31645.6	954	13773180	777447
NCI-H661	crizotinib	72	3.16	1110234	901393	504730
NCI-H661	crizotinib	72	10.01	968214	901393	504730
NCI-H661	crizotinib	72	31.65	828707	901393	504730
NCI-H661	crizotinib	72	100.07	1538034	901393	504730
NCI-H661	crizotinib	72	316.46	949700	901393	504730
NCI-H661	crizotinib	72	1000.72	779247	901393	504730
NCI-H661	crizotinib	72	3164.56	1066767	901393	504730
NCI-H661	crizotinib	72	10007.2	53774	901393	504730
NCI-H661	crizotinib	72	31645.6	867	901393	504730
NCI-H82	crizotinib	72	3.16	8080647	8254307	798457
NCI-H82	crizotinib	72	10.01	7321100	8254307	798457
NCI-H82	crizotinib	72	31.65	8502887	8254307	798457
NCI-H82	crizotinib	72	100.07	8281827	8254307	798457
NCI-H82	crizotinib	72	316.46	7869047	8254307	798457
NCI-H82	crizotinib	72	1000.72	5073387	8254307	798457
NCI-H82	crizotinib	72	3164.56	2498220	8254307	798457
NCI-H82	crizotinib	72	10007.2	17620	8254307	798457
NCI-H82	crizotinib	72	31645.6	493	8254307	798457
OVCAR-3	crizotinib	72	3.16	7596174	6447274	3624850
OVCAR-3	crizotinib	72	10.01	6873213	6447274	3624850
OVCAR-3	crizotinib	72	31.65	7442920	6447274	3624850
OVCAR-3	crizotinib	72	100.07	6906180	6447274	3624850
OVCAR-3	crizotinib	72	316.46	7536727	6447274	3624850
OVCAR-3	crizotinib	72	1000.72	7163040	6447274	3624850
OVCAR-3	crizotinib	72	3164.56	6809860	6447274	3624850
OVCAR-3	crizotinib	72	10007.2	1891180	6447274	3624850
OVCAR-3	crizotinib	72	31645.6	19187	6447274	3624850
PA-1	crizotinib	72	3.16	1118920	1112024	193660
PA-1	crizotinib	72	10.01	1040393	1112024	193660
PA-1	crizotinib	72	31.65	1033207	1112024	193660
PA-1	crizotinib	72	100.07	1024713	1112024	193660
PA-1	crizotinib	72	316.46	978627	1112024	193660
PA-1	crizotinib	72	1000.72	376480	1112024	193660
PA-1	crizotinib	72	3164.56	48880	1112024	193660
PA-1	crizotinib	72	10007.2	800	1112024	193660
PA-1	crizotinib	72	31645.6	154	1112024	193660
PC-3	crizotinib	72	3.16	6392320	6327584	1246050
PC-3	crizotinib	72	10.01	6461400	6327584	1246050
PC-3	crizotinib	72	31.65	6162060	6327584	1246050
PC-3	crizotinib	72	100.07	6292414	6327584	1246050
PC-3	crizotinib	72	316.46	6443993	6327584	1246050
PC-3	crizotinib	72	1000.72	5951960	6327584	1246050
PC-3	crizotinib	72	3164.56	2832813	6327584	1246050
PC-3	crizotinib	72	10007.2	928000	6327584	1246050
PC-3	crizotinib	72	31645.6	38327	6327584	1246050
PFSK-1	crizotinib	72	3.16	3272340	3078237	575350
PFSK-1	crizotinib	72	10.01	3344880	3078237	575350
PFSK-1	crizotinib	72	31.65	3178914	3078237	575350
PFSK-1	crizotinib	72	100.07	3038214	3078237	575350
PFSK-1	crizotinib	72	316.46	3162527	3078237	575350
PFSK-1	crizotinib	72	1000.72	2621147	3078237	575350
PFSK-1	crizotinib	72	3164.56	1052280	3078237	575350
PFSK-1	crizotinib	72	10007.2	18327	3078237	575350
PFSK-1	crizotinib	72	31645.6	17880	3078237	575350
RD	crizotinib	72	3.16	1476767	1597340	291390
RD	crizotinib	72	10.01	1458840	1597340	291390
RD	crizotinib	72	31.65	1523527	1597340	291390
RD	crizotinib	72	100.07	1479847	1597340	291390
RD	crizotinib	72	316.46	1469980	1597340	291390
RD	crizotinib	72	1000.72	1223213	1597340	291390
RD	crizotinib	72	3164.56	529907	1597340	291390
RD	crizotinib	72	10007.2	3554	1597340	291390
RD	crizotinib	72	31645.6	6413	1597340	291390
RKO	crizotinib	72	3.16	3546953	3370547	289740
RKO	crizotinib	72	10.01	2847300	3370547	289740
RKO	crizotinib	72	31.65	3070394	3370547	289740
RKO	crizotinib	72	100.07	3127294	3370547	289740
RKO	crizotinib	72	316.46	3355327	3370547	289740
RKO	crizotinib	72	1000.72	2947140	3370547	289740
RKO	crizotinib	72	3164.56	391660	3370547	289740
RKO	crizotinib	72	10007.2	24140	3370547	289740
RKO	crizotinib	72	31645.6	400	3370547	289740
RL	crizotinib	72	3.16	11795280	9941963	1041000
RL	crizotinib	72	10.01	10072733	9941963	1041000
RL	crizotinib	72	31.65	9324520	9941963	1041000
RL	crizotinib	72	100.07	9749894	9941963	1041000
RL	crizotinib	72	316.46	8907200	9941963	1041000
RL	crizotinib	72	1000.72	8084227	9941963	1041000
RL	crizotinib	72	3164.56	4870834	9941963	1041000
RL	crizotinib	72	10007.2	61420	9941963	1041000
RL	crizotinib	72	31645.6	7280	9941963	1041000
RL95-2	crizotinib	72	3.16	2446080	2335040	822320
RL95-2	crizotinib	72	10.01	2295307	2335040	822320
RL95-2	crizotinib	72	31.65	2363500	2335040	822320
RL95-2	crizotinib	72	100.07	2190607	2335040	822320
RL95-2	crizotinib	72	316.46	2047160	2335040	822320
RL95-2	crizotinib	72	1000.72	1243587	2335040	822320
RL95-2	crizotinib	72	3164.56	780727	2335040	822320
RL95-2	crizotinib	72	10007.2	12167	2335040	822320
RL95-2	crizotinib	72	31645.6	780	2335040	822320
RPMI-7951	crizotinib	72	3.16	2620387	2662743	395397
RPMI-7951	crizotinib	72	10.01	2680787	2662743	395397
RPMI-7951	crizotinib	72	31.65	2993274	2662743	395397
RPMI-7951	crizotinib	72	100.07	2867053	2662743	395397
RPMI-7951	crizotinib	72	316.46	2583527	2662743	395397
RPMI-7951	crizotinib	72	1000.72	2436247	2662743	395397
RPMI-7951	crizotinib	72	3164.56	673720	2662743	395397
RPMI-7951	crizotinib	72	10007.2	5567	2662743	395397
RPMI-7951	crizotinib	72	31645.6	207	2662743	395397
RS4-11	crizotinib	72	3.16	2633560	2352727	719217
RS4-11	crizotinib	72	10.01	2405660	2352727	719217
RS4-11	crizotinib	72	31.65	2446907	2352727	719217
RS4-11	crizotinib	72	100.07	2393453	2352727	719217
RS4-11	crizotinib	72	316.46	2327987	2352727	719217
RS4-11	crizotinib	72	1000.72	887940	2352727	719217
RS4-11	crizotinib	72	3164.56	272094	2352727	719217
RS4-11	crizotinib	72	10007.2	85947	2352727	719217
RS4-11	crizotinib	72	31645.6	9294	2352727	719217
RT4	crizotinib	72	3.16	6980227	7532830	2522870
RT4	crizotinib	72	10.01	7668380	7532830	2522870
RT4	crizotinib	72	31.65	7587340	7532830	2522870
RT4	crizotinib	72	100.07	7425854	7532830	2522870
RT4	crizotinib	72	316.46	6717040	7532830	2522870
RT4	crizotinib	72	1000.72	6512327	7532830	2522870
RT4	crizotinib	72	3164.56	4144860	7532830	2522870
RT4	crizotinib	72	10007.2	905680	7532830	2522870
RT4	crizotinib	72	31645.6	13260	7532830	2522870
SHP-77	crizotinib	72	3.16	3384860	3120553	700483
SHP-77	crizotinib	72	10.01	2910907	3120553	700483
SHP-77	crizotinib	72	31.65	3761867	3120553	700483
SHP-77	crizotinib	72	100.07	3027487	3120553	700483
SHP-77	crizotinib	72	316.46	3402340	3120553	700483
SHP-77	crizotinib	72	1000.72	3393700	3120553	700483
SHP-77	crizotinib	72	3164.56	2011534	3120553	700483
SHP-77	crizotinib	72	10007.2	88327	3120553	700483
SHP-77	crizotinib	72	31645.6	45260	3120553	700483
SJCRH30	crizotinib	72	3.16	3209607	2986757	682950
SJCRH30	crizotinib	72	10.01	2888707	2986757	682950
SJCRH30	crizotinib	72	31.65	3416667	2986757	682950
SJCRH30	crizotinib	72	100.07	2832580	2986757	682950
SJCRH30	crizotinib	72	316.46	3173487	2986757	682950
SJCRH30	crizotinib	72	1000.72	2311567	2986757	682950
SJCRH30	crizotinib	72	3164.56	503493	2986757	682950
SJCRH30	crizotinib	72	10007.2	3500	2986757	682950
SJCRH30	crizotinib	72	31645.6	3834	2986757	682950
SK-N-AS	crizotinib	72	3.16	1825720	1912637	563007
SK-N-AS	crizotinib	72	10.01	1971747	1912637	563007
SK-N-AS	crizotinib	72	31.65	2021374	1912637	563007
SK-N-AS	crizotinib	72	100.07	2198907	1912637	563007
SK-N-AS	crizotinib	72	316.46	1834313	1912637	563007
SK-N-AS	crizotinib	72	1000.72	1418720	1912637	563007
SK-N-AS	crizotinib	72	3164.56	647527	1912637	563007
SK-N-AS	crizotinib	72	10007.2	34440	1912637	563007
SK-N-AS	crizotinib	72	31645.6	6773	1912637	563007
SK-N-FI	crizotinib	72	3.16	1517794	1362440	556060
SK-N-FI	crizotinib	72	10.01	1292214	1362440	556060
SK-N-FI	crizotinib	72	31.65	1539080	1362440	556060
SK-N-FI	crizotinib	72	100.07	1486580	1362440	556060
SK-N-FI	crizotinib	72	316.46	1449693	1362440	556060
SK-N-FI	crizotinib	72	1000.72	1215274	1362440	556060
SK-N-FI	crizotinib	72	3164.56	460587	1362440	556060
SK-N-FI	crizotinib	72	10007.2	2407	1362440	556060
SK-N-FI	crizotinib	72	31645.6	4547	1362440	556060
SNU-5	crizotinib	72	3.16	3867214	4152087	1486974
SNU-5	crizotinib	72	10.01	2800614	4152087	1486974
SNU-5	crizotinib	72	31.65	813660	4152087	1486974
SNU-5	crizotinib	72	100.07	791640	4152087	1486974
SNU-5	crizotinib	72	316.46	813907	4152087	1486974
SNU-5	crizotinib	72	1000.72	882007	4152087	1486974
SNU-5	crizotinib	72	3164.56	616034	4152087	1486974
SNU-5	crizotinib	72	10007.2	91814	4152087	1486974
SNU-5	crizotinib	72	31645.6	1367	4152087	1486974
SNU-C2B	crizotinib	72	3.16	960914	965747	377560
SNU-C2B	crizotinib	72	10.01	979634	965747	377560
SNU-C2B	crizotinib	72	31.65	929134	965747	377560
SNU-C2B	crizotinib	72	100.07	907067	965747	377560
SNU-C2B	crizotinib	72	316.46	932094	965747	377560
SNU-C2B	crizotinib	72	1000.72	817867	965747	377560
SNU-C2B	crizotinib	72	3164.56	652774	965747	377560
SNU-C2B	crizotinib	72	10007.2	201540	965747	377560
SNU-C2B	crizotinib	72	31645.6	31327	965747	377560
SR	crizotinib	72	3.16	2409487	2420620	624307
SR	crizotinib	72	10.01	2639467	2420620	624307
SR	crizotinib	72	31.65	2702333	2420620	624307
SR	crizotinib	72	100.07	2400527	2420620	624307
SR	crizotinib	72	316.46	330447	2420620	624307
SR	crizotinib	72	1000.72	8194	2420620	624307
SR	crizotinib	72	3164.56	354	2420620	624307
SR	crizotinib	72	10007.2	247	2420620	624307
SR	crizotinib	72	31645.6	314	2420620	624307
SU-DHL-1	crizotinib	72	3.16	9178280	8437420	568773
SU-DHL-1	crizotinib	72	10.01	9258340	8437420	568773
SU-DHL-1	crizotinib	72	31.65	8926640	8437420	568773
SU-DHL-1	crizotinib	72	100.07	8469240	8437420	568773
SU-DHL-1	crizotinib	72	316.46	773100	8437420	568773
SU-DHL-1	crizotinib	72	1000.72	6700	8437420	568773
SU-DHL-1	crizotinib	72	3164.56	1574	8437420	568773
SU-DHL-1	crizotinib	72	10007.2	307	8437420	568773
SU-DHL-1	crizotinib	72	31645.6	300	8437420	568773
SU-DHL-5	crizotinib	72	3.16	9942407	10338613	836930
SU-DHL-5	crizotinib	72	9.99	9857373	10338613	836930
SU-DHL-5	crizotinib	72	31.6	9510940	10338613	836930
SU-DHL-5	crizotinib	72	99.93	10645813	10338613	836930
SU-DHL-5	crizotinib	72	316	9726627	10338613	836930
SU-DHL-5	crizotinib	72	999.28	8134214	10338613	836930
SU-DHL-5	crizotinib	72	3160	93840	10338613	836930
SU-DHL-5	crizotinib	72	9992.8	5960	10338613	836930
SU-DHL-5	crizotinib	72	31600	29987	10338613	836930
SU-DHL-6	crizotinib	72	3.16	2342987	2311980	612990
SU-DHL-6	crizotinib	72	10.01	2181460	2311980	612990
SU-DHL-6	crizotinib	72	31.65	2310200	2311980	612990
SU-DHL-6	crizotinib	72	100.07	2108433	2311980	612990
SU-DHL-6	crizotinib	72	316.46	2295247	2311980	612990
SU-DHL-6	crizotinib	72	1000.72	1938507	2311980	612990
SU-DHL-6	crizotinib	72	3164.56	664000	2311980	612990
SU-DHL-6	crizotinib	72	10007.2	11047	2311980	612990
SU-DHL-6	crizotinib	72	31645.6	307	2311980	612990
SUP-T1	crizotinib	72	3.16	3033314	2839907	500387
SUP-T1	crizotinib	72	10.01	2937854	2839907	500387
SUP-T1	crizotinib	72	31.65	2829474	2839907	500387
SUP-T1	crizotinib	72	100.07	2855047	2839907	500387
SUP-T1	crizotinib	72	316.46	2970500	2839907	500387
SUP-T1	crizotinib	72	1000.72	1697727	2839907	500387
SUP-T1	crizotinib	72	3164.56	1126367	2839907	500387
SUP-T1	crizotinib	72	10007.2	320953	2839907	500387
SUP-T1	crizotinib	72	31645.6	1374	2839907	500387
SW48	crizotinib	72	3.16	7032987	6700547	1410183
SW48	crizotinib	72	10.01	7083040	6700547	1410183
SW48	crizotinib	72	31.65	6848067	6700547	1410183
SW48	crizotinib	72	100.07	6658467	6700547	1410183
SW48	crizotinib	72	316.46	7469827	6700547	1410183
SW48	crizotinib	72	1000.72	3836514	6700547	1410183
SW48	crizotinib	72	3164.56	482493	6700547	1410183
SW48	crizotinib	72	10007.2	82833	6700547	1410183
SW48	crizotinib	72	31645.6	3807	6700547	1410183
SW480	crizotinib	72	3.16	5203874	5239040	725700
SW480	crizotinib	72	10.01	5605153	5239040	725700
SW480	crizotinib	72	31.65	5482507	5239040	725700
SW480	crizotinib	72	100.07	4901420	5239040	725700
SW480	crizotinib	72	316.46	5933300	5239040	725700
SW480	crizotinib	72	1000.72	5276827	5239040	725700
SW480	crizotinib	72	3164.56	1926514	5239040	725700
SW480	crizotinib	72	10007.2	166867	5239040	725700
SW480	crizotinib	72	31645.6	2640	5239040	725700
SW620	crizotinib	72	3.16	8856040	8824497	867170
SW620	crizotinib	72	10.01	9252487	8824497	867170
SW620	crizotinib	72	31.65	9335187	8824497	867170
SW620	crizotinib	72	100.07	8834960	8824497	867170
SW620	crizotinib	72	316.46	9177673	8824497	867170
SW620	crizotinib	72	1000.72	6280473	8824497	867170
SW620	crizotinib	72	3164.56	1037140	8824497	867170
SW620	crizotinib	72	10007.2	115354	8824497	867170
SW620	crizotinib	72	31645.6	774	8824497	867170
SW626	crizotinib	72	3.16	2732100	2779167	824557
SW626	crizotinib	72	10.01	2688860	2779167	824557
SW626	crizotinib	72	31.65	3004920	2779167	824557
SW626	crizotinib	72	100.07	2578887	2779167	824557
SW626	crizotinib	72	316.46	2318600	2779167	824557
SW626	crizotinib	72	1000.72	2511167	2779167	824557
SW626	crizotinib	72	3164.56	1230980	2779167	824557
SW626	crizotinib	72	10007.2	69174	2779167	824557
SW626	crizotinib	72	31645.6	9140	2779167	824557
SW837	crizotinib	72	3.16	3663927	3561603	926880
SW837	crizotinib	72	10.01	3743180	3561603	926880
SW837	crizotinib	72	31.65	3839827	3561603	926880
SW837	crizotinib	72	100.07	3911674	3561603	926880
SW837	crizotinib	72	316.46	3906580	3561603	926880
SW837	crizotinib	72	1000.72	3737467	3561603	926880
SW837	crizotinib	72	3164.56	2229047	3561603	926880
SW837	crizotinib	72	10007.2	751133	3561603	926880
SW837	crizotinib	72	31645.6	32947	3561603	926880
SW872	crizotinib	72	3.16	6810594	6246680	1012777
SW872	crizotinib	72	10.01	7100607	6246680	1012777
SW872	crizotinib	72	31.65	7194914	6246680	1012777
SW872	crizotinib	72	100.07	6412127	6246680	1012777
SW872	crizotinib	72	316.46	7162520	6246680	1012777
SW872	crizotinib	72	1000.72	5795893	6246680	1012777
SW872	crizotinib	72	3164.56	2276027	6246680	1012777
SW872	crizotinib	72	10007.2	210580	6246680	1012777
SW872	crizotinib	72	31645.6	8974	6246680	1012777
SW900	crizotinib	72	3.16	6113947	5265597	1029473
SW900	crizotinib	72	10.01	6284687	5265597	1029473
SW900	crizotinib	72	31.65	6017727	5265597	1029473
SW900	crizotinib	72	100.07	5966134	5265597	1029473
SW900	crizotinib	72	316.46	6231793	5265597	1029473
SW900	crizotinib	72	1000.72	4760393	5265597	1029473
SW900	crizotinib	72	3164.56	2333034	5265597	1029473
SW900	crizotinib	72	10007.2	608153	5265597	1029473
SW900	crizotinib	72	31645.6	11887	5265597	1029473
SW948	crizotinib	72	3.16	2971247	2805513	605150
SW948	crizotinib	72	10.01	2934000	2805513	605150
SW948	crizotinib	72	31.65	3233947	2805513	605150
SW948	crizotinib	72	100.07	2965233	2805513	605150
SW948	crizotinib	72	316.46	3006094	2805513	605150
SW948	crizotinib	72	1000.72	2933367	2805513	605150
SW948	crizotinib	72	3164.56	1125267	2805513	605150
SW948	crizotinib	72	10007.2	152460	2805513	605150
SW948	crizotinib	72	31645.6	23374	2805513	605150
SW982	crizotinib	72	3.16	4068627	3925573	695103
SW982	crizotinib	72	10.01	3911040	3925573	695103
SW982	crizotinib	72	31.65	3873847	3925573	695103
SW982	crizotinib	72	100.07	4023874	3925573	695103
SW982	crizotinib	72	316.46	3752027	3925573	695103
SW982	crizotinib	72	1000.72	3079987	3925573	695103
SW982	crizotinib	72	3164.56	251127	3925573	695103
SW982	crizotinib	72	10007.2	4454	3925573	695103
SW982	crizotinib	72	31645.6	18347	3925573	695103
T24	crizotinib	72	3.16	6385807	6959083	859197
T24	crizotinib	72	10.01	6445440	6959083	859197
T24	crizotinib	72	31.65	6655374	6959083	859197
T24	crizotinib	72	100.07	7798514	6959083	859197
T24	crizotinib	72	316.46	7267547	6959083	859197
T24	crizotinib	72	1000.72	6065747	6959083	859197
T24	crizotinib	72	3164.56	3203587	6959083	859197
T24	crizotinib	72	10007.2	591054	6959083	859197
T24	crizotinib	72	31645.6	13227	6959083	859197
T98G	crizotinib	72	3.16	6659347	6060490	1116507
T98G	crizotinib	72	10.01	6050207	6060490	1116507
T98G	crizotinib	72	31.65	6037574	6060490	1116507
T98G	crizotinib	72	100.07	6059434	6060490	1116507
T98G	crizotinib	72	316.46	6296654	6060490	1116507
T98G	crizotinib	72	1000.72	5776973	6060490	1116507
T98G	crizotinib	72	3164.56	3538314	6060490	1116507
T98G	crizotinib	72	10007.2	981547	6060490	1116507
T98G	crizotinib	72	31645.6	3520	6060490	1116507
TCCSUP	crizotinib	72	3.16	1443387	1462180	345283
TCCSUP	crizotinib	72	10.01	1454480	1462180	345283
TCCSUP	crizotinib	72	31.65	1574520	1462180	345283
TCCSUP	crizotinib	72	100.07	1356987	1462180	345283
TCCSUP	crizotinib	72	316.46	1350167	1462180	345283
TCCSUP	crizotinib	72	1000.72	1387527	1462180	345283
TCCSUP	crizotinib	72	3164.56	861360	1462180	345283
TCCSUP	crizotinib	72	10007.2	21387	1462180	345283
TCCSUP	crizotinib	72	31645.6	16847	1462180	345283
THP-1	crizotinib	72	3.16	8743134	7966957	3184533
THP-1	crizotinib	72	10.01	7982987	7966957	3184533
THP-1	crizotinib	72	31.65	7813274	7966957	3184533
THP-1	crizotinib	72	100.07	7749687	7966957	3184533
THP-1	crizotinib	72	316.46	8450840	7966957	3184533
THP-1	crizotinib	72	1000.72	7173394	7966957	3184533
THP-1	crizotinib	72	3164.56	6346140	7966957	3184533
THP-1	crizotinib	72	10007.2	889734	7966957	3184533
THP-1	crizotinib	72	31645.6	32267	7966957	3184533
TT	crizotinib	72	3.16	696433	735753	506450
TT	crizotinib	72	10.01	812587	735753	506450
TT	crizotinib	72	31.65	683773	735753	506450
TT	crizotinib	72	100.07	716020	735753	506450
TT	crizotinib	72	316.46	773140	735753	506450
TT	crizotinib	72	1000.72	702954	735753	506450
TT	crizotinib	72	3164.56	472780	735753	506450
TT	crizotinib	72	10007.2	13887	735753	506450
TT	crizotinib	72	31645.6	2647	735753	506450
U-118 MG	crizotinib	72	3.16	2527607	2414103	554044
U-118 MG	crizotinib	72	10.01	2659220	2414103	554044
U-118 MG	crizotinib	72	31.65	2606453	2414103	554044
U-118 MG	crizotinib	72	100.07	2255887	2414103	554044
U-118 MG	crizotinib	72	316.46	2092967	2414103	554044
U-118 MG	crizotinib	72	1000.72	2001627	2414103	554044
U-118 MG	crizotinib	72	3164.56	1657400	2414103	554044
U-118 MG	crizotinib	72	10007.2	11493	2414103	554044
U-118 MG	crizotinib	72	31645.6	7387	2414103	554044
U-2 OS	crizotinib	72	3.16	2730560	2779963	580537
U-2 OS	crizotinib	72	10.01	2632954	2779963	580537
U-2 OS	crizotinib	72	31.65	2653294	2779963	580537
U-2 OS	crizotinib	72	100.07	2907114	2779963	580537
U-2 OS	crizotinib	72	316.46	2675653	2779963	580537
U-2 OS	crizotinib	72	1000.72	2334334	2779963	580537
U-2 OS	crizotinib	72	3164.56	1468253	2779963	580537
U-2 OS	crizotinib	72	10007.2	461807	2779963	580537
U-2 OS	crizotinib	72	31645.6	15794	2779963	580537
U-87 MG	crizotinib	72	3.16	3635807	3476970	703970
U-87 MG	crizotinib	72	10.01	3011133	3476970	703970
U-87 MG	crizotinib	72	31.65	3367320	3476970	703970
U-87 MG	crizotinib	72	100.07	3044640	3476970	703970
U-87 MG	crizotinib	72	316.46	2457674	3476970	703970
U-87 MG	crizotinib	72	1000.72	2102680	3476970	703970
U-87 MG	crizotinib	72	3164.56	1965320	3476970	703970
U-87 MG	crizotinib	72	10007.2	114380	3476970	703970
U-87 MG	crizotinib	72	31645.6	8473	3476970	703970
VA-ES-BJ	crizotinib	72	3.16	2673880	2739850	691717
VA-ES-BJ	crizotinib	72	10.01	2832233	2739850	691717
VA-ES-BJ	crizotinib	72	31.65	2377613	2739850	691717
VA-ES-BJ	crizotinib	72	100.07	2100347	2739850	691717
VA-ES-BJ	crizotinib	72	316.46	2007153	2739850	691717
VA-ES-BJ	crizotinib	72	1000.72	1178920	2739850	691717
VA-ES-BJ	crizotinib	72	3164.56	764120	2739850	691717
VA-ES-BJ	crizotinib	72	10007.2	35300	2739850	691717
VA-ES-BJ	crizotinib	72	31645.6	5260	2739850	691717
5637	dabrafenib	72	1	2690660	2274167	531973
5637	dabrafenib	72	3.16	2365900	2274167	531973
5637	dabrafenib	72	10	2659400	2274167	531973
5637	dabrafenib	72	31.62	2230800	2274167	531973
5637	dabrafenib	72	100	2264647	2274167	531973
5637	dabrafenib	72	316.23	1939407	2274167	531973
5637	dabrafenib	72	1000	1713867	2274167	531973
5637	dabrafenib	72	3162.28	1001587	2274167	531973
5637	dabrafenib	72	10000	1013134	2274167	531973
769-P	dabrafenib	72	1	7149107	7432743	1425370
769-P	dabrafenib	72	3.16	7806727	7432743	1425370
769-P	dabrafenib	72	10	7014014	7432743	1425370
769-P	dabrafenib	72	31.62	7287567	7432743	1425370
769-P	dabrafenib	72	100	7325887	7432743	1425370
769-P	dabrafenib	72	316.23	7137200	7432743	1425370
769-P	dabrafenib	72	1000	5791647	7432743	1425370
769-P	dabrafenib	72	3162.28	3630613	7432743	1425370
769-P	dabrafenib	72	10000	3935727	7432743	1425370
786-O	dabrafenib	72	1	4368694	4704593	599170
786-O	dabrafenib	72	3.16	5298367	4704593	599170
786-O	dabrafenib	72	10	4734187	4704593	599170
786-O	dabrafenib	72	31.62	4333280	4704593	599170
786-O	dabrafenib	72	100	4551773	4704593	599170
786-O	dabrafenib	72	316.23	4570607	4704593	599170
786-O	dabrafenib	72	1000	4678134	4704593	599170
786-O	dabrafenib	72	3162.28	2814300	4704593	599170
786-O	dabrafenib	72	10000	3101767	4704593	599170
A-172	dabrafenib	72	1	1514787	1538753	470907
A-172	dabrafenib	72	3.16	1702300	1538753	470907
A-172	dabrafenib	72	10	1509714	1538753	470907
A-172	dabrafenib	72	31.62	1619567	1538753	470907
A-172	dabrafenib	72	100	1482147	1538753	470907
A-172	dabrafenib	72	316.23	1611374	1538753	470907
A-172	dabrafenib	72	1000	1534214	1538753	470907
A-172	dabrafenib	72	3162.28	1427513	1538753	470907
A-172	dabrafenib	72	10000	1149247	1538753	470907
A-204	dabrafenib	72	1	1275054	1178497	367653
A-204	dabrafenib	72	3.16	1084007	1178497	367653
A-204	dabrafenib	72	10	1131614	1178497	367653
A-204	dabrafenib	72	31.62	978787	1178497	367653
A-204	dabrafenib	72	100	885453	1178497	367653
A-204	dabrafenib	72	316.23	960807	1178497	367653
A-204	dabrafenib	72	1000	792640	1178497	367653
A-204	dabrafenib	72	3162.28	639553	1178497	367653
A-204	dabrafenib	72	10000	544513	1178497	367653
A375	dabrafenib	72	1	4170547	4389347	509314
A375	dabrafenib	72	3.16	4607647	4389347	509314
A375	dabrafenib	72	10	4165794	4389347	509314
A375	dabrafenib	72	31.62	3573294	4389347	509314
A375	dabrafenib	72	100	2357227	4389347	509314
A375	dabrafenib	72	316.23	1770147	4389347	509314
A375	dabrafenib	72	1000	1560874	4389347	509314
A375	dabrafenib	72	3162.28	1183307	4389347	509314
A375	dabrafenib	72	10000	1046360	4389347	509314
A388	dabrafenib	72	1	1449840	1436744	462710
A388	dabrafenib	72	3.16	1462520	1436744	462710
A388	dabrafenib	72	10	1381574	1436744	462710
A388	dabrafenib	72	31.62	1341127	1436744	462710
A388	dabrafenib	72	100	1397633	1436744	462710
A388	dabrafenib	72	316.23	1269467	1436744	462710
A388	dabrafenib	72	1000	1493020	1436744	462710
A388	dabrafenib	72	3162.28	1301320	1436744	462710
A388	dabrafenib	72	10000	1433707	1436744	462710
A-427	dabrafenib	72	1	2036914	2155940	332137
A-427	dabrafenib	72	3.16	2010247	2155940	332137
A-427	dabrafenib	72	10	1994694	2155940	332137
A-427	dabrafenib	72	31.62	2286340	2155940	332137
A-427	dabrafenib	72	100	2102567	2155940	332137
A-427	dabrafenib	72	316.23	2449007	2155940	332137
A-427	dabrafenib	72	1000	2193560	2155940	332137
A-427	dabrafenib	72	3162.28	1170320	2155940	332137
A-427	dabrafenib	72	10000	1053927	2155940	332137
A-498	dabrafenib	72	1	1308574	1332007	631144
A-498	dabrafenib	72	3.16	1708640	1332007	631144
A-498	dabrafenib	72	10	1511920	1332007	631144
A-498	dabrafenib	72	31.62	1651627	1332007	631144
A-498	dabrafenib	72	100	1953840	1332007	631144
A-498	dabrafenib	72	316.23	1387874	1332007	631144
A-498	dabrafenib	72	1000	1057107	1332007	631144
A-498	dabrafenib	72	3162.28	624687	1332007	631144
A-498	dabrafenib	72	10000	758947	1332007	631144
A-549	dabrafenib	72	1	4904627	4761553	825623
A-549	dabrafenib	72	3.16	4773587	4761553	825623
A-549	dabrafenib	72	10	4624827	4761553	825623
A-549	dabrafenib	72	31.62	4766320	4761553	825623
A-549	dabrafenib	72	100	4831594	4761553	825623
A-549	dabrafenib	72	316.23	4899887	4761553	825623
A-549	dabrafenib	72	1000	4909987	4761553	825623
A-549	dabrafenib	72	3162.28	3389494	4761553	825623
A-549	dabrafenib	72	10000	2899354	4761553	825623
A-704	dabrafenib	72	1	4643480	4767387	2356770
A-704	dabrafenib	72	3.16	4644794	4767387	2356770
A-704	dabrafenib	72	10	4671140	4767387	2356770
A-704	dabrafenib	72	31.62	4661394	4767387	2356770
A-704	dabrafenib	72	100	4589493	4767387	2356770
A-704	dabrafenib	72	316.23	4370293	4767387	2356770
A-704	dabrafenib	72	1000	3524160	4767387	2356770
A-704	dabrafenib	72	3162.28	2691493	4767387	2356770
A-704	dabrafenib	72	10000	2816493	4767387	2356770
ACHN	dabrafenib	72	1	5675400	5968820	989563
ACHN	dabrafenib	72	3.16	6105260	5968820	989563
ACHN	dabrafenib	72	10	6010140	5968820	989563
ACHN	dabrafenib	72	31.62	5984774	5968820	989563
ACHN	dabrafenib	72	100	5677174	5968820	989563
ACHN	dabrafenib	72	316.23	4892520	5968820	989563
ACHN	dabrafenib	72	1000	2600634	5968820	989563
ACHN	dabrafenib	72	3162.28	1274047	5968820	989563
[truncated: 6,319 more rows]

## Sheet: TableS3d_cell_panel_LD50data
Uitdehaag et al. (2018) Supplementary Table S3d. Cell panel proliferation data evaluated as LD50s. Data in nM, except for Herceptin which is in ng/ml. For details see www.ntrc.nl. LD50 is defined as the concentration at which the remaining cell number is half of the original number seeded in the assay.
*Compound has been approved prior to the current study, but was profiled as a reference.
	Abemaciclib	Acalabrutinib	Alectinib	Brigatinib	Ceritinib	Cobimetinib	Copanlisib	Ibrutinib	Idelalisib	Lenvatinib	Midostaurin	Neratinib	Nintedanib	Osimertinib	Palbociclib	Ribociclib	Tivozanib	Afatinib*	Crizotinib*	Erlotinib*	Gefitinib*	Herceptin*	Lapatinib*	Trametinib*
5637	10306.7	>31600	>10000	1824.1	6389.33	8694.63	>10000	>31600	>31600	>31600	5523.53	2884.99	6964.07	4612.91	>10000	>31600	>31600	3317.91	4156.42	>31600	17440	>10000	19772.3	>28165
769-P	13369.4	>31600	>10000	>10000	4914.09	>10000	>10000	>31600	>31600	>31600	1258.48	7220.62	6322.29	11893.8	>3160	>31600	>31600	15038	6322.61	>31600	19030	>10000	20479	>28165
786-O	6768.82	>31600	>10000	>10000	5443.52	>10000	>10000	>31600	>31600	>31600	8097.46	4854.18	8511.51	9729.21	>10000	>31600	>31600	12133.3	10434.6	>31600	30127.7	>10000	>31600	>28165
A-172	7917.17	>31600	>10000	2453.67	5362.81	7200	>10000	>31600	>31600	>31600	1907.63	5940.1	5534.18	7693.66	6135.05	21463.6	>31600	5822.64	7133.46	>31600	18352.8	>10000	19798.1	>28165
A-204	2374.48	>31600	>10000	8966.02	5091.16	8690	>10000	>31600	>31600	8067.01	6554.09	9621.21	3000	3428.04	>10000	>31600	>10000	6052.62	6957.02	>31600	23623.7	>10000	30253.5	>28165
A375	6920	>31600	>10000	>10000	9716.36	>10000	8176.22	>31600	>31600	>31600	>31600	6259.39	7131.47	5153.83	>3160	>31600	>31600	8466.76	5864.87	>31600	24549.7	>10000	>31600	>316
A388	5760	>31600	>10000	4427.64	5954.67	>10000	540.11	>31600	>31600	>31600	>31600	>3160	5012.84	4707.66	6998.42	>31600	>31600	>1000	7488.83	>31600	13410	>10000	22023.7	>28165
A-427	5190	>31600	>10000	2567.19	22190.8	>10000	>10000	22876.4	>31600	>31600	1068.71	9659.18	5480	12179.8	>10000	>31600	>31600	7995.12	5703.77	>31600	23334	>10000	20418.8	>316
A-498	7520.76	>31600	>10000	4486.67	6361.65	>10000	>10000	>31600	>31600	>31600	3150.05	6810.26	22416.4	16202.9	30286.1	>31600	>31600	4284.21	8882.25	>31600	24065.1	>10000	24500.8	>28165
A-549	6390	>31600	>10000	5358.14	11911.4	>10000	>10000	>31600	>31600	>31600	>31600	>10000	24461.6	>31600	>31600	>31600	>31600	20897.5	6952.81	>31600	>31600	>10000	>31600	>28165
A-704	2895.13	>31600	>10000	7218.48	9601.58	>10000	>10000	>31600	>31600	>31600	3469.05	3712.21	7613.15	5179.23	14666.8	>31600	>31600	8611.09	6597.02	>31600	18010.6	>10000	>31600	>28165
ACHN	4590	>31600	>10000	4530.08	8607.36	>10000	>10000	>31600	>31600	>31600	>31600	>3160	11489.1	15000	>10000	>31600	>31600	>1000	9847.91	>31600	29960	>10000	>31600	>316
AN3 CA	5969.4	>31600	>10000	>10000	6132.62	>10000	349.094	>31600	>31600	>31600	>31600	4239.21	6420	6598.96	16966.4	>31600	>31600	7966.67	10364.3	>31600	25208.7	>10000	18438	>316
AsPC-1	10414.2	>31600	>10000	8058.47	5342.07	>10000	>10000	>31600	>31600	>31600	>31600	>10000	8520.39	11960.2	19159.2	>31600	>31600	17192.8	8813.61	>31600	>31600	>10000	30423.1	>316
AU-565	5210	6342.8	>10000	>10000	5227.54	>10000	203.145	141.069	>31600	>31600	21055.5	76.2915	6719.92	417.942	12499.2	>31600	>31600	123.237	9552.22	31558.7	4517.86	>10000	965.809	>28165
BL-70	>3160	>10000	>10000	>10000	5118.19	>10000	2289.14	>10000	>31600	>31600	3160	2615.74	5716.74	>31600	>10000	>31600	>31600		3883.93
BT-20	16946.3	>31600	>10000	>10000	7785.1	>10000	291.156	>31600	>31600	>31600	2869.15	9373.28	30824.6	20045.6	19346.3	>31600	>31600	6190.8	17226.2	>31600	>31600	>10000	>31600	>28165
BT474	16563.4	>10000	>10000	>10000	4216.62	>10000	260.605	>10000	>31600	>31600	>31600	1000	5339.06	>3160	>10000	>31600	>31600		8522.82
BT-549	8147.06	>31600	>10000	6779.75	7090.64	>10000	>10000	>31600	>31600	>31600	5773.49	8736.48	9583.02	8707.33	28748.6	>31600	>31600	12011.1	5299.81	>31600	>31600	>10000	>31600	>28165
BxPC-3	8296.05	>31600	>10000	2573.43	5620.57	1080	2105.36	>31600	>31600	>31600	8212.13	316	4448.31	5360	8051.72	>31600	>31600	5867.16	4854.86	>31600	>10000	>10000	19582.1	>316
C-33 A	6250	>31600	>10000	>10000	7021.27	>10000	>10000	>3160	>31600	>31600	>31600	>3160	16903.3	5910	17098.9	>31600	>31600	5739.66	22756.9	>31600	>31600	>10000	>31600	>316
CAL 27	19318.4	>31600	>10000	1906.65	6191.95	7680	1627.01	>31600	>31600	>31600	>31600	>3160	7092.53	7288.99	8234.01	>10000	>31600	>1000	6926.17	>31600	17110	>10000	22032.2	>316
CCF-STTG1	6587.25	>31600	>10000	6310.28	5949.01	>10000	>10000	>31600	>31600	>31600	>3160	5681.84	8188.2	9189.99	15455.2	>31600	>31600	8830.23	8413.88	>31600	26833.3	>10000	29659.7	>28165
CCRF-CEM	8733.51	>31600	>10000	6818.79	6054.33	>10000	1615.07	>31600	>31600	>31600	>31600	5108.97	5853.97	7248.09	>3160	>10000	>31600	3471.81	5208.18	>31600	18517.8	>10000	26586.6	>28165
COLO 205	5040	>31600	>10000	3789.31	5477.84	444.399	4029.03	>31600	>31600	>31600	2777.95	9829.12	7760.66	6839.04	>3160	>31600	>31600	>31600	5788.15	>31600	27182.4	>10000	>31600	>316
COLO 829	6382.34	>31600	>10000	>10000	6162.93	3700	>10000	>31600	>31600	>31600	>31600	7978.91	9119.37	5787.21	20158.5	>31600	>31600	11304.5	7164.14	>31600	27471.6	>10000	19083.3	>28165
Daoy	8786.62	>31600	>10000	9418.09	7398.02	>10000	>10000	>31600	>31600	>31600	>31600	>3160	8665.26	11764.7	14166.8	>31600	>31600	6370.89	9736.39	>31600	>31600	>10000	>31600	>28165
DB	7761.12	>31600	>10000	>10000	6358.66	>10000	>10000	>31600	>31600	>31600	>31600	4894.62	8787.26	8588.05	14783.1	>31600	>31600	5780.17	4159.73	>31600	23995.2	>10000	21941.9	>28165
DLD-1	>31600	>31600	>10000	>10000	7269.68	>10000	>10000	>31600	>31600	>31600	>31600	>10000	10338.5	15251.1	>10000	>31600	>31600	15211.6	13296.8	>31600	>31600	>10000	>31600	>28165
DOHH-2	6976.65	>10000	>10000	1737.05	7393.35	>10000	321.773	4435.38	30193.1	28259.5	1051.73	2431.07	2683.1	3230.59	>10000	>10000	15206.1		2180.5
DoTc2 4510	2142.03	>31600	>10000	892.59	2483.13	1000	512.112	>3160	>31600	>31600	4636.49	1000	6113.16	1460	8949.35	>31600	>31600	>1000	5790.13	>31600	13010	>10000	11483.7	>316
DU 145	11475.9	>31600	>10000	3666.58	10289.1	>10000	>10000	>31600	>31600	>31600	>31600	>3160	23055.1	13800	24168.5	>31600	>31600	10101.5	13213.1	>31600	>31600	>10000	>31600	>28165
DU4475	6397.06	>31600	>10000	3670.98	7355.97	38.6278	3575.5	>31600	>31600	>31600	882.728	5852.81	5628.54	6141	19023.7	21180.6	>31600	5669.75	3239.07	>31600	22185.3	>10000	9326.28	19.7062
ES-2	9213.73	>31600	>10000	>10000	8119.41	9320	>10000	>31600	>31600	>31600	>31600	3953.67	13829.1	3518.68	>10000	>31600	>31600	>31600	5446.62	>31600	>31600	>10000	>31600	>316
FaDu	5180	>31600	>10000	7253.54	13066.6	>10000	>10000	>31600	>31600	>31600	>31600	>3160	15203.7	9060	>10000	>31600	>31600	>1000	13227	>31600	>31600	>10000	28834.4	>316
G-361	2150	>31600	>10000	>10000	2668.8	3240	>10000	>31600	>31600	>31600	>31600	2252.79	3418.32	1904.72	10735.6	>31600	>31600	5030.36	4489.58	>31600	9051.78	>10000	18955.4	>316
HCT 116	2160	>31600	>10000	>10000	15301.1	3035.77	>10000	>31600	>31600	>31600	>31600	7866.63	4456.79	3747.71	25305.2	>31600	>31600	23821.5	11055.4	>31600	23407.1	>10000	28539.9	5481.72
HCT-15	17996.3	>31600	>10000	>10000	8120.96	>10000	>10000	>31600	>31600	>31600	>31600	>10000	13791.7	13039.9	28285.3	>31600	>31600	14265.2	11339.7	>31600	30863.8	>10000	29086.9	>28165
HL-60	2440	>31600	>10000	>10000	2222.44	1000	>10000	>31600	>31600	>31600	>31600	5781.9	6054.37	2761.37	>10000	>31600	>31600	4660.3	3410.61	>31600	30616.5	>10000	16546.7	>316
Hs 578T	5655.82	>31600	8522.32	2660.36	5481.08	9671.07	>10000	>31600	>31600	>31600	2352.63	>3160	5639.39	4788.16	8607.67	>31600	>31600	5364.27	5876.33	>31600	20156.6	>10000	26312.1	>28165
Hs 746T	8935.26	>31600	>10000	>10000	4554.97	>10000	9970.03	>31600	>31600	>31600	>31600	>3160	7064.17	4296.54	>3160	>10000	>31600	6244.14	2640.95	>31600	16647.1	>10000	20650.8	>28165
Hs 766T	3620	>31600	>10000	>10000	7323.39	>10000	>10000	>31600	>31600	>31600	>31600	6990.69	5483.23	7516.59	7415.34	31160.9	>31600	8026.92	5156.69	>31600	29117.2	>10000	27575.8	>316
HT	7886.13	>31600	>10000	>10000	6868.36	>10000	4135.39	>31600	>31600	>31600	>31600	6569.71	8389.81	5716.94	16110.8	>31600	>31600	4904.99	8926.7	>31600	26487.5	>10000	19680.2	>28165
HT-1080	4980	>31600	>10000	>10000	12782.4	>10000	>10000	>31600	>31600	>10000	>31600	5157.76	>31600	22057.2	>3160	>31600	>31600	20440.1	9866.87	>31600	>31600	>10000	>31600	>316
HuTu 80	6520	>31600	>10000	1722.81	14626.1	>10000	2823.55	>31600	>31600	>31600	790.004	9206.23	10745.6	30052.6	>10000	>31600	>31600	13534.2	5298.68	>31600	25020	>10000	27138	>28165
J82	6333.72	>31600	>10000	7598.82	6299.69	>10000	>10000	>31600	>31600	>31600	>31600	9756.29	14652.6	9954.52	22106.4	>31600	>31600	11449	17641.1	>31600	>31600	>10000	>31600	>28165
JAR	3148.01	>31600	>10000	9973.81	10399.7	>10000	>10000	>31600	>31600	>31600	>31600	6780.8	9684.26	7298.26	6282.89	29070.8	>31600	6801.99	5429.17	>31600	18774.2	>10000	>31600	>28165
JM-1	>3160	>10000	>10000	3132.61	4965.02	>10000	>3160	>10000	>31600	>31600	1442.79	8849.74	7660.61	11051.4	>10000	>31600	>31600		4836.37
Jurkat E6.1	2892.57	>31600	>10000	>10000	5763.42	>10000	2225.44	>31600	>31600	>31600	>31600	3464.11	7895.03	6901.43	>3160	19373.1	>31600	4471.95	7196.51	>31600	19004.7	>10000	26446.9	>28165
K-562	5930	>31600	>10000	>10000	8610.05	7020	>10000	>31600	>31600	>31600	>31600	>10000	2457.44	3201.75	>31600	>31600	13313.7	11049	1503.75	>31600	>31600	>10000	20901.3	>316
KATO III	3290	>31600	>10000	1474.25	6761.68	1246.95	>10000	>31600	>31600	>31600	>31600	>3160	3130	3424.73	>10000	>31600	>31600	10103.9	8641.25	>31600	13385	>10000	23098.5	>28165
KG-1	4050	>31600	>10000	3160	5178.9	6390	>10000	>31600	>31600	>31600	1163.16	>3160	1698.72	4520	>10000	>31600	13429.9	6112.75	7743.77	>31600	>31600	>10000	28510.1	>316
KLE	6750	>31600	>10000	6573.57	6849.72	>10000	4865.2	>31600	>31600	>31600	>31600	>3160	5087.74	5050	18067.4	>31600	>31600	>1000	12272.5	>31600	>31600	>10000	31337.3	>28165
KU812	5180	>31600	>10000	2778.79	4244.18	145.507	>10000	4878.8	>31600	8779.73	>31600	3840.19	754.356	5232.96	>3160	>31600	1061.17	2663.56	625.66	>31600	19367.1	>10000	16735	66.1881
LNCaP FGC	1450	>31600	>10000	>10000	5037.73	>10000	9013.29	>31600	>31600	>31600	>31600	>3160	16800	8647.89	15865.9	>31600	>31600	12490.3	14701.9	>31600	>31600	>10000	>31600	>28165
LoVo	14429.1	>31600	>10000	>10000	11015.2	1013.63	>10000	>31600	>31600	>31600	>31600	>3160	11349.8	15125.1	26418.6	>31600	>31600	>31600	7065.41	>31600	>31600	>10000	>31600	>316
LS 174T	4533.88	>31600	>10000	>10000	6719.69	>10000	4097.57	>31600	>31600	>31600	>31600	>10000	9016.45	16869.8	>10000	>1000	>31600	7431.29	11544.3	>31600	>31600	>10000	22290.7	>28165
LS411N	14611.7	>31600	>10000	9541.08	6944.54	>10000	4270.47	>31600	>31600	>31600	>31600	5639.22	6563.49	8817.63	>10000	>31600	>31600	6627.43	8567.17	>31600	>31600	>10000	29468.2	>316
MCF7	16988.3	>31600	>10000	>10000	4612.85	>10000	205.776	>31600	>31600	>31600	>31600	>10000	18190.3	14792.4	17609.4	>31600	>31600	16656.2	5378.22	>31600	>31600	>10000	28277.6	>28165
MDA-MB-231	>3160	>10000	>10000	>10000	18971.3	>10000	>3160	>10000	>31600	>31600	>31600	6623.56	11078.7	11388.5	>10000	>31600	>31600		18359.6
MeWo	11800	>31600	>10000	>10000	6471.27	7450	>10000	>31600	>31600	>31600	>31600	7399.17	6141.61	6569.72	>3160	>31600	>31600	7745.53	6336.9	>31600	19028.1	>10000	23132.2	>28165
MG-63	7140	>31600	>10000	7084.18	10072.8	>10000	>10000	>31600	>31600	>31600	4399.24	7613.65	8212.46	8381.26	>10000	>31600	>31600	8918.37	4445.11	>31600	27798.4	>10000	25746.5	>28165
MIA PaCa-2	6740	>31600	>10000	>10000	11502.4	>10000	>10000	>31600	>31600	>31600	>31600	7735.53	6616.4	8224.37	9685.24	>31600	>31600	6189.4	9905.95	>31600	25609.7	>10000	>31600	>28165
MOLT-4	9367.84	>31600	>10000	6904.78	9068.07	>10000	610.246	>10000	>31600	>31600	>31600	5235.15	12010.6	10934.5	>3160	22254.7	>31600	5987.12	1033.74	>31600	24294.5	>10000	29372.2	>28165
NCCIT	6958.1	>31600	>10000	8372.98	4966.82	>10000	1872.19	>31600	>31600	>31600	>31600	7743.93	5736.21	10269.5	17458.9	>31600	>31600	12416.6	5849.38	>31600	28657.5	>10000	28409.8	>28165
NCI-H460	6980	>31600	>10000	>10000	8064.55	>10000	>10000	>31600	>31600	>31600	>31600	>10000	10743.7	9916.1	>10000	>31600	>31600	>31600	11510.6	>31600	>31600	>10000	>31600	>28165
NCI-H661	>1000	>31600	>10000	6722.67	6634.08	>10000	>10000	>31600	>31600	>31600	>31600	5269	9945.92	11554.7	16048.7	>31600	>31600	>1000	7843.64	>31600	>31600	>10000	23874.7	>28165
NCI-H82	10373.6	>31600	>10000	>10000	18366.9	>10000	>10000	>31600	>31600	>31600	>31600	>10000	7795.57	8043.49	19733.7	>31600	>31600	9712.03	10730.2	>31600	28181.3	>10000	20712.3	>28165
OVCAR-3	15300	>31600	>10000	3251.37	8366.57	>10000	493.616	>31600	>31600	>31600	>31600	>10000	18236.7	7557.96	16576.9	>31600	>31600	3965.66	10177	>31600	22860	>10000	>31600	>28165
PA-1	3955.99	>31600	>10000	5343.25	5029.7	9460	2532.7	>31600	>31600	>31600	2127.93	>3160	7875.62	2723.06	9781.45	23330	>31600	3610.53	1971.04	>31600	11522.9	>10000	18052.2	>28165
PC-3	>31600	>31600	>10000	>10000	6634.22	>10000	>10000	>31600	>31600	>31600	>31600	>10000	>31600	20570.6	>10000	>31600	>31600	9140.05	>10000	>31600	>31600	>10000	>31600	>28165
PFSK-1	5716.36	>31600	>10000	>10000	7624.57	>10000	2415.79	>31600	>31600	>31600	>31600	9047.93	6935.38	6271.44	14828.8	>31600	>31600	12280.3	6754.8	>31600	22248.6	>10000	16315.1	>28165
RD	6060.8	>31600	>10000	7705.83	11181.6	7237.31	4184.86	>31600	>31600	>31600	>31600	4090.6	4602.05	3716.8	6437.23	>31600	>31600	3635.49	6782.01	>31600	16797.2	>10000	>31600	>316
RKO	6640	>31600	>10000	>10000	6802.89	9855	>10000	>31600	>31600	>31600	>31600	>10000	17180.5	9187.58	27775	>31600	>31600	14942.9	4214.77	>31600	29624.7	>10000	>31600	>316
RL	29759.4	>31600	>10000	>10000	6892.88	>10000	>10000	>31600	>31600	>31600	7985.16	7076.4	6380.05	10986.1	>10000	>31600	>31600	20990.9	15334.5	>31600	21192.2	>10000	19213.2	>28165
RL95-2	1744.2	>31600	>10000	6230.14	6110.05	1000	988.748	>31600	>31600	>31600	>31600	2322.5	5761.74	2000	20423.8	>31600	>31600	>1000	4783.62	>31600	12810	>10000	13217.8	>316
RPMI-7951	5190	>31600	>10000	5676.17	6293.27	>10000	>10000	>31600	>31600	>31600	2866.53	>10000	7180.66	6301.54	30913.6	>31600	>31600	7720.34	5365.49	>31600	27104.7	>10000	23218.2	>28165
RS4-11	4452.47	>31600	>10000	>10000	4097.77	>10000	>10000	>31600	>31600	>31600	930.325	4272.26	7713.69	6402.89	>10000	22499.9	>31600	5661.97	1720.8	>31600	>31600	>10000	19485.4	>28165
RT4	5960	>31600	>10000	3160	5345.52	>10000	>10000	>31600	>31600	>31600	>31600	>10000	6399.27	4930	>10000	>31600	>31600	4631.93	8653.34	>31600	16720	>10000	>31600	>28165
SHP-77	5094.3	>31600	>10000	>10000	4816.3	>10000	>10000	>31600	>31600	>31600	10979.8	6674.17	11842.4	9752.38	19234.2	>31600	>31600	5382.45	4997.12	>31600	>31600	>10000	31531.8	>28165
SJCRH30	6181.17	>31600	>10000	1783.68	2365.7	>10000	447.962	>31600	>31600	>31600	>31600	6218.88	7680.56	7124.02	10203.3	>31600	>31600	7383.99	3738.08	>31600	20381.3	>10000	17968.8	>28165
SK-N-AS	5270	>31600	>10000	>10000	6227.75	>10000	>10000	>31600	>31600	>31600	>31600	>3160	5411.51	7391.53	>10000	>31600	>31600	4531.9	5663.83	>31600	23667.6	>10000	31490.4	>316
SK-N-FI	5100	>31600	>10000	2950.2	1177.04	>10000	554.694	>31600	>31600	>31600	>31600	2585.21	7792.4	5797.99	>3160	>31600	>31600	2976.95	4207.07	>31600	20540.1	>10000	27676.7	>28165
SNU-5	5803.46	>31600	>10000	>10000	5662.66	7420	7278.1	>31600	>31600	>31600	>31600	>3160	6291.78	5968.6	>10000	>31600	>31600	6095.96	2339.81	>31600	19939.8	>10000	28998.3	>316
SNU-C2B	4620	>31600	>10000	>10000	7458.05	>10000	>10000	>31600	>31600	>31600	>31600	6354.03	7762.8	9202.16	21879.6	>31600	>31600	10683	11151.9	>31600	>31600	>10000	>31600	>28165
SR	1630.73	>31600	677.751	45.3659	287.358	7420	4164.78	>31600	>31600	>31600	832.21	4065.98	3804.14	3586.5	>3160	7878.16	26675.2	3717.71	321.53	>31600	16734.1	>10000	23227.6	>28165
SU-DHL-1	24869.9	>31600	766.083	61.3162	329.121	1379.12	>10000	>31600	>31600	>31600	>31600	6212.83	5154.56	4400.01	16249.3	>31600	30631.9	13555.5	405.252	>31600	23221.1	>10000	13124.3	1572.98
SU-DHL-5	11569.9	>10000	>10000	5724.63	3865.85	>10000	513.175	>10000	>31600	>31600	1281.45	8108.31	9661.54	9378.46	>10000	26530.9	>31600		2378.98
SU-DHL-6	4140	>31600	>10000	3533.52	5695.01	>10000	20.5761	>3160	>1000	>31600	2408.1	4041.91	6247.26	6961.69	>3160	>10000	24245.3	2765.62	4680.03	>31600	17595.6	>10000	23005.3	>28165
SUP-T1	7370	>31600	>10000	>10000	12131.9	>10000	>10000	>31600	>31600	>31600	>31600	5259.02	8639.43	11310.9	>10000	>31600	>31600	7148.52	12503.9	>31600	20653.2	>10000	17300.9	>28165
SW48	7980	>31600	>10000	1974.92	4664.27	>10000	>10000	>31600	>31600	>31600	742.752	>3160	9334.14	6930	>10000	>10000	19709.4	>1000	1553.41	>31600	>31600	>10000	27573.3	>316
SW480	7572.23	>31600	>10000	8111.26	13243.4	>10000	>10000	>31600	>31600	>31600	>31600	7205.05	10999.3	7467.02	16816.3	>31600	>31600	14072.2	5798.62	>31600	27939.3	>10000	22597.2	>28165
SW620	7290	>31600	>10000	>10000	11702.6	>10000	>10000	>31600	>31600	>31600	>31600	>10000	9453.81	10575.4	>10000	>31600	>31600	7449.22	4581.94	>31600	>31600	>10000	>31600	>316
SW626	6182.45	>31600	>10000	7723.46	6391.28	>10000	7554.98	>31600	>31600	>31600	>31600	6307.72	9741.91	6118.49	13634.5	>31600	>31600	10483.4	5811.1	>31600	26509.8	>10000	18804.8	>316
SW837	19035.7	>31600	>10000	>10000	7638.05	>10000	>10000	>31600	>31600	>31600	>31600	9861.6	11485	13210.4	29606.2	>31600	>31600	19264.8	12189.7	>31600	>31600	>10000	>31600	>28165
SW872	7440	>31600	>10000	>10000	10332.1	>10000	>10000	>31600	>31600	>31600	>31600	8320.35	8076.18	8238.34	24984	>31600	>31600	16296.1	7377.09	>31600	25505	>10000	19892.7	>316
SW900	6570	>31600	>10000	>10000	12311.7	>10000	>10000	>31600	>31600	>31600	>31600	>10000	8561.46	18704.7	>10000	>31600	>31600	15182.2	10381.9	>31600	23237.6	>10000	>31600	>28165
SW948	5700	>31600	>10000	>10000	6270.6	>10000	873.953	>31600	>31600	>31600	>31600	6908.88	7092.95	8933.94	11837.9	>31600	>31600	19604.2	5545.32	>31600	>31600	>10000	23506.7	>316
SW982	6900	>31600	>10000	1439.51	8409.46	>10000	>10000	>31600	>31600	>31600	326.437	6380.87	9467.48	7759.3	>10000	>31600	>31600	13411.8	2899.17	>31600	29038	>10000	27527.6	>28165
T24	1930	>31600	>10000	>10000	6900.94	>10000	>10000	>31600	>31600	>31600	>31600	>3160	9051.47	10455.4	>10000	>31600	>31600	14733.3	11446.3	>31600	>31600	>10000	>31600	>316
T98G	5430	>31600	>10000	5239.98	7434.37	>10000	4793.55	>31600	>31600	>31600	1621.39	>10000	21286.6	25064.2	>10000	>31600	>31600	18003.1	13398.9	>31600	>31600	>10000	>31600	>28165
TCCSUP	6549.04	>31600	>10000	5892.29	5412.3	>10000	>10000	>31600	>31600	>31600	1801.09	>10000	6071.26	6106.09	14670.2	>31600	>31600	12716.7	6176.85	>31600	26837.7	>10000	22488.7	>28165
THP-1	17610.4	>31600	>10000	>10000	8765.81	>10000	>10000	>31600	>31600	>31600	>31600	>10000	22956.2	19338.9	>10000	>31600	>31600	8869.14	8101.37	>31600	>31600	>10000	23918	>316
TT	3540	>31600	>10000	>10000	4508.65	>10000	2974.57	>31600	>31600	>31600	>10000	4973.03	3420	4813.11	13047.2	>31600	>31600	5790.09	4458.38	>31600	15803.7	>10000	20060.1	>28165
U-118 MG	6991.83	>31600	>10000	5759.63	5556.59	9510	>10000	>31600	>31600	>31600	>31600	>3160	8975.32	5827.99	>3160	>31600	>31600	6393.74	7042.39	>31600	26376.6	>10000	>31600	>28165
U-2 OS	1794	>31600	>10000	4202.27	8101.14	2454.4	>10000	>31600	>31600	>31600	4833.22	>10000	5647.69	9563.64	30742.2	>31600	>31600	10251.8	13750.6	>31600	26456.1	>10000	24731.3	>316
U-87 MG	8170	>31600	>10000	>10000	6398.37	>10000	>10000	>31600	>31600	>31600	>31600	5982.56	9336.38	6573.6	>10000	>31600	>31600	7350.29	6966.75	>31600	24391.3	>10000	28557	>28165
VA-ES-BJ	5250	>31600	>10000	3004.28	6020.02	>10000	1443.45	>31600	>31600	>31600	1939.03	>3160	6585.03	7610.52	>3160	>10000	>31600	6233.35	4749.43	>31600	>31600	>10000	>31600	>28165
