# Supplementary material for: Combined Cellular and Biochemical Profiling to Identify Predictive Drug Response Biomarkers for Kinase Inhibitors Approved for Clinical Use between 2013 and 2017
Source: Oxford University Press journal article supplement (doi:10.1158/1535-7163.mct-18-0877), 2018-10-31
Supplement: 15357163mct180877-sup-206465_2_supp_5070873_pfzh5r.xlsx [file 15357163mct180877-sup-206465_2_supp_5070873_pfzh5r.xlsx]

## Sheet: Table_S6
Uitdehaag et al. (2018) Supplementary Table S6. Sensitivity and specificity of the identified genomic and gene expression drug response markers.
Legend
- For genomic markers: Marker positive cell lines are defined as having a mutation, copy number variation, or translocation in the presented gene.
- For gene expression markers: Marker positive cell lines are defined as having 1.96 standard deviations higher gene expression compared to the average of 1000 cell lines. The average and standard deviation are calculated based on the complete CCLE cell line set.
- (s) indicates that presence of the marker predicts drug sensitivity
- (r) indicates that presence of the marker predicts drug resistance
- Responsive cell lines are defined as having a 5-fold more potent IC50 (for sensitivity markers) or 5-fold less potent IC50 (for resistance markers) than the cell panel log-average IC50.
- True Positives are those cell lines that have the marker, and are responsive
- False Negatives are marker positive cell lines that are not responsive
- False Positives are marker negative cell lines that are responsive
- True Negatives are marker negative cell lines which are non-responsive
- Sensitivity is defined as (True Positives/(True Positives + False Negatives))*100.
- Specificity is defined as (True Negatives/(True Negatives + False Positives))*100.
- Numbers are presented as %-values.
	Abemaciclib genomic markers										Abemaciclib gene expression markers
	CDKN2A (s)	TP53 (r)	PTEN (r)	RB1 (r)	CDKN2A marker positive + TP53/PTEN/RB1 marker negative						HGF (s)	CDKN2A (r)	CDKN2B (r)
Sensitivity	28.9474	27.5	44.4444	100	45.8333					Sensitivity	66.6667	100	60
Specificity	90	79.4118	78.7879	79.0476	91.6667					Specificity	87.5	77.1739	77.5281
	Palbociclib genomic markers										Palbociclib gene expression markers
	CDKN2A (s)	CTNNB1 (s)	NRAS (s)	PTEN (r)	KRAS (r)						HGF (s)	RAD51D (s)	RB1 (s)	CDKN2A (r)	CDKN2B (r)
Sensitivity	44.7368	80	50	33.3333	43.4783					Sensitivity	50	66.6667	50	100	60
Specificity	77.1429	71.8447	71	68.6869	71.7647					Specificity	71.5909	71.4286	70.6522	70.6522	70.7865
	Ribociclib genomic markers										Ribociclib gene expression markers
	CDKN2A (s)	CTNNB1 (s)	EZH2 (s)	TP53 (r)	PIK3CA (r)						RAD51D (s)*	CDKN2A (r)
Sensitivity	34.2105	80	66.6667	45	57.1429					Sensitivity	33	50
Specificity	85.7143	81.5534	80	82.3529	76.5957					Specificity	64	73.913
											*based on two-fold drug response cut-off
	Alectinib genomic markers										Alectinib gene expression markers
	NPM-ALK (s)										ALK (s)	DICER1 (s)	IL10 (s)	JAK3 (s)
Sensitivity	100									Sensitivity	28.5714	66.6667	50	100
Specificity	96.2264									Specificity	96.5517	96.7033	96.6667	97.8022
	Brigatinib genomic markers										Brigatinib gene expression markers
	NPM-ALK (s)										ALK (s)	DICER1 (s)	IL10 (s)	JAK3 (s)
Sensitivity	100									Sensitivity	28.5714	66.6667	50	100
Specificity	97.1698									Specificity	96.5517	96.7033	96.6667	97.8022
	Ceritinib genomic markers										Ceritinib gene expression markers
	NPM-ALK (s)										ALK (s)	DICER1 (s)	IL10 (s)	JAK3 (s)
Sensitivity	100									Sensitivity	42.8571	66.6667	50	66.6667
Specificity	99.0566									Specificity	100	98.9011	98.8889	98.9011
	Ibrutinib genomic markers										Ibrutinib gene expression markers
	ERBB2 (s)	EGFR (s)	TP53 (s)	FBXW7 (s)	KRAS (r)	BRAF (r)					CDK12 (s)	ERBB2 (s)	ERBB4 (s)	NFKBIA (s)	REL (s)	TP63 (s)	DDR2 (r)*	ETV1 (r)	ETV5 (r)
Sensitivity	80	75	37.5	28.5714	65.2174	63.6364				Sensitivity	100	100	60	66.6667	20	100	100	53.3333	100
Specificity	82.3529	81.5534	89.5522	80	73.8095	68.75				Specificity	80.2198	80.2198	80.6818	80	78.4091	79.3478	42	66.6667	64.1304
																	*based on two-fold drug response cut-off
	Osimertinib genomic markers										Osimertinib gene expression markers
	SMAD4 (s)	ERBB2 (s)	EGFR (s)	FBXW7 (s)	KRAS (r)*						ERBB2 (s)	FGFR2 (s)	FGFR3 (s)	NFKBIA (s)	TP63 (s)
Sensitivity	42.8571	40	50	28.5714	43					Sensitivity	100	16.6667	100	100	100
Specificity	89.1089	88.3495	88.4615	88.1188	79					Specificity	89.1304	87.5	90.1099	90.1099	88.172
					*based on two-fold drug response cut-off
	Neratinib genomic markers										Neratinib gene expression markers
	SMAD4 (s)	ERBB2 (s)	FBXW7 (s)	KRAS (r)*							EGFR (s)	ERBB2 (s)	FOXA1 (s)
Sensitivity	42.8571	40	42.8571	61						Sensitivity	50	100	100
Specificity	88.1188	87.3786	88.1188	66						Specificity	88.0435	89.1304	88.172
				*based on two-fold drug response cut-off
	Cobimetinib genomic markers										Cobimetinib gene expression markers
	BRAF (s)	SMAD4 (s)	KRAS (s)								ETV4 (s)	ETV5 (s)	AKT2 (r)	BARD1 (r)	BCL6 (r)
Sensitivity	90.9091	42.8571	30.4348							Sensitivity	57.1429	100	100	66.6667	70
Specificity	75.2577	69.3069	68.2353							Specificity	71.2644	69.8925	72.4138	68.1319	71.4286
											Copanlisib gene expression markers
											CEBPA (s)	ERBB2 (s)*	FGFR2 (s)	ICOSLG (s)	KIT (s)
										Sensitivity	100	100	16.6667	25	60
										Specificity	92.3913	75	90.9091	91.8605	91.0112
												*based on two-fold drug response cut-off
											Midostaurin gene expression markers
											PDGFRB (s)*
										Sensitivity	25
										Specificity	81
											*based on two-fold drug response cut-off
											Lenvatinib gene expression markers
											PIM1 (s)
										Sensitivity	25
										Specificity	88.764
											Nintedanib gene expression markers
											PIM1 (s)
										Sensitivity	75
										Specificity	95.5556
											Tivozanib gene expression markers
											PIM1 (s)
										Sensitivity	75
										Specificity	94.4444
