# Supplementary material for: Combined Cellular and Biochemical Profiling to Identify Predictive Drug Response Biomarkers for Kinase Inhibitors Approved for Clinical Use between 2013 and 2017
Source: Oxford University Press journal article supplement (doi:10.1158/1535-7163.mct-18-0877), 2018-10-31

**Uitdehaag *et al*. (2018) Supplementary Figure S1**. Workflow for filtering cell line genomic data and subsequent identification of predictive drug response biomarkers. Mutation selection is based on Chang *et al.* Nat Biotechnol. 2016;34:155-163. Copy number variation gene selection is based on Vogelstein *et al.* Science 2013;339:1546-58 and Zack *et al.* Nat Genet. 2013;45:1134-40.


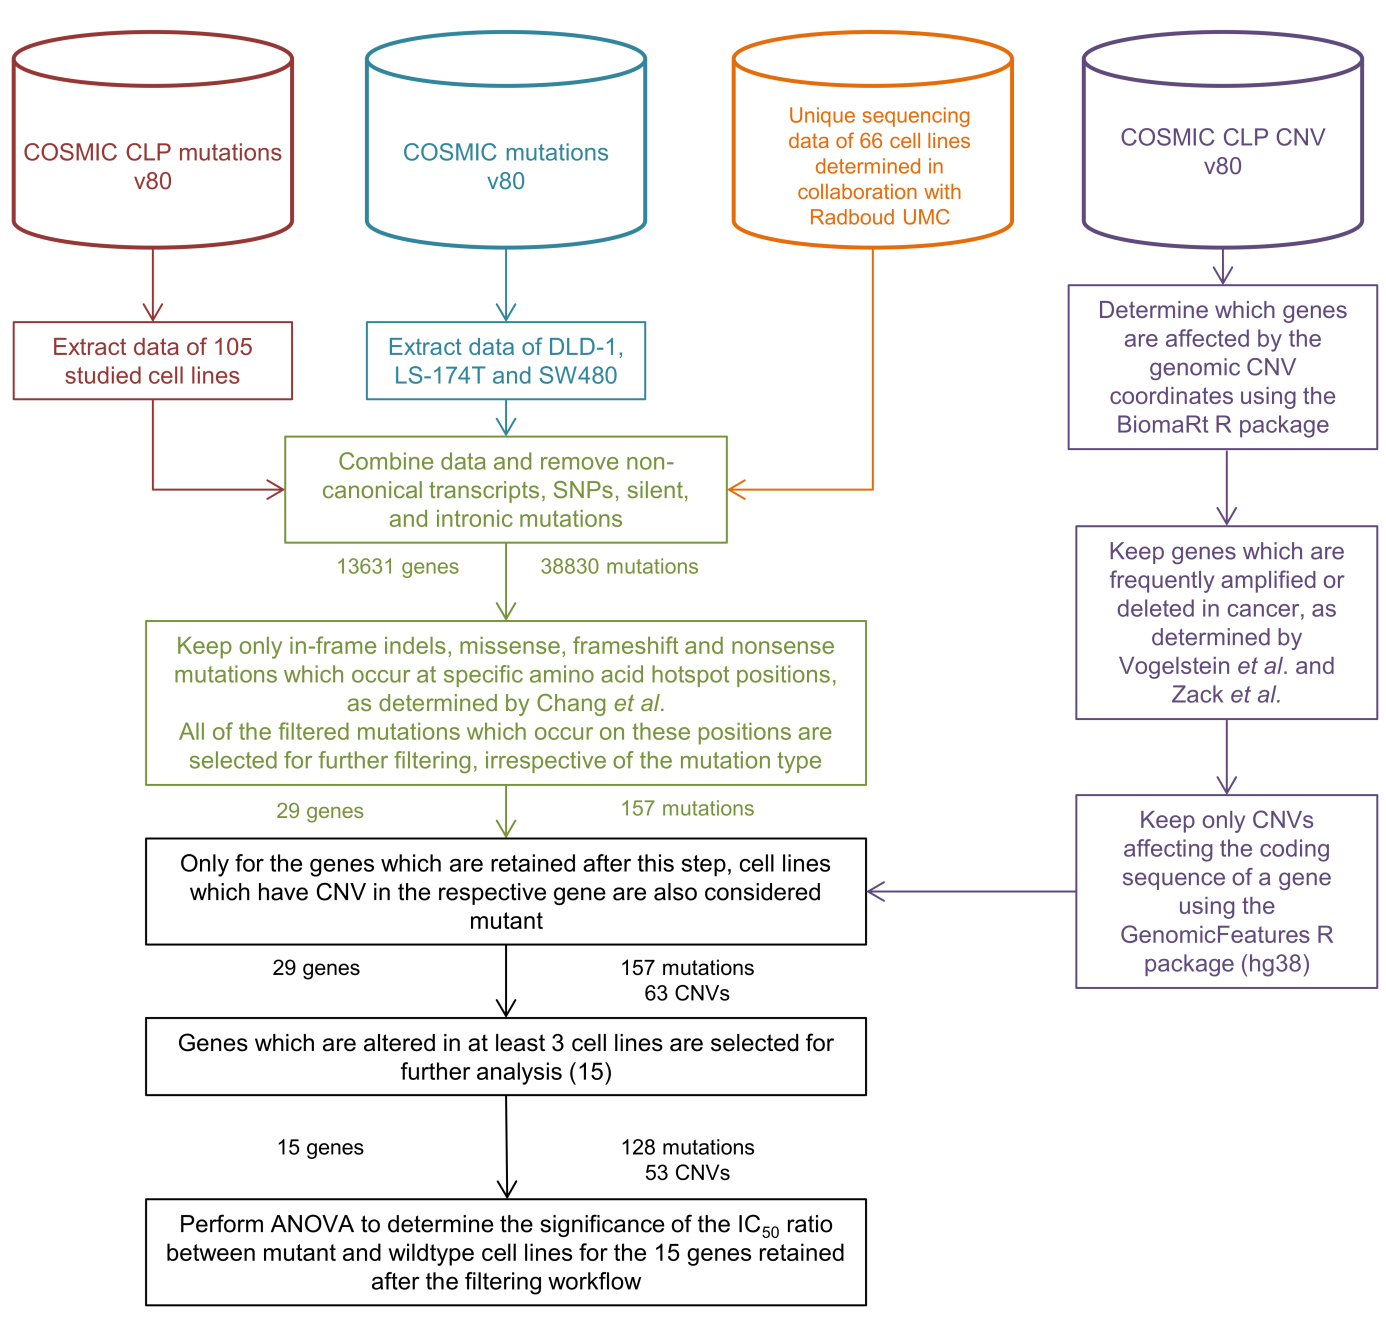

Supplement: 15357163mct180877-sup-206465_2_supp_5070884_pfzhy6.docx [file 15357163mct180877-sup-206465_2_supp_5070884_pfzhy6.docx]
