# Supplementary material for: Combined Cellular and Biochemical Profiling to Identify Predictive Drug Response Biomarkers for Kinase Inhibitors Approved for Clinical Use between 2013 and 2017
Source: Oxford University Press journal article supplement (doi:10.1158/1535-7163.mct-18-0877), 2018-10-31

**Uitdehaag *et al.* (2018) Supplementary Figure S2**. Workflow for identification and validation of predictive drug response biomarkers based on gene expression.


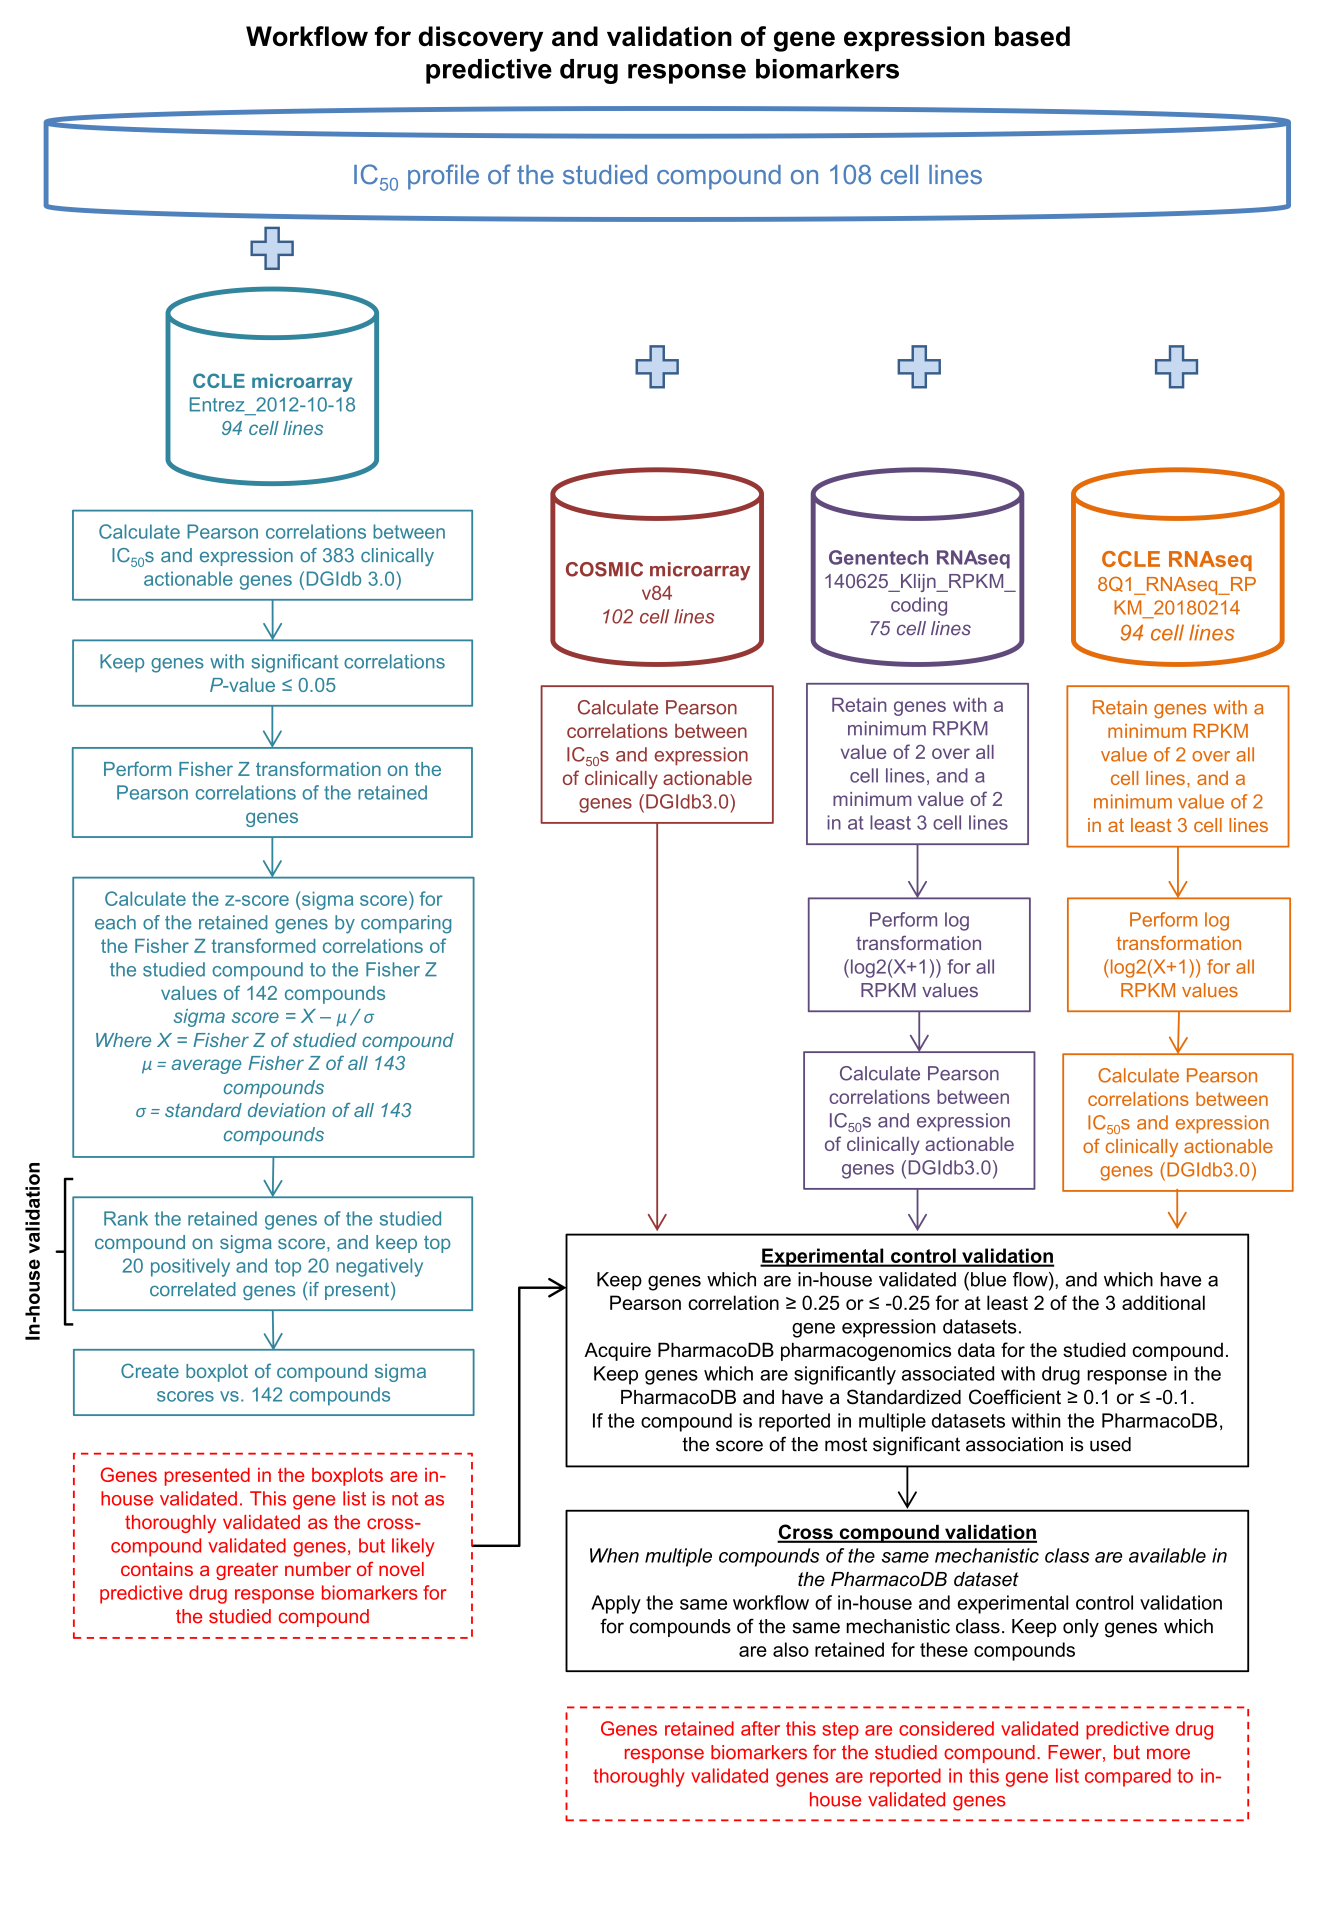

Supplement: 15357163mct180877-sup-206465_2_supp_5070885_pfzhy6.docx [file 15357163mct180877-sup-206465_2_supp_5070885_pfzhy6.docx]
