# Supplementary material for: Combined Cellular and Biochemical Profiling to Identify Predictive Drug Response Biomarkers for Kinase Inhibitors Approved for Clinical Use between 2013 and 2017
Source: Oxford University Press journal article supplement (doi:10.1158/1535-7163.mct-18-0877), 2018-10-31

**Uitdehaag *et al.* (2018) Supplementary Figure S5**. Analysis of MEK and BRAF inhibitors approved before Nov. 2013 in a 102 cell line profiling. **A,** Waterfall plots. **B**, Volcano plots. Colors are similar to Figure 5 in the main text. IC50,averages are 174 nM for trametinib, 3.4 µM for dabrafenib and 22.3 µM for vemurafenib.


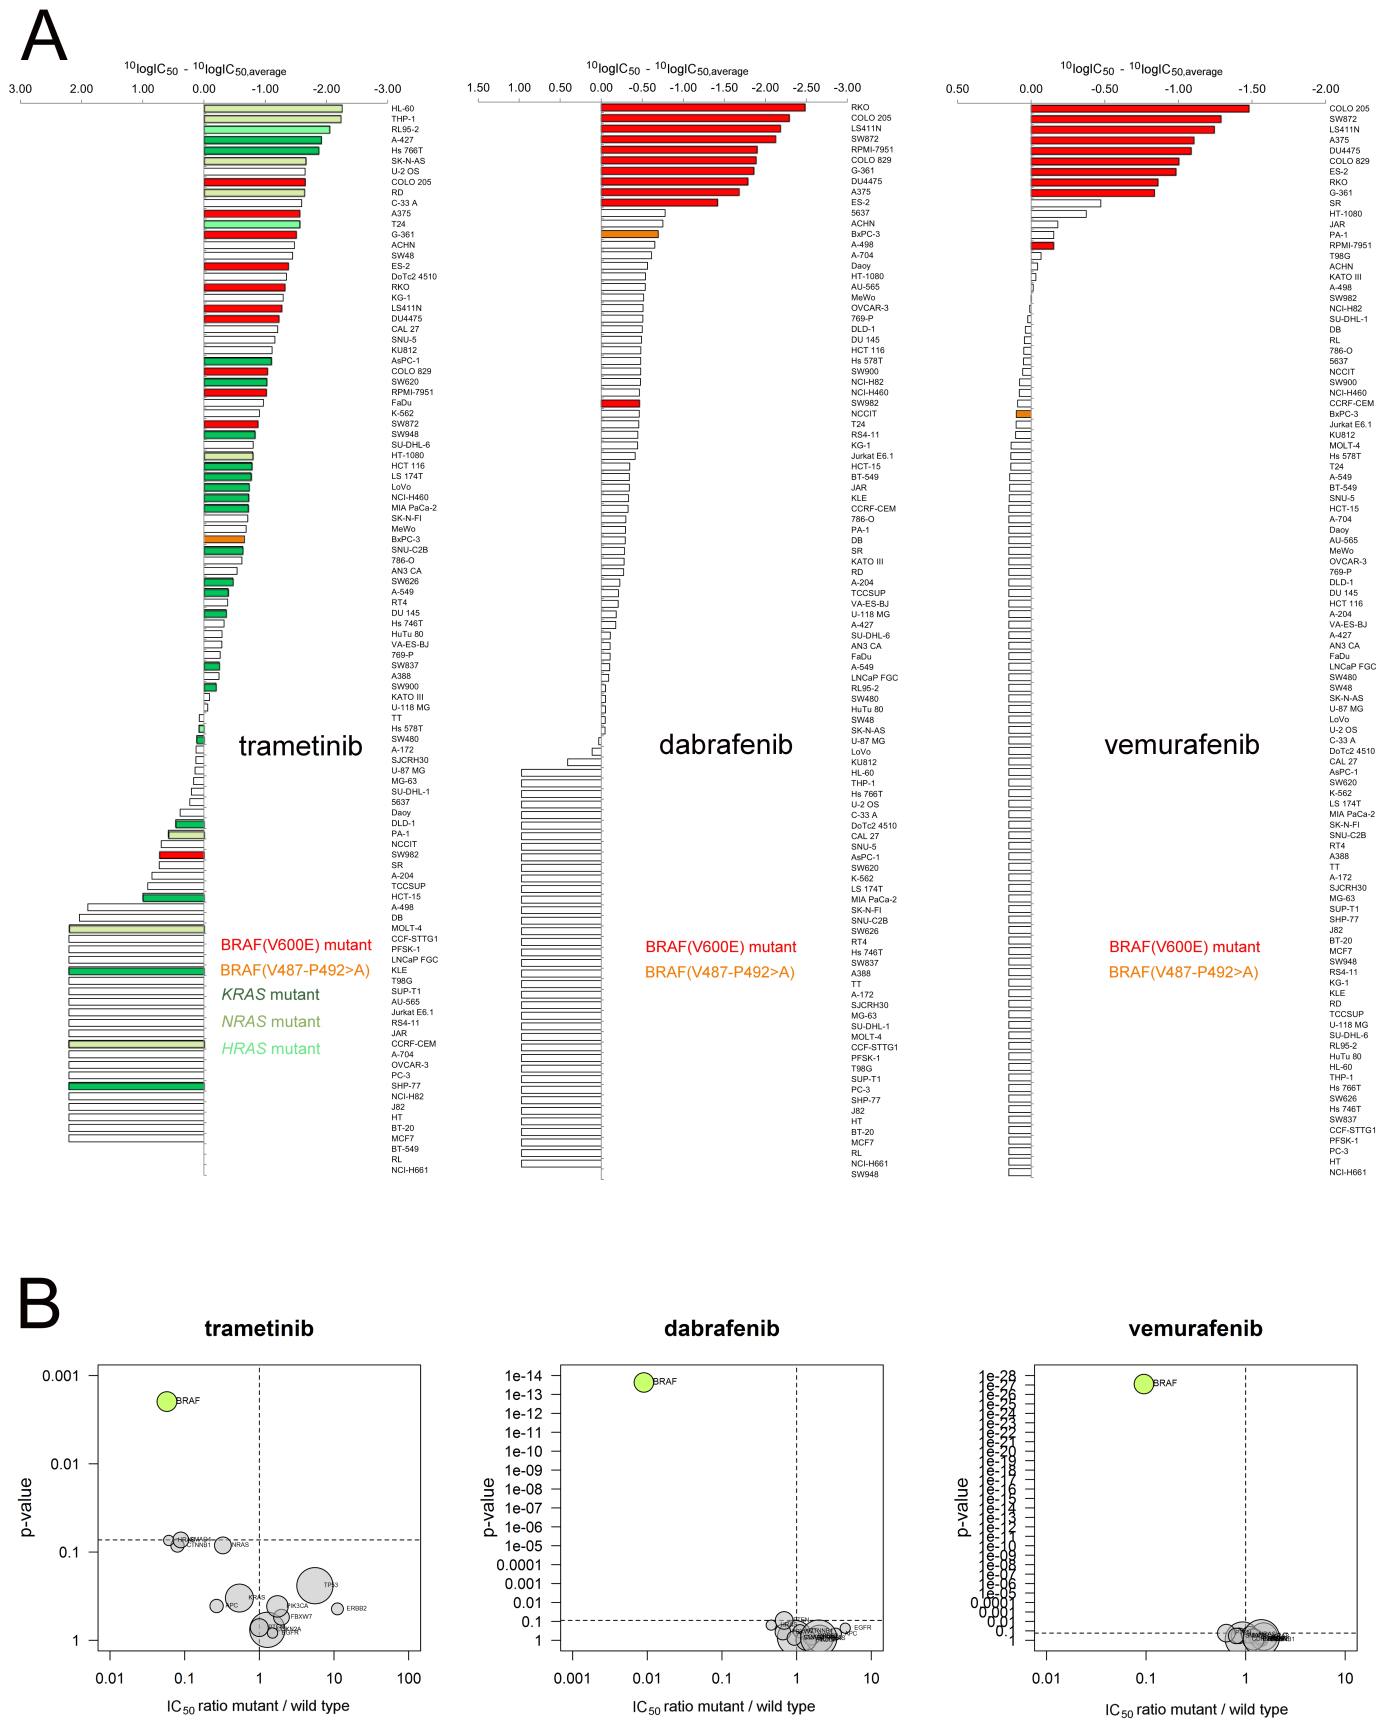

Supplement: 15357163mct180877-sup-206465_2_supp_5070888_pfzhy6.docx [file 15357163mct180877-sup-206465_2_supp_5070888_pfzhy6.docx]
