# Supplementary material for: Combined Cellular and Biochemical Profiling to Identify Predictive Drug Response Biomarkers for Kinase Inhibitors Approved for Clinical Use between 2013 and 2017
Source: Oxford University Press journal article supplement (doi:10.1158/1535-7163.mct-18-0877), 2018-10-31
Supplement: 15357163mct180877-sup-206465_2_supp_5070890_pfzhy7.docx [file 15357163mct180877-sup-206465_2_supp_5070890_pfzhy7.docx]

**Uitdehaag *et al.* (2018) Supplementary Figure S6**. **A**, Waterfall plots of the VEGFR inhibitors. Geometrically averaged panel IC50s are 12.6 µM for lenvatinib, 3.2 µM for nintedanib and 17.9 µM for tivozanib. **B**, Waterfall plot of midostaurin (IC50,average = 1.1 µM).

**A**


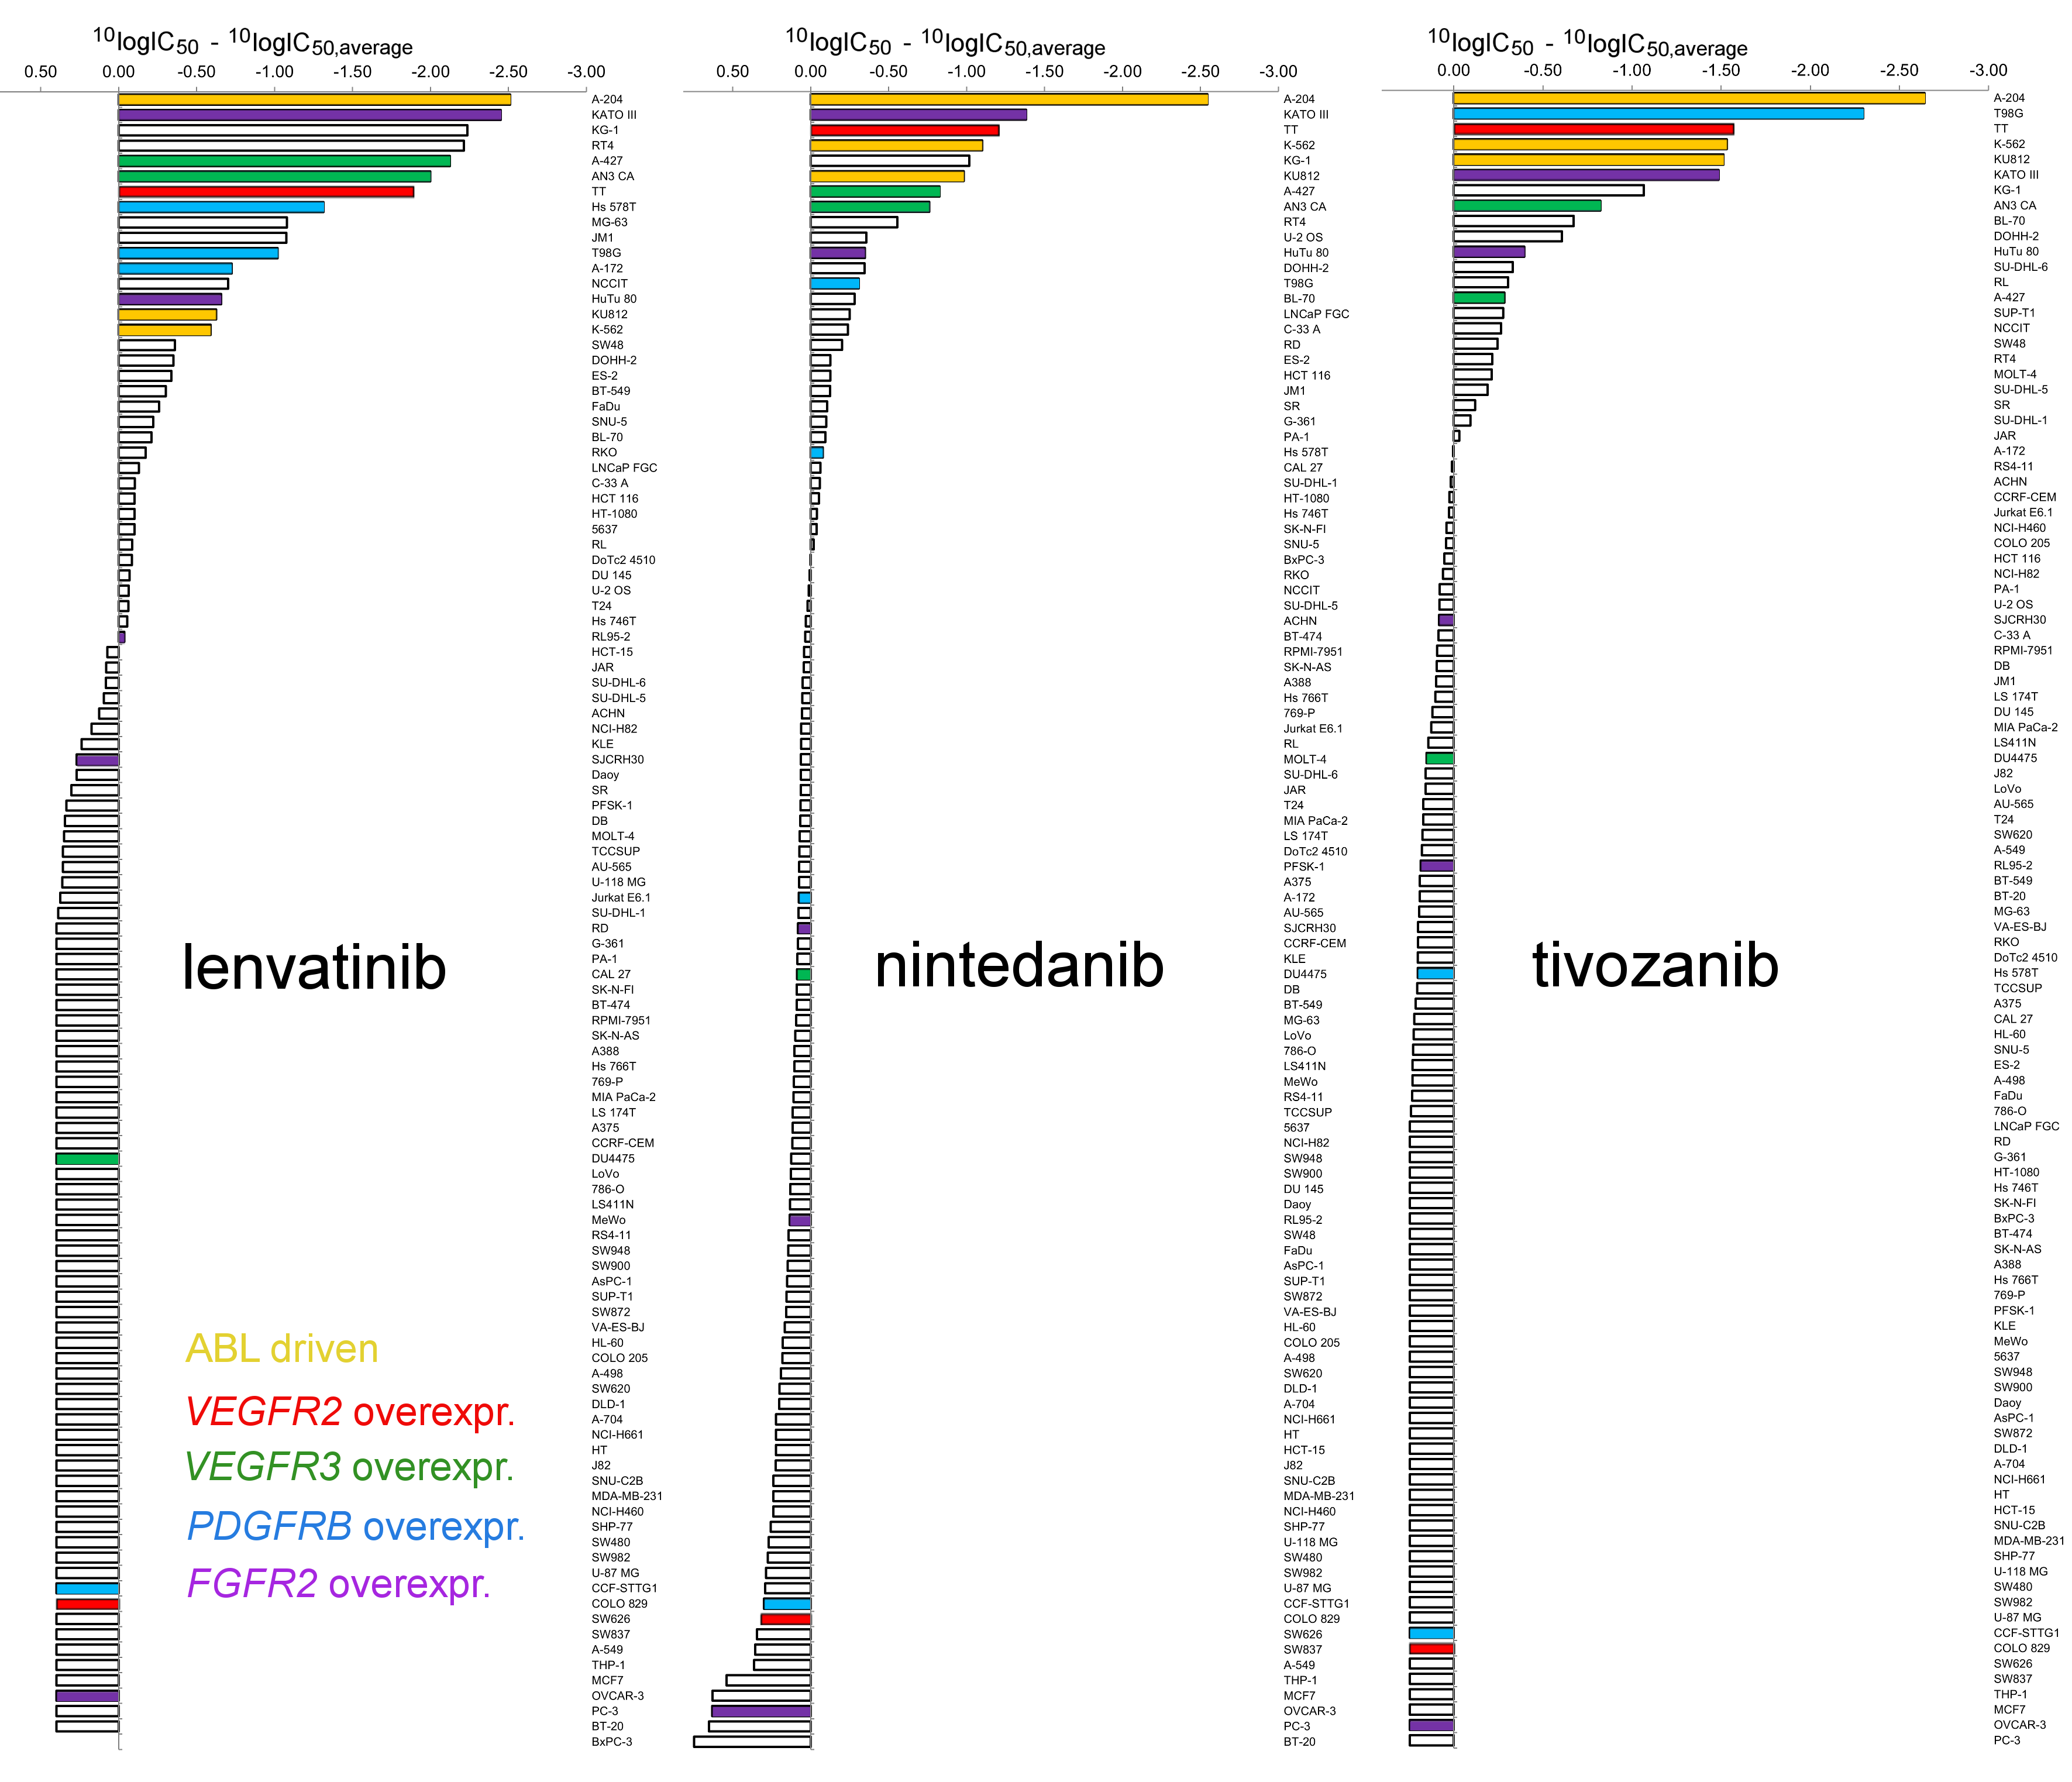


**B**

**
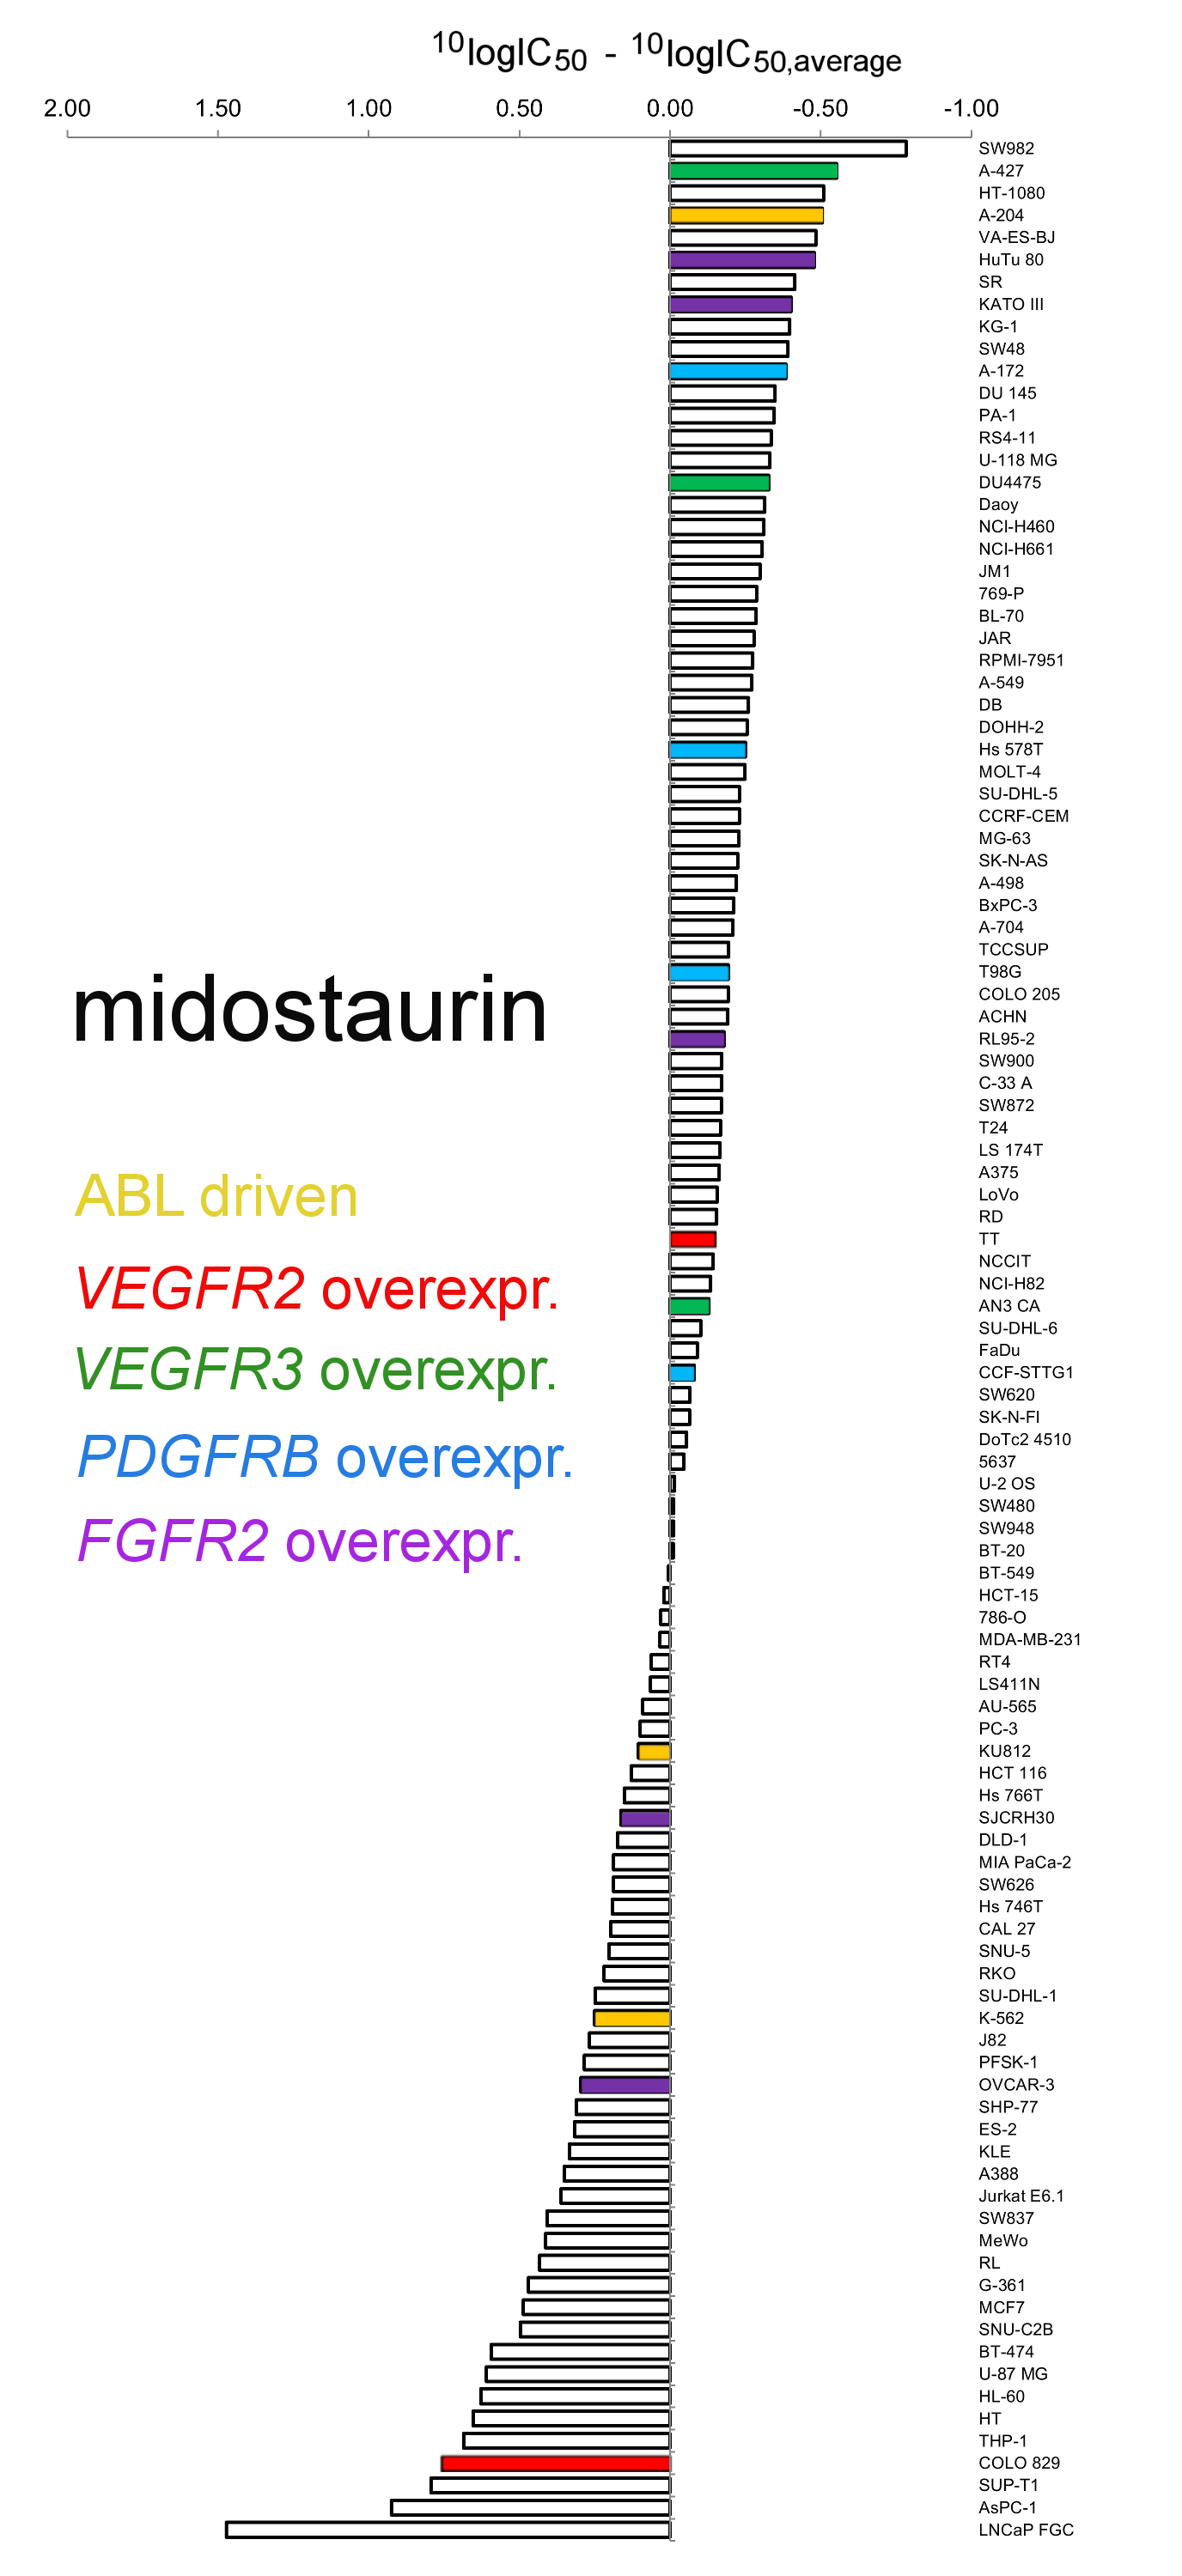
**
